# Supplementary material for: A cellular surveillance and defense system that delays aging phenotypes in C. elegans
Source: publisher site journal article supplement (doi:10.18632/aging.103134), 2020-04-29
Supplement: Supplementary file [file aging-v12i9-103134-supplementary-material-SD3.pdf]

## SUPPLEMENTARY TABLES

Please browse Full Text version to see the data of Supplementary Table 1.

### Supplementary Table 1. (Uploaded xls file) DEGs in between worms with high MV and worms with low MV.

Differentially expressed genes (DEGs) of each microarray data set were determined by three criteria (I) present probe; (II) combined p-values (<0.05); and (III) absolute log2 fold-changes (>0.58, 1.5 fold change).

### Supplementary Table 2. Mitochondria-related genes up- and down-regulated in worms with low MV.

| No. | WB ID          | Sequence name | Gene name       | UP/DOWN in low MV |
|-----|----------------|---------------|-----------------|-------------------|
| 1   | WBGene00000182 | B0336.2       | <i>arf-1.2</i>  | UP                |
| 2   | WBGene00000230 | F27C1.7       | <i>atp-3</i>    | UP                |
| 3   | WBGene00018763 | F53F10.1      | <i>F53F10.1</i> | UP                |
| 4   | WBGene00002981 | ZK593.6       | <i>lgg-2</i>    | UP                |
| 5   | WBGene00008980 | F20D1.10      | <i>tag-299</i>  | UP                |
| 6   | WBGene00016943 | C55B7.4       | <i>acdh-1</i>   | DOWN              |
| 7   | WBGene00001566 | C28C12.9      | <i>acdh-13</i>  | DOWN              |
| 8   | WBGene00000206 | F35G12.10     | <i>asb-1</i>    | DOWN              |
| 9   | WBGene00010015 | F54B3.3       | <i>atad-3</i>   | DOWN              |
| 10  | WBGene00010042 | F54C9.6       | <i>bcs-1</i>    | DOWN              |
| 11  | WBGene00011872 | T20G5.10      | <i>blos-1</i>   | DOWN              |
| 12  | WBGene00077500 | C27H6.9       | <i>C27H6.9</i>  | DOWN              |
| 13  | WBGene00014172 | ZK970.2       | <i>clpp-1</i>   | DOWN              |
| 14  | WBGene00000550 | F55H2.6       | <i>clu-1</i>    | DOWN              |
| 15  | WBGene00018240 | F40G9.2       | <i>cox-17</i>   | DOWN              |
| 16  | WBGene00000933 | C14A4.2       | <i>dap-3</i>    | DOWN              |
| 17  | WBGene00001028 | F22B7.5       | <i>dnj-10</i>   | DOWN              |
| 18  | WBGene00001093 | T12E12.4      | <i>drp-1</i>    | DOWN              |
| 19  | WBGene00017159 | F01F1.2       | <i>F01F1.2</i>  | DOWN              |
| 20  | WBGene00017301 | F09F7.4       | <i>F09F7.4</i>  | DOWN              |
| 21  | WBGene00017770 | F25B4.7       | <i>F25B4.7</i>  | DOWN              |
| 22  | WBGene00018426 | F44E7.4       | <i>F44E7.4</i>  | DOWN              |
| 23  | WBGene00019022 | F58A6.1       | <i>F58A6.1</i>  | DOWN              |
| 24  | WBGene00001486 | F59G1.7       | <i>frh-1</i>    | DOWN              |
| 25  | WBGene00011083 | R07B1.12      | <i>glo-1</i>    | DOWN              |
| 26  | WBGene00016266 | C30F12.7      | <i>idhg-2</i>   | DOWN              |
| 27  | WBGene00002879 | C29E4.8       | <i>let-754</i>  | DOWN              |
| 28  | WBGene00008415 | D2030.5       | <i>mce-1</i>    | DOWN              |
| 29  | WBGene00022373 | Y92H12BR.8    | <i>mrpl-15</i>  | DOWN              |
| 30  | WBGene00022470 | Y119C1B.4     | <i>mrpl-19</i>  | DOWN              |
| 31  | WBGene00012992 | Y48C3A.10     | <i>mrpl-20</i>  | DOWN              |
| 32  | WBGene00019076 | F59A3.3       | <i>mrpl-24</i>  | DOWN              |
| 33  | WBGene00020796 | T25D3.2       | <i>mrpl-28</i>  | DOWN              |
| 34  | WBGene00011334 | T01E8.6       | <i>mrps-14</i>  | DOWN              |
| 35  | WBGene00022583 | ZC262.8       | <i>mrps-18A</i> | DOWN              |
| 36  | WBGene00016142 | C26E6.6       | <i>mrps-18C</i> | DOWN              |
| 37  | WBGene00017319 | F09G8.3       | <i>mrps-9</i>   | DOWN              |
| 38  | WBGene00020625 | T20F5.3       | <i>mrrf-1</i>   | DOWN              |
| 39  | WBGene00009559 | F39B2.11      | <i>mtx-1</i>    | DOWN              |
| 40  | WBGene00004190 | T27F6.5       | <i>pars-2</i>   | DOWN              |
| 41  | WBGene00004092 | F44C4.5       | <i>ppt-1</i>    | DOWN              |
| 42  | WBGene00020022 | R12C12.1      | <i>R12C12.1</i> | DOWN              |
| 43  | WBGene00011309 | R186.8        | <i>R186.8</i>   | DOWN              |
| 44  | WBGene00044305 | F56H1.6       | <i>rad-8</i>    | DOWN              |
| 45  | WBGene00015391 | C03G5.1       | <i>sdha-1</i>   | DOWN              |

|    |                |            |                   |      |
|----|----------------|------------|-------------------|------|
| 46 | WBGene00044049 | C41C4.10   | <i>sfxn-5</i>     | DOWN |
| 47 | WBGene00004932 | C08A9.1    | <i>sod-3</i>      | DOWN |
| 48 | WBGene00016844 | C50F7.4    | <i>sucg-1</i>     | DOWN |
| 49 | WBGene00011662 | T09F3.2    | <i>T09F3.2</i>    | DOWN |
| 50 | WBGene00020636 | T20H4.5    | <i>T20H4.5</i>    | DOWN |
| 51 | WBGene00006572 | C06G3.11   | <i>tin-9.1</i>    | DOWN |
| 52 | WBGene00021248 | Y22D7AL.10 | <i>Y22D7AL.10</i> | DOWN |
| 53 | WBGene00012885 | Y45F10D.4  | <i>Y45F10D.4</i>  | DOWN |
| 54 | WBGene00014227 | ZK1128.1   | <i>ZK1128.1</i>   | DOWN |
| 55 | WBGene00022862 | ZK1236.1   | <i>ZK1236.1</i>   | DOWN |

**Supplementary Table 3. 21 transcription factor genes in RNAi screening.**

| NO. | WB ID          | Sequence name | Gene name      | Fold change in low MV/high MV |
|-----|----------------|---------------|----------------|-------------------------------|
| 1   | WBGene00019327 | K02F3.4       | <i>zip-2</i>   | 3.4                           |
| 2   | WBGene00003602 | H01A20.1      | <i>nhr-3</i>   | 3.3                           |
| 3   | WBGene00009827 | F47G4.6       | <i>hmg-6</i>   | 3.3                           |
| 4   | WBGene00006775 | F56A12.1      | <i>unc-39</i>  | 3.2                           |
| 5   | WBGene00001210 | K11G9.4       | <i>egl-46</i>  | 3.2                           |
| 6   | WBGene00000430 | C16C2.1       | <i>ceh-5</i>   | 3.1                           |
| 7   | WBGene00000435 | W03A3.1       | <i>ceh-10</i>  | 3.0                           |
| 8   | WBGene00003653 | C06C6.4       | <i>nhr-63</i>  | 2.9                           |
| 9   | WBGene00000561 | C34E10.7      | <i>cnd-1</i>   | 2.9                           |
| 10  | WBGene00000463 | C28A5.4       | <i>ceh-43</i>  | 2.8                           |
| 11  | WBGene00003651 | W01D2.2       | <i>nhr-61</i>  | 2.6                           |
| 12  | WBGene00004949 | K08A8.2       | <i>sox-2</i>   | 2.6                           |
| 13  | WBGene00003648 | R11G11.2      | <i>nhr-58</i>  | 2.5                           |
| 14  | WBGene00004786 | F44A6.2       | <i>sex-1</i>   | 2.4                           |
| 15  | WBGene00001081 | F47A4.2       | <i>dpy-22</i>  | 2.3                           |
| 16  | WBGene00001976 | T05A7.4       | <i>hmg-11</i>  | 2.2                           |
| 17  | WBGene00019741 | M02H5.3       | <i>nhr-201</i> | 2.1                           |
| 18  | WBGene00012317 | W06H12.1      | <i>ztf-6</i>   | 2.1                           |
| 19  | WBGene00009939 | F52F12.6      | <i>ztf-11</i>  | 2.1                           |
| 20  | WBGene00004751 | K10G6.3       | <i>sea-2</i>   | 2.0                           |
| 21  | WBGene00022554 | ZC204.2       | <i>duxl-1</i>  | 2.0                           |
