# Supplementary material for: A cellular surveillance and defense system that delays aging phenotypes in C. elegans
Source: Aging (Albany NY). 2020 Apr 29;12(9):8202–20. doi: 10.18632/aging.103134 (PMC7244029; doi:10.18632/aging.103134)
Supplement: Supplementary Table 1 [file aging-12-103134-s002..xlsx]

## Sheet: MV DEG List
Table S1. DEGs in between worms with high MV and worms with low MV. Related to Figure 1.
					Normalized log2 Intensity
Index	WB ID	Sequence Name	Gene Name	UP/DOWN in Low MV	High MV Rep1	High MV Rep2	Low MV Rep1	Low MV Rep2	log2(FC)	FC
1	WBGene00000039	C42D8.5	acn-1	UP	7.66828	7.92324	9.82133	9.65229	1.94105	3.83985
2	WBGene00000051	R01E6.4	acr-12	UP	6.53764	6.72778	7.88864	7.82597	1.2246	2.3369
3	WBGene00000056	F53E10.2	acr-17	UP	8.35338	8.29878	9.49827	9.42076	1.13344	2.19381
4	WBGene00000066	M03F4.2	act-4	UP	14.57	14.5141	15.6677	15.6923	1.13797	2.20072
5	WBGene00000086	C02H7.3	aex-3	UP	7.65397	7.57037	9.03291	8.94191	1.37524	2.59411
6	WBGene00000092	F32A6.4	ags-3	UP	11.6617	11.7587	12.7415	12.7557	1.03833	2.05385
7	WBGene00000100	C25A11.4	ajm-1	UP	9.86537	9.76685	11.5791	11.5095	1.72821	3.31316
8	WBGene00000105	F48F7.1	alg-1	UP	8.73914	8.53584	10.2715	10.1603	1.57843	2.98645
9	WBGene00000140	ZK973.6	anc-1	UP	10.3492	10.1653	12.2313	11.5837	1.65024	3.13886
10	WBGene00000149	C42D8.8	apl-1	UP	12.3042	12.2393	13.8979	13.5198	1.43706	2.70768
11	WBGene00000170	C01G6.1	aqp-2	UP	12.1885	12.439	14.5722	14.4794	2.21208	4.63341
12	WBGene00000174	C32C4.2	aqp-6	UP	8.829	8.73672	9.85978	9.85497	1.07451	2.10601
13	WBGene00000182	B0336.2	arf-1.2	UP	12.8437	12.8249	13.5455	13.5513	0.714041	1.64039
14	WBGene00000188	F19H8.3	arl-3	UP	6.52421	6.82261	7.93709	8.06423	1.32725	2.50924
15	WBGene00000190	F45E4.1	arf-1.1	UP	8.35338	8.82858	10.3285	10.9588	2.05263	4.14863
16	WBGene00000208	Y53F4B.15	asc-1	UP	13.2293	13.0928	14.1303	14.1714	0.989867	1.986
17	WBGene00000230	F27C1.7	atp-3	UP	14.8817	14.8573	15.5447	15.5357	0.67075	1.5919
18	WBGene00000240	K08F8.4	pah-1	UP	10.5991	11.0086	12.7878	12.5552	1.86766	3.6494
19	WBGene00000272	F56A3.5	bro-1	UP	5.8526	5.88032	6.92221	6.94273	1.06601	2.09363
20	WBGene00000277	C23H4.1	cab-1	UP	11.3334	11.7026	13.0309	12.9132	1.45402	2.7397
21	WBGene00000294	F41G4.2	cas-1	UP	12.5486	12.665	13.6026	13.4953	0.942205	1.92146
22	WBGene00000366	R10E11.1	cbp-1	UP	12.5241	12.2005	13.6549	13.6026	1.26653	2.40582
23	WBGene00000373	F08F3.7	cyp-14A5	UP	9.77415	10.091	11.7472	11.6433	1.76264	3.39319
24	WBGene00000387	F16B4.8	cdc-25.2	UP	11.897	11.6278	13.041	13.0154	1.26584	2.40468
25	WBGene00000395	ZK112.7	cdh-3	UP	9.58358	9.3996	10.6047	10.6352	1.12834	2.18606
26	WBGene00000401	F59C12.1	cdh-9	UP	6.7923	6.95956	8.53973	8.60044	1.69415	3.23587
27	WBGene00000403	B0034.3	casy-1	UP	9.08652	9.17716	10.1208	10.1405	0.998811	1.99835
28	WBGene00000425	ZK512.3	ced-11	UP	10.4481	10.5207	12.021	12.1436	1.59791	3.02704
29	WBGene00000430	C16C2.1	ceh-5	UP	8.11511	8.27194	9.74312	9.89698	1.62652	3.08767
30	WBGene00000435	W03A3.1	ceh-10	UP	10.2071	9.88887	11.8041	11.4502	1.57915	2.98794
31	WBGene00000443	F31E3.1	ceh-20	UP	12.2365	12.3672	13.5191	13.6417	1.27855	2.42596
32	WBGene00000448	K12H4.1	pros-1	UP	7.96668	7.83617	9.48519	9.68719	1.68476	3.21487
33	WBGene00000449	F46F3.1	ceh-27	UP	6.14341	6.30859	7.7822	7.74297	1.53658	2.90106
34	WBGene00000453	W05E10.3	ceh-32	UP	11.6904	11.878	13.4021	13.3597	1.59672	3.02454
35	WBGene00000463	C28A5.4	ceh-43	UP	12.0392	12.3745	13.6488	13.7524	1.49378	2.81627
36	WBGene00000469	ZK909.4	ces-2	UP	11.3597	12.0178	13.2389	13.582	1.72164	3.29812
37	WBGene00000478	F27E11.3	cfz-2	UP	9.78024	10.1816	11.5127	11.6342	1.59256	3.01585
38	WBGene00000482	T14G8.1	chd-3	UP	12.2965	12.1285	13.7402	13.6762	1.49569	2.81998
39	WBGene00000485	F18C12.1	che-3	UP	7.19942	7.32566	8.41362	8.42643	1.15749	2.23068
40	WBGene00000491	B0024.8	che-12	UP	6.89388	7.23789	8.72912	8.76152	1.67944	3.20304
41	WBGene00000493	F56H1.1	che-14	UP	7.85723	7.76216	8.71157	8.68048	0.886328	1.84847
42	WBGene00000503	C04F6.3	cht-1	UP	15.2402	15.2395	16.053	16.0901	0.831715	1.7798
43	WBGene00000516	T05A6.1	cki-1	UP	12.3539	12.7052	14.1377	14.3944	1.73649	3.33223
44	WBGene00000545	Y39A3CL.5	clp-4	UP	10.313	10.39	11.8698	11.7192	1.44301	2.71887
45	WBGene00000555	R09B5.2	cnc-1	UP	6.21255	5.99408	7.50684	7.40111	1.35066	2.55028
46	WBGene00000561	C34E10.7	cnd-1	UP	8.18047	7.98893	9.50743	9.73153	1.53478	2.89745
47	WBGene00000562	F14H8.6	cng-1	UP	8.84986	9.15084	10.6475	10.7143	1.68053	3.20546
48	WBGene00000566	Y39A1A.15	cnt-2	UP	11.3786	11.2576	12.2987	12.2838	0.97315	1.96312
49	WBGene00000591	K08A8.3	coh-1	UP	11.7136	11.4997	12.8204	12.7792	1.19317	2.28655
50	WBGene00000610	F36A4.6	col-33	UP	10.1691	9.99082	11.5457	11.2339	1.30986	2.47918
51	WBGene00000624	Y18H1A.12	col-47	UP	10.2701	10.2069	11.0869	11.005	0.807436	1.7501
52	WBGene00000625	Y54E10BL.2	col-48	UP	8.25144	8.19467	9.48359	9.25117	1.14432	2.21042
53	WBGene00000650	ZK1248.2	col-74	UP	6.17581	5.73958	9.28298	8.41081	2.8892	7.40858
54	WBGene00000652	M110.1	col-76	UP	9.06664	9.31387	10.4471	10.3987	1.23265	2.34999
55	WBGene00000665	C29E4.1	col-90	UP	5.40825	5.2847	6.94992	7.13269	1.69483	3.23739
56	WBGene00000695	F56D5.1	col-121	UP	8.41231	8.8781	10.5787	10.6108	1.94959	3.86264
57	WBGene00000704	F08G5.4	col-130	UP	6.06519	6.23143	8.40287	7.70642	1.90633	3.74855
58	WBGene00000710	Y51H4A.9	col-137	UP	5.99408	5.8526	7.30516	7.42055	1.43951	2.71229
59	WBGene00000719	T06E4.6	col-146	UP	5.38281	5.16406	7.08835	7.21523	1.87836	3.67656
60	WBGene00000734	C50B6.4	col-161	UP	7.37636	7.28015	8.61856	9.07355	1.5178	2.86353
61	WBGene00000738	F14H12.1	col-165	UP	13.7041	13.5532	15.3535	15.3774	1.7368	3.33295
62	WBGene00000780	F49D11.8	cpn-4	UP	11.454	11.4928	12.4219	12.3268	0.900955	1.8673
63	WBGene00000792	F11C7.4	crb-1	UP	8.79837	8.88383	9.92365	9.97147	1.10645	2.15316
64	WBGene00000795	CD4.2	crn-2	UP	12.0782	12.126	13.2406	13.3391	1.18778	2.27802
65	WBGene00000800	Y23H5A.7	cars-1	UP	10.1082	10.2134	11.3049	11.1449	1.06406	2.0908
66	WBGene00000801	Y23H5A.1	cars-2	UP	10.5634	10.6001	11.6812	11.6527	1.08513	2.12157
67	WBGene00000802	Y38A10A.5	crt-1	UP	14.6033	14.6346	15.2601	15.2727	0.647417	1.56636
68	WBGene00000832	Y23H5A.5	ctn-1	UP	11.7142	11.7561	12.5455	12.4923	0.783712	1.72155
69	WBGene00000870	Y38F1A.5	cyd-1	UP	11.6662	12.0418	13.2522	13.4572	1.50072	2.82983
70	WBGene00000881	F31C3.1	cyn-5	UP	15.6052	15.6497	16.3879	16.4319	0.782455	1.72006
71	WBGene00000899	F25E2.5	daf-3	UP	10.2716	10.2083	10.9742	11.0223	0.758306	1.6915
72	WBGene00000928	M03A1.7	dao-2	UP	12.2169	12.6233	14.156	13.963	1.63939	3.11534
73	WBGene00000953	F58G6.6	del-2	UP	6.62038	6.74793	7.7389	7.76882	1.06971	2.09901
74	WBGene00000959	F46H6.2	dgk-2	UP	11.2428	11.3978	12.3974	12.4185	1.08768	2.12532
75	WBGene00000961	T21B6.1	dgn-1	UP	10.6811	10.4811	11.958	11.9554	1.37556	2.59469
76	WBGene00001006	C25F6.2	dlg-1	UP	11.0651	11.1903	12.8585	12.9602	1.78166	3.43821
77	WBGene00001017	ZK593.5	dnc-1	UP	13.3091	13.2804	14.1658	14.2592	0.917691	1.88909
78	WBGene00001064	T14B4.6	dpy-2	UP	9.39001	9.82428	11.5263	11.5717	1.94185	3.84198
79	WBGene00001069	F46C8.6	dpy-7	UP	7.83617	8.02481	9.50812	9.55586	1.6015	3.03458
80	WBGene00001072	T14B4.7	dpy-10	UP	10.8491	11.0051	12.6193	12.573	1.66904	3.18004
81	WBGene00001075	H27M09.4	dpy-14	UP	14.7732	14.705	16.1581	16.1171	1.39852	2.63632
82	WBGene00001076	F54D8.1	dpy-17	UP	13.4113	13.2325	15.4775	15.2382	2.03593	4.10086
83	WBGene00001077	Y47D3B.10	dpy-18	UP	11.5375	11.4765	12.6255	12.6128	1.11211	2.16161
84	WBGene00001081	F47A4.2	dpy-22	UP	10.2446	10.0335	11.3422	11.282	1.17304	2.25486
85	WBGene00001086	R13G10.1	dpy-27	UP	12.8513	12.8114	13.8111	13.8389	0.993642	1.99121
86	WBGene00001101	C34F11.9	dsh-1	UP	10.1608	10.2964	11.5324	11.6259	1.35057	2.55012
87	WBGene00001105	Y41D4B.10	dsl-3	UP	13.2761	13.109	14.7706	14.7366	1.56107	2.95074
88	WBGene00001118	ZK520.3	dyf-2	UP	8.62315	8.64375	9.67777	9.78126	1.09606	2.13771
89	WBGene00001123	C43C3.3	dyf-7	UP	8.38184	8.61699	10.0129	10.2291	1.62157	3.0771
90	WBGene00001131	F15D3.1	dys-1	UP	10.9567	11.1548	12.7504	12.6392	1.63907	3.11465
91	WBGene00001147	Y105E8A.7	eat-18	UP	10.3581	10.3857	12.017	11.9127	1.5929	3.01654
92	WBGene00001163	C43F9.8	efn-2	UP	8.74754	9.16715	10.3059	10.4526	1.42188	2.67935
93	WBGene00001165	F56A11.3	efn-4	UP	11.0798	11.0323	11.9786	12.0961	0.981365	1.97433
94	WBGene00001169	R03G5.1	eef-1A.2	UP	11.8213	11.7399	13.6461	13.4194	1.75217	3.36864
95	WBGene00001196	M01D7.7	egl-30	UP	9.35616	9.14289	10.3564	10.3378	1.0976	2.13998
96	WBGene00001207	R53.3	egl-43	UP	8.50667	8.65108	10.0552	10.1317	1.51456	2.85711
97	WBGene00001210	K11G9.4	egl-46	UP	6.57021	6.76134	8.27942	8.36938	1.65863	3.15716
98	WBGene00001251	K02B9.4	elt-3	UP	11.822	11.8224	12.5103	12.476	0.670995	1.59217
99	WBGene00001368	F35H8.5	exc-7	UP	8.93125	8.66278	10.0423	10.1303	1.28932	2.44412
100	WBGene00001432	B0511.1	fkb-7	UP	11.1038	11.3035	12.8614	12.9759	1.71499	3.28295
101	WBGene00001445	W07E11.3	flp-2	UP	8.35338	8.39665	9.0304	9.01234	0.646357	1.56521
102	WBGene00001458	ZK525.1	flp-15	UP	11.6868	12.0147	13.6572	14.1023	2.02905	4.08135
103	WBGene00001464	C26F1.10	flp-21	UP	7.9364	7.96498	8.75508	8.8781	0.865902	1.82248
104	WBGene00001475	F15B9.7	fmi-1	UP	8.9393	9.36877	10.8271	10.8716	1.69529	3.23842
105	WBGene00001477	K08C7.5	fmo-2	UP	11.7992	10.9805	14.0295	13.2119	2.23082	4.69399
106	WBGene00001484	T07D1.4	fox-1	UP	9.93036	9.85562	10.7542	10.8724	0.920309	1.89252
107	WBGene00001502	F52D10.3	ftt-2	UP	13.5818	13.4397	14.8693	14.7639	1.30587	2.47233
108	WBGene00001516	ZK899.8	gap-2	UP	11.2183	11.1841	12.3968	12.4372	1.21579	2.32269
109	WBGene00001518	F47D12.1	gar-2	UP	6.9609	6.96159	7.58739	7.58912	0.627006	1.54436
110	WBGene00001537	C30G4.3	gcy-11	UP	8.73914	8.78218	9.84817	9.90204	1.11444	2.16511
111	WBGene00001546	F22E5.3	gcy-21	UP	8.56868	8.53973	9.82992	10.0221	1.37181	2.58795
112	WBGene00001547	T03D8.5	gcy-22	UP	7.69446	7.64164	8.60022	8.79837	1.03125	2.04379
113	WBGene00001556	C46E1.2	gcy-36	UP	7.49288	7.40755	8.76802	8.86185	1.36472	2.57526
114	WBGene00001561	W07B3.2	gei-4	UP	10.2785	10.3208	11.5742	11.6186	1.29679	2.45682
115	WBGene00001669	R10H10.5	gpa-7	UP	8.61309	8.5967	9.38465	9.3559	0.76538	1.69982
116	WBGene00001711	T16G1.8	grl-2	UP	5.44607	5.38281	6.73439	6.58537	1.24544	2.37091
117	WBGene00001714	Y47D7A.5	grl-5	UP	5.04342	5.24241	6.81474	6.69134	1.61012	3.05278
118	WBGene00001717	ZC487.5	grl-8	UP	7.71085	7.72528	8.90341	9.0381	1.25269	2.38285
119	WBGene00001718	ZC487.4	grl-9	UP	6.19797	6.32162	7.36843	7.22494	1.03689	2.0518
120	WBGene00001723	T03D8.4	grl-14	UP	7.13153	7.28244	8.53584	8.67721	1.39954	2.63817
121	WBGene00001724	Y75B8A.20	grl-15	UP	6.62038	6.77917	8.19937	7.90686	1.35334	2.55503
122	WBGene00001730	ZC168.5	grl-21	UP	6.09695	6.07316	7.71765	7.55695	1.55224	2.93273
123	WBGene00001795	C05C12.3	gtl-1	UP	9.40863	9.6617	10.638	10.6731	1.12038	2.17404
124	WBGene00001804	ZC504.5	gur-3	UP	5.8526	5.97169	6.9095	7.05355	1.06938	2.09853
125	WBGene00001821	C07A12.1	ham-2	UP	7.95889	7.86967	9.10809	9.03211	1.15582	2.22811
126	WBGene00001828	F40E10.1	hch-1	UP	11.7658	11.5621	13.8611	13.6965	2.11481	4.33132
127	WBGene00001840	C26D10.2	hel-1	UP	8.23827	8.1922	8.90937	8.9594	0.719149	1.64621
128	WBGene00001844	K02E10.2	hid-1	UP	11.5928	11.5959	12.5979	12.5763	0.9927	1.98991
129	WBGene00001853	Y73B6BL.9	hil-2	UP	16.4226	16.5042	17.201	17.1961	0.735139	1.66456
130	WBGene00001854	F22F1.1	hil-3	UP	14.4841	14.6667	16.2629	16.338	1.72507	3.30595
131	WBGene00001857	F59A7.4	hil-6	UP	15.5357	15.619	16.7486	16.7773	1.18559	2.27457
132	WBGene00001858	C01B10.5	hil-7	UP	11.9301	12.1815	14.5167	14.6892	2.54713	5.8447
133	WBGene00001882	F45F2.12	his-8	UP	13.879	13.7921	14.8228	14.7257	0.938701	1.9168
134	WBGene00001883	ZK131.3	his-9	UP	9.26081	9.22537	10.5472	10.5516	1.30633	2.47311
135	WBGene00001887	ZK131.7	his-13	UP	14.9977	14.7683	16.0246	16.0683	1.16342	2.23988
136	WBGene00001898	M163.3	his-24	UP	14.1411	14.142	15.6052	15.5587	1.44039	2.71395
137	WBGene00001906	F17E9.10	his-32	UP	12.1033	11.8299	13.4562	13.4975	1.51026	2.84862
138	WBGene00001910	C50F4.6	C50F4.6	UP	13.5932	13.7001	14.7067	14.7606	1.08703	2.12436
139	WBGene00001911	C50F4.7	his-37	UP	12.4572	12.514	13.4657	13.5638	1.02914	2.0408
140	WBGene00001918	F08G2.1	his-44	UP	13.3986	12.9759	14.6404	14.5578	1.41187	2.66082
141	WBGene00001919	B0035.10	his-45	UP	14.7841	14.8291	15.5227	15.4775	0.693528	1.61723
142	WBGene00001945	F45E1.6	his-71	UP	12.4334	12.3866	13.6756	13.7427	1.29913	2.46081
143	WBGene00001946	Y49E10.6	his-72	UP	17.0269	17.0215	17.8025	17.8237	0.788901	1.72776
144	WBGene00001971	Y48B6A.14	hmg-1.1	UP	14.4936	14.4055	15.6567	15.5812	1.16944	2.24925
145	WBGene00001976	T05A7.4	hmg-11	UP	12.3698	12.4198	13.5941	13.4613	1.13288	2.19296
146	WBGene00001994	F20B6.8	hpk-1	UP	11.3929	11.2964	12.4696	12.3956	1.08794	2.1257
147	WBGene00002007	C15H9.6	hsp-3	UP	13.0316	13.0039	14.164	13.9898	1.05917	2.08373
148	WBGene00002015	T27E4.8	hsp-16.1	UP	10.8902	11.1291	12.6335	12.6714	1.64275	3.12261
149	WBGene00002065	F54C9.1	iff-2	UP	13.7002	13.7002	14.938	14.8683	1.20293	2.30207
150	WBGene00002067	C43C3.1	ifp-1	UP	6.17581	6.47853	8.61856	7.84321	1.90371	3.74175
151	WBGene00002069	C04F12.3	ikb-1	UP	9.10961	9.34211	10.5677	10.3631	1.23953	2.36121
152	WBGene00002085	ZK75.2	ins-2	UP	12.6054	12.8023	13.9103	14.0628	1.28271	2.43295
153	WBGene00002087	ZK75.1	ins-4	UP	7.22949	7.35249	8.88077	8.73672	1.51775	2.86344
154	WBGene00002090	ZK1251.2	ins-7	UP	12.5077	12.5237	13.5621	13.425	0.977861	1.96954
155	WBGene00002091	ZK1251.11	ins-8	UP	10.3466	10.4572	12.4204	12.4973	2.05699	4.16116
156	WBGene00002103	ZK84.7	ins-20	UP	7.57225	7.86346	10.5175	10.4208	2.75129	6.7332
157	WBGene00002106	M04D8.3	ins-23	UP	10.4474	10.5502	12.0887	12.2516	1.67133	3.18508
158	WBGene00002113	ZC334.2	ins-30	UP	7.21747	7.37415	8.64084	8.54569	1.29746	2.45795
159	WBGene00002117	F52B11.6	ins-34	UP	11.0577	10.938	12.4713	12.2766	1.37609	2.59564
160	WBGene00002123	C16E9.4	inx-1	UP	5.68505	5.68505	6.88165	6.76291	1.13723	2.19958
161	WBGene00002125	F22F4.2	inx-3	UP	13.3959	13.364	14.1556	14.1541	0.774886	1.71105
162	WBGene00002127	R09F10.4	inx-5	UP	9.69505	9.87066	11.1867	11.2793	1.45013	2.73232
163	WBGene00002178	B0478.1	jnk-1	UP	8.77635	8.97642	10.2757	10.1603	1.34166	2.53443
164	WBGene00002181	K03D10.1	kal-1	UP	9.71415	9.6617	10.9144	10.9892	1.2639	2.40144
165	WBGene00002182	F08F8.3	kap-1	UP	9.83438	9.8476	10.5673	10.5989	0.742085	1.67259
166	WBGene00002184	C47D12.7	kel-1	UP	8.50246	8.58161	9.63885	9.53711	1.04594	2.06472
167	WBGene00002191	B0205.7	kin-3	UP	12.6448	12.5968	13.4917	13.4899	0.869984	1.82764
168	WBGene00002195	F08F1.1	kin-9	UP	6.53764	6.59441	7.49083	7.50684	0.932809	1.90899
169	WBGene00002222	F20C5.2	klp-11	UP	9.03195	9.14108	10.1838	10.2429	1.12683	2.18378
170	WBGene00002232	F11A6.1	kpc-1	UP	8.90584	8.94451	9.91132	9.99273	1.02686	2.03758
171	WBGene00002282	C44H4.2	let-4	UP	9.69439	9.76055	11.0719	11.0338	1.32541	2.50604
172	WBGene00002717	C01G8.9	let-526	UP	12.536	12.3499	13.6204	13.5628	1.14867	2.21709
173	WBGene00002827	C29E6.1	let-653	UP	10.3605	10.3042	11.6476	11.6476	1.31523	2.48843
174	WBGene00002981	ZK593.6	lgg-2	UP	13.0072	12.9689	13.6762	13.6338	0.666968	1.58773
175	WBGene00003006	Y71F9B.5	lin-17	UP	8.6972	8.58022	9.80619	9.81677	1.17277	2.25445
176	WBGene00003040	T12F5.4	lin-59	UP	8.93125	8.83881	9.7758	9.83321	0.919475	1.89143
177	WBGene00003057	ZK836.1	lon-3	UP	5.75301	5.82738	7.46856	7.34461	1.6164	3.06608
178	WBGene00003072	T21E3.3	lrp-2	UP	11.7172	11.6649	12.774	12.7173	1.05457	2.07711
179	WBGene00003089	K02C4.4	ltd-1	UP	9.60695	9.97453	11.2327	11.5063	1.57876	2.98713
180	WBGene00003092	Y22F5A.6	lys-3	UP	8.05273	7.95306	11.5957	10.6036	3.09675	8.55489
181	WBGene00003143	C34B4.1	max-1	UP	8.58399	8.88248	9.93738	9.95252	1.21171	2.31612
182	WBGene00003149	T04C10.1	mbk-1	UP	11.7133	11.6873	12.5643	12.5378	0.850759	1.80345
183	WBGene00003163	R03E9.1	mdl-1	UP	10.8867	10.8324	12.2786	12.1208	1.34014	2.53175
184	WBGene00003172	F46A9.6	mec-8	UP	11.7139	11.6486	12.6557	12.7549	1.0241	2.03369
185	WBGene00003175	C44B11.3	mec-12	UP	8.65813	8.67126	10.1391	9.92636	1.36806	2.58123
186	WBGene00003237	Y73B6BL.13	mif-4	UP	8.04538	8.20822	9.08764	9.15871	0.996376	1.99498
187	WBGene00003243	F10E9.6	mig-10	UP	10.4257	10.4683	11.6868	11.619	1.20588	2.30678
188	WBGene00003247	ZC504.4	mig-15	UP	11.6478	11.6507	13.1249	13.1417	1.48408	2.79739
189	WBGene00003249	F11F1.6	mig-18	UP	10.5615	10.8427	12.3086	12.1782	1.54128	2.91053
190	WBGene00003367	M106.1	mix-1	UP	12.0588	12.1065	12.8103	12.7938	0.719448	1.64655
191	WBGene00003385	W01A11.6	moc-2	UP	11.6506	11.6172	12.6679	12.6304	1.01528	2.02129
192	WBGene00003407	F57C12.5	mrp-1	UP	9.16526	9.15526	9.81519	9.77339	0.634034	1.5519
193	WBGene00003408	F57C12.4	mrp-2	UP	9.91446	9.99273	12.0476	11.967	2.05371	4.15171
194	WBGene00003482	K08E5.3	mua-3	UP	7.40864	7.3915	8.65836	8.82281	1.34051	2.53241
195	WBGene00003518	R107.1	nac-2	UP	11.9945	11.6037	13.4986	13.2891	1.59473	3.02037
196	WBGene00003562	F09G8.4	ncr-2	UP	7.76664	7.80597	8.76002	8.90003	1.04372	2.06154
197	WBGene00003568	ZC168.1	ncx-3	UP	10.8159	10.9488	12.1004	12.1751	1.25541	2.38735
198	WBGene00003589	T07C4.9	nex-2	UP	10.7133	10.9011	11.9823	12.0968	1.23234	2.34949
199	WBGene00003591	C37H5.1	nex-4	UP	5.8526	5.94571	7.15319	7.06441	1.20965	2.31281
200	WBGene00003595	Y69A2AR.29	ngn-1	UP	7.93977	7.97889	8.62676	8.6555	0.681798	1.60414
201	WBGene00003597	F54G8.4	nhl-1	UP	8.13585	8.31467	10.1076	9.73822	1.69763	3.24368
202	WBGene00003600	R09G11.2	nhr-1	UP	7.21747	7.25806	7.94693	7.91356	0.692477	1.61606
203	WBGene00003601	C32F10.6	nhr-2	UP	12.3142	12.2751	12.9473	12.9175	0.637709	1.55586
204	WBGene00003602	H01A20.1	nhr-3	UP	10.6167	10.864	12.5214	12.4234	1.73205	3.32199
205	WBGene00003623	F11C1.6	nhr-25	UP	9.78684	9.66957	10.9534	11.065	1.281	2.43007
206	WBGene00003628	C07A12.3	nhr-35	UP	10.0205	9.99082	10.9469	10.936	0.935768	1.91291
207	WBGene00003633	C29E6.5	nhr-43	UP	9.00986	9.082	10.6686	10.5436	1.56016	2.94887
208	WBGene00003648	R11G11.2	nhr-58	UP	8.15355	8.14099	9.38093	9.50743	1.29691	2.45702
209	WBGene00003651	W01D2.2	nhr-61	UP	11.887	11.878	13.2976	13.2511	1.39187	2.62419
210	WBGene00003653	C06C6.4	nhr-63	UP	7.81003	8.07425	9.45843	9.52105	1.5476	2.92331
211	WBGene00003663	C27C7.4	nhr-73	UP	7.08835	7.16813	7.92324	7.91956	0.793159	1.73286
212	WBGene00003680	ZK488.2	nhr-90	UP	10.6692	10.6942	11.3996	11.3719	0.704039	1.62906
213	WBGene00003681	Y15E3A.1	nhr-91	UP	7.09896	6.9459	8.04874	8.12093	1.06241	2.08842
214	WBGene00003712	Y41D4B.9	nhr-122	UP	11.3528	11.4502	12.4228	12.4197	1.01975	2.02756
215	WBGene00003717	T13F3.3	nhr-127	UP	7.61234	7.63874	8.6317	8.68257	1.0316	2.04429
216	WBGene00003719	C50B6.14	nhr-129	UP	9.21636	9.22537	10.2629	10.4267	1.12391	2.17937
217	WBGene00003740	T24D8.5	nlp-2	UP	7.96668	7.78414	9.83637	9.61708	1.85131	3.60828
218	WBGene00003749	ZK1320.10	nlp-11	UP	9.26814	9.38814	10.5054	10.3643	1.10672	2.15355
219	WBGene00003752	D1009.4	nlp-14	UP	7.36663	7.40755	8.5543	8.49651	1.13831	2.20124
220	WBGene00003772	F20B10.1	nlr-1	UP	6.80677	6.7158	7.62517	7.57797	0.840283	1.7904
221	WBGene00003844	K11C4.4	odc-1	UP	14.7181	14.3972	16.2933	16.3277	1.75287	3.37028
222	WBGene00003849	T01C4.2	odr-2	UP	8.16615	8.08085	9.17338	9.13447	1.03043	2.04263
223	WBGene00003856	C53B7.5	odr-10	UP	5.92206	6.37054	8.43939	8.38184	2.26431	4.80426
224	WBGene00003883	T27B1.1	osm-1	UP	10.1206	9.98355	11.1191	11.0703	1.0426	2.05993
225	WBGene00003890	T20H4.1	osm-10	UP	6.22451	6.25275	7.07767	7.12497	0.862694	1.81843
226	WBGene00003892	Y75B8A.12	osm-12	UP	7.09896	7.26505	8.19433	8.2115	1.02091	2.0292
227	WBGene00003903	F18H3.3	pab-2	UP	11.384	11.3725	13.1121	12.9404	1.64805	3.13409
228	WBGene00003909	F45B8.4	pag-3	UP	7.13153	7.05233	8.56403	8.84949	1.61483	3.06276
229	WBGene00003963	C07A12.4	pdi-2	UP	11.5999	11.276	12.8858	12.6596	1.33477	2.52236
230	WBGene00003966	C27H5.1	pdl-1	UP	6.9341	7.23186	8.38718	8.36448	1.29285	2.45012
231	WBGene00003999	C05A9.1	pgp-5	UP	8.20087	8.50272	9.91758	9.82133	1.51766	2.86326
232	WBGene00004000	T21E8.1	pgp-6	UP	9.60845	9.70322	11.2743	11.191	1.57681	2.98309
233	WBGene00004001	T21E8.2	pgp-7	UP	8.18047	8.349	9.86417	9.92199	1.62835	3.09158
234	WBGene00004002	T21E8.3	pgp-8	UP	7.47859	7.77849	8.85318	9.0381	1.3171	2.49165
235	WBGene00004008	F22E10.3	pgp-14	UP	6.29022	6.42116	8.33774	7.67795	1.65215	3.14303
236	WBGene00004017	F27E5.4	phg-1	UP	6.38097	6.45221	7.82597	7.57797	1.28538	2.43747
237	WBGene00004045	K10F12.3	pll-1	UP	8.40577	8.35445	9.36657	9.30297	0.95466	1.93812
238	WBGene00004048	K04B12.1	plx-2	UP	8.58798	8.77196	10.4408	10.3747	1.72781	3.31225
239	WBGene00004052	H23L24.5	pme-4	UP	7.60959	8.10927	9.68387	9.52724	1.74613	3.35457
240	WBGene00004077	W10C8.2	pop-1	UP	12.3754	12.2438	13.5262	13.5508	1.22894	2.34394
241	WBGene00004108	C34E7.1	pqn-18	UP	7.24024	7.15204	8.45548	8.53194	1.29757	2.45814
242	WBGene00004120	F29C12.1	pqn-32	UP	6.90736	6.9459	8.64763	8.25375	1.52406	2.87599
243	WBGene00004131	F55A12.9	pqn-44	UP	10.1656	10.2502	11.0257	10.9735	0.791702	1.73112
244	WBGene00004140	R09E10.7	ebax-1	UP	10.4904	10.3857	11.2457	11.2399	0.80475	1.74684
245	WBGene00004173	ZC15.8	pqn-94	UP	10.7343	10.6714	11.977	11.7986	1.18492	2.2735
246	WBGene00004174	ZK1067.7	abu-14	UP	7.20545	7.33774	8.42374	8.27942	1.07999	2.11402
247	WBGene00004213	C48D5.2	ptp-1	UP	6.29022	6.25275	7.17816	7.26039	0.947794	1.92892
248	WBGene00004215	C09D8.1	ptp-3	UP	11.2876	11.1043	12.3725	12.2332	1.10695	2.15389
249	WBGene00004219	C45B2.7	ptr-4	UP	8.25849	8.50987	10.3648	10.3537	1.97507	3.93146
250	WBGene00004236	Y80D3A.7	ptr-22	UP	9.26371	9.59575	10.6961	10.7205	1.27857	2.42599
251	WBGene00004265	Y45F10B.10	qui-1	UP	6.31285	6.30859	7.59835	7.39252	1.18471	2.27318
252	WBGene00004278	Y62E10A.9	rab-19	UP	12.4208	12.4657	13.3641	13.3963	0.936911	1.91442
253	WBGene00004317	F20D1.6	rbg-1	UP	11.3073	11.2655	12.1284	12.1364	0.84603	1.79755
254	WBGene00004321	F54E7.7	rcn-1	UP	10.3957	10.4166	11.3607	11.4042	0.976264	1.96736
255	WBGene00004368	C32E8.7	ric-19	UP	10.3906	10.6028	11.5628	11.6273	1.09839	2.14115
256	WBGene00004372	C36F7.4	rig-5	UP	9.85083	10.1661	11.4202	11.7035	1.55342	2.93513
257	WBGene00004397	T01B7.7	rol-6	UP	6.02204	6.00274	8.24423	7.6262	1.92283	3.79166
258	WBGene00004423	F07D10.1	rpl-11.2	UP	15.0683	15.1904	16.0966	16.0707	0.954284	1.93762
259	WBGene00004509	M01G12.12	rrf-2	UP	9.17304	9.52412	10.7916	11.1101	1.60226	3.03619
260	WBGene00004700	Y111B2A.18	rsp-3	UP	11.7288	11.8463	13.0493	12.8682	1.17122	2.25202
261	WBGene00004719	F15A2.6	sad-1	UP	7.55474	7.74971	9.11302	9.14545	1.47701	2.78371
262	WBGene00004727	R11G1.4	sax-1	UP	11.5448	11.4928	12.4686	12.6039	1.01744	2.02432
263	WBGene00004729	ZK377.2	sax-3	UP	10.1749	10.0569	10.9872	11.0304	0.892914	1.85692
264	WBGene00004739	H20J18.1	scd-1	UP	8.66606	8.56758	9.68455	9.56499	1.00795	2.01106
265	WBGene00004740	T10H9.2	scd-2	UP	6.80677	6.90311	8.51328	8.37375	1.58858	3.00752
266	WBGene00004745	F52E10.1	sdc-1	UP	11.8852	11.8706	12.5359	12.5798	0.679944	1.60208
267	WBGene00004749	F57C7.3	sdn-1	UP	12.2166	12.2042	13.2009	13.3209	1.0505	2.07124
268	WBGene00004751	K10G6.3	sea-2	UP	6.94722	7.02636	8.03197	7.96811	1.01325	2.01845
269	WBGene00004786	F44A6.2	sex-1	UP	12.6646	12.7243	13.9708	13.9941	1.28802	2.44193
270	WBGene00004809	F44G3.6	skr-3	UP	13.5319	13.5697	14.2879	14.292	0.739093	1.66913
271	WBGene00004825	R12H7.3	skr-19	UP	10.2716	10.3484	11.3253	11.3738	1.03958	2.05564
272	WBGene00004826	R12H7.5	skr-20	UP	12.6739	12.8412	13.8142	13.97	1.13455	2.19549
273	WBGene00004830	Y51A2D.19	slo-1	UP	6.62038	6.58366	7.87724	7.88951	1.28136	2.43068
274	WBGene00004855	R31.1	sma-1	UP	10.8475	10.7972	11.8451	11.7259	0.963146	1.94956
275	WBGene00004949	K08A8.2	sox-2	UP	9.88414	10.2406	11.3847	11.4935	1.37671	2.59675
276	WBGene00004951	K10B3.10	spc-1	UP	11.4602	11.3204	12.9731	12.7582	1.47537	2.78054
277	WBGene00005003	F27C8.4	spp-18	UP	12.9216	12.9851	14.0754	13.9065	1.03761	2.05283
278	WBGene00005005	K04A8.8	spp-20	UP	9.10481	8.8781	11.6059	10.6184	2.12067	4.34897
279	WBGene00005016	B0491.2	sqt-1	UP	5.50666	5.417	8.38124	7.34461	2.4011	5.28205
280	WBGene00005018	F23H12.4	sqt-3	UP	10.0009	9.82688	12.2013	11.6778	2.02564	4.07172
281	WBGene00005106	M01B2.2	srd-28	UP	5.78582	5.97169	7.1119	7.02238	1.18839	2.27898
282	WBGene00005110	T19H12.5	srd-32	UP	7.3277	7.33339	8.40446	8.49148	1.11743	2.1696
283	WBGene00005204	C53A5.8	srg-47	UP	5.19879	5.32126	7.20545	7.20429	1.94484	3.84995
284	WBGene00005427	Y113G7B.2	srh-217	UP	8.08221	8.03161	9.0381	8.98131	0.952791	1.93561
285	WBGene00005516	C05E4.4	sri-4	UP	5.2847	5.32126	7.24745	7.35349	1.99749	3.99304
286	WBGene00005551	F33H12.2	sri-39	UP	5.19879	5.38281	7.19619	7.32195	1.96827	3.91297
287	WBGene00005653	T26H2.8	srr-2	UP	6.49468	6.39608	7.41378	7.4356	0.979306	1.97152
288	WBGene00005655	K11D12.3	srr-4	UP	10.4869	10.8951	12.7175	12.4636	1.89953	3.73091
289	WBGene00005722	H25K10.3	srv-11	UP	5.23757	5.38281	6.5796	6.52196	1.24059	2.36295
290	WBGene00005811	Y43B11AL.3	srw-64	UP	7.20545	7.2461	8.82717	8.76783	1.57173	2.9726
291	WBGene00005832	C25F9.1	srw-85	UP	8.21234	8.24736	10.1791	10.2041	1.9617	3.89521
292	WBGene00005833	C25F9.7	srw-86	UP	8.46313	8.6634	10.2357	10.3394	1.72431	3.30421
293	WBGene00006063	F08C6.4	sto-1	UP	12.9045	12.9667	14.3554	14.3282	1.40622	2.65042
294	WBGene00006163	F10D2.4	str-112	UP	6.85387	6.99001	8.41031	8.11833	1.34237	2.53568
295	WBGene00006165	F59B1.1	str-114	UP	5.65308	5.44607	6.89985	6.88165	1.34117	2.53357
296	WBGene00006181	C05E4.5	str-133	UP	5.13368	5.08654	6.41045	6.55314	1.37169	2.58773
297	WBGene00006208	Y9C9A.3	str-163	UP	5.97439	6.25275	7.69153	8.10988	1.78713	3.45129
298	WBGene00006306	F07A5.5	sue-1	UP	7.42005	7.43042	8.06624	8.01563	0.615698	1.5323
299	WBGene00006331	R10E4.2	sup-26	UP	13.0442	12.8882	14.7375	14.7447	1.7749	3.42215
300	WBGene00006342	C01B7.1	sup-37	UP	8.10401	8.09574	8.71335	8.68747	0.600536	1.51628
301	WBGene00006363	F35D2.5	syd-1	UP	6.84469	6.92221	8.09013	8.046	1.18462	2.27303
302	WBGene00006366	C44H4.3	sym-1	UP	12.1525	12.0823	13.6013	13.5132	1.43983	2.71288
303	WBGene00006380	F31E8.3	tab-1	UP	8.8781	9.00915	10.066	10.0095	1.09416	2.13489
304	WBGene00006404	C31C9.1	tag-10	UP	8.9393	8.80658	9.97932	9.82648	1.02996	2.04197
305	WBGene00006432	F33C8.1	tag-53	UP	10.695	10.7277	11.4513	11.5196	0.774055	1.71007
306	WBGene00006436	W06H8.8	ttn-1	UP	6.24599	6.21255	7.14051	7.13269	0.907331	1.87557
307	WBGene00006444	C33B4.3	shn-1	UP	7.53613	7.61781	9.27859	9.12581	1.62523	3.08491
308	WBGene00006494	H13N06.5	hke-4.2	UP	12.2284	12.1736	13.3731	13.3129	1.14202	2.2069
309	WBGene00006534	ZK899.4	tba-8	UP	5.71947	5.82738	7.4417	6.99831	1.44658	2.72562
310	WBGene00006538	B0272.1	tbb-4	UP	10.7937	11.0686	12.276	12.357	1.38527	2.61222
311	WBGene00006575	F13B10.1	tir-1	UP	12.1249	12.5785	14.1516	14.4213	1.93478	3.82319
312	WBGene00006589	T08B1.2	tnt-4	UP	6.7923	6.89388	9.08235	8.29231	1.84424	3.59065
313	WBGene00006611	C23H3.7	tre-5	UP	8.45342	8.71541	11.1287	10.8729	2.41643	5.33847
314	WBGene00006627	C02F5.8	tsp-1	UP	10.689	10.1741	12.7327	12.0285	1.94904	3.86116
315	WBGene00006640	F39C12.3	tsp-14	UP	9.16056	9.22537	10.6734	10.8071	1.5473	2.92269
316	WBGene00006649	F08F1.8	tth-1	UP	13.0729	13.0311	14.0628	14.0032	0.980969	1.97379
317	WBGene00006651	R05H5.8	tts-2	UP	7.40864	7.51254	9.54803	9.09671	1.86178	3.63455
318	WBGene00006652	Y113G7A.6	ttx-1	UP	5.97439	6.01349	6.69134	6.65979	0.681623	1.60394
319	WBGene00006681	F46A9.3	twk-29	UP	8.18047	8.49054	9.72603	10.0625	1.55874	2.94596
320	WBGene00006714	Y69H2.6	ubc-19	UP	10.5158	10.4789	11.2242	11.1721	0.700822	1.62543
321	WBGene00006717	C06E2.7	ubc-22	UP	7.08835	7.0632	7.79069	7.82597	0.732558	1.66158
322	WBGene00006742	T02C5.5	unc-2	UP	7.78995	7.76216	8.80703	8.81935	1.03713	2.05214
323	WBGene00006750	T10A3.1	unc-10	UP	8.03161	8.08085	9.39664	9.21404	1.24911	2.37695
324	WBGene00006757	F27D9.1	unc-18	UP	8.54399	8.51815	9.12982	9.16309	0.615383	1.53196
325	WBGene00006769	Y37E11C.1	unc-33	UP	10.8615	10.6352	12.2266	12.2501	1.49001	2.8089
326	WBGene00006771	Y71G12B.11	tln-1	UP	9.17404	9.13943	10.5309	10.5386	1.37804	2.59915
327	WBGene00006775	F56A12.1	unc-39	UP	11.5424	11.7688	13.2342	13.4157	1.66939	3.1808
328	WBGene00006780	B0350.2	unc-44	UP	8.61309	8.349	9.94924	10.0351	1.51113	2.85032
329	WBGene00006803	K11C4.3	unc-70	UP	9.71561	9.63388	11.0118	10.9491	1.3057	2.47203
330	WBGene00006805	F55C7.7	unc-73	UP	8.32997	8.2673	9.07572	9.01649	0.747469	1.67884
331	WBGene00006807	C17D12.2	unc-75	UP	5.94571	5.99408	7.51254	7.43973	1.50624	2.84069
332	WBGene00006811	E03A3.6	unc-79	UP	7.36663	7.44072	8.90341	8.57827	1.33716	2.52654
333	WBGene00006816	F54B11.3	unc-84	UP	10.4691	10.407	11.5696	11.5616	1.12753	2.18485
334	WBGene00006818	C30A5.7	unc-86	UP	7.8068	7.91271	9.56094	9.77101	1.80622	3.49725
335	WBGene00006831	C52E12.2	unc-104	UP	5.68505	5.59848	6.5663	6.50611	0.894441	1.85889
336	WBGene00006833	F53F10.4	unc-108	UP	12.9664	13.014	13.8138	13.7867	0.810039	1.75326
337	WBGene00006840	R05D3.7	unc-116	UP	11.6543	11.6649	12.5526	12.6369	0.935106	1.91203
338	WBGene00006852	C53D6.2	unc-129	UP	11.49	11.6557	13.1207	13.0884	1.53172	2.89131
339	WBGene00006853	C47G2.2	unc-130	UP	6.5663	6.57564	7.4417	7.47672	0.888234	1.85091
340	WBGene00006863	F56B6.4	gyg-1	UP	9.43122	9.40255	10.93	10.6654	1.38083	2.60418
341	WBGene00006870	F14F3.1	vab-3	UP	8.97139	9.04867	11.0192	11.1896	2.09437	4.27041
342	WBGene00006876	ZK1151.1	vab-10	UP	10.1278	10.0482	11.4677	11.3364	1.31407	2.48641
343	WBGene00006886	F11C7.3	vap-1	UP	7.10815	7.56462	8.90341	9.00037	1.61551	3.06419
344	WBGene00006923	F08B1.1	vhp-1	UP	10.9616	11.2405	12.779	12.8951	1.73601	3.33112
345	WBGene00006939	C01G12.4	wee-1.2	UP	7.4001	7.23789	8.47586	8.31467	1.07628	2.10859
346	WBGene00006942	F41D9.3	wrk-1	UP	10.1858	10.2799	11.6136	11.6815	1.41466	2.66597
347	WBGene00006952	ZK377.1	wrt-6	UP	8.00946	7.91271	9.15904	9.37256	1.30471	2.47035
348	WBGene00006956	ZK1290.8	wrt-10	UP	11.5131	11.3929	12.8637	12.8645	1.41109	2.65939
349	WBGene00006981	C09C7.1	zig-4	UP	10.5253	10.9501	12.3999	12.5281	1.72627	3.30871
350	WBGene00007007	C44C8.6	mak-2	UP	11.1105	11.1541	12.3694	12.3397	1.22229	2.33316
351	WBGene00007044	B0495.10	cpna-5	UP	8.36938	8.88248	10.2531	10.3857	1.69348	3.23436
352	WBGene00007053	T04D1.4	chd-7	UP	10.3452	10.3631	11.7339	11.5837	1.30463	2.4702
353	WBGene00007064	2RSSE.1	2RSSE.1	UP	8.75547	8.49924	10.1729	10.0104	1.46431	2.75931
354	WBGene00007091	B0001.6	eri-12	UP	12.054	12.0729	13.3898	13.3437	1.30327	2.46787
355	WBGene00007103	B0024.14	crm-1	UP	10.4525	10.4183	12.1394	11.8944	1.5815	2.99282
356	WBGene00007116	B0198.3	B0198.3	UP	6.7923	6.8429	7.98462	8.236	1.29271	2.44988
357	WBGene00007119	B0250.2	calf-1	UP	8.06624	8.15421	9.13943	9.29364	1.10631	2.15295
358	WBGene00007121	B0250.4	B0250.4	UP	9.32141	9.4226	10.6631	10.769	1.34402	2.53858
359	WBGene00007126	B0250.9	dhcr-7	UP	10.0619	10.0987	11.3591	11.5136	1.35604	2.55982
360	WBGene00007133	B0284.3	B0284.3	UP	11.738	11.7751	12.9151	12.8939	1.14798	2.21604
361	WBGene00007166	B0391.11	fbxa-152	UP	6.45221	6.8182	8.0574	8.25375	1.52037	2.86865
362	WBGene00007261	C02C6.3	lron-3	UP	10.5135	10.5634	11.3492	11.3941	0.833227	1.78167
363	WBGene00007271	C03C10.5	C03C10.5	UP	7.98607	8.30259	9.56308	9.35823	1.31632	2.49031
364	WBGene00007286	C04A11.2	C04A11.2	UP	10.6417	10.5955	11.4784	11.5732	0.907235	1.87545
365	WBGene00007335	C05C12.1	C05C12.1	UP	9.4995	9.8233	11.0731	11.2743	1.51231	2.85267
366	WBGene00007345	C05E7.3	C05E7.3	UP	8.92712	8.80308	10.6346	10.7984	1.8514	3.6085
367	WBGene00007351	C05G5.5	C05G5.5	UP	10.5503	10.4849	11.9436	11.9426	1.42545	2.68597
368	WBGene00007365	C06B3.6	C06B3.6	UP	12.8091	12.774	14.4213	14.3187	1.57841	2.98641
369	WBGene00007366	C06B3.7	C06B3.7	UP	8.6517	8.9215	10.0485	10.2608	1.36803	2.58118
370	WBGene00007372	C06B8.7	C06B8.7	UP	10.4111	10.6061	11.7391	11.6594	1.19062	2.28251
371	WBGene00007395	C06H5.7	dcar-1	UP	11.4416	11.5655	12.3847	12.3545	0.866081	1.8227
372	WBGene00007417	C07E3.6	ceh-58	UP	11.7831	11.811	12.7595	12.8057	0.985567	1.98009
373	WBGene00007479	C09F9.2	C09F9.2	UP	7.21747	6.99993	9.08103	9.03211	1.94787	3.85805
374	WBGene00007490	C09G5.8	mks-5	UP	7.76664	7.67712	8.64375	8.782	0.990996	1.98756
375	WBGene00007506	C10C5.2	C10C5.2	UP	9.76623	10.0477	11.204	11.4645	1.42725	2.68934
376	WBGene00007507	C10C5.3	C10C5.3	UP	9.30678	9.47731	11.5479	11.268	2.01594	4.04445
377	WBGene00007508	C10C5.4	C10C5.4	UP	10.4812	10.6128	12.3325	12.114	1.67623	3.19591
378	WBGene00007517	C11E4.2	gpx-3	UP	7.23545	7.2461	9.01681	8.75547	1.64537	3.12828
379	WBGene00007560	C14A4.9	C14A4.9	UP	5.61679	5.68505	8.22264	7.51254	2.21667	4.64818
380	WBGene00007752	C26H9A.2	wdfy-3	UP	10.0024	10.079	11.3121	11.2912	1.26099	2.39661
381	WBGene00007763	C27B7.6	C27B7.6	UP	5.71947	5.78582	7.03033	6.97452	1.24978	2.37806
382	WBGene00007764	C27B7.7	C27B7.7	UP	7.54083	7.88339	9.12336	9.08933	1.39423	2.62849
383	WBGene00007782	C27H2.2	C27H2.2	UP	8.22321	8.22506	9.23068	9.44317	1.11279	2.16263
384	WBGene00007799	C29A12.4	nrx-1	UP	8.8823	8.84241	9.84817	9.98611	1.05479	2.07741
385	WBGene00007806	C29F3.5	clec-230	UP	5.38281	5.2847	7.19332	6.7923	1.65905	3.15809
386	WBGene00007835	C31A11.7	oac-7	UP	7.9053	8.13585	9.44915	9.77475	1.59137	3.01336
387	WBGene00007836	C31C9.2	C31C9.2	UP	13.2276	13.0663	14.2346	14.1861	1.06338	2.08982
388	WBGene00007863	C32C4.3	C32C4.3	UP	7.91727	8.09574	9.17887	9.3559	1.26089	2.39643
389	WBGene00007877	C33A11.1	C33A11.1	UP	9.20786	9.14545	10.5093	10.7322	1.44405	2.72084
390	WBGene00007883	C33A12.4	C33A12.4	UP	10.8363	11.2678	12.7713	12.7352	1.70116	3.25162
391	WBGene00007916	C34C6.3	C34C6.3	UP	8.67126	8.68874	9.32961	9.34852	0.659065	1.57906
392	WBGene00007919	C34C6.7	C34C6.7	UP	12.2227	12.4696	13.6863	13.5048	1.24935	2.37734
393	WBGene00007946	C35A5.2	ugt-33	UP	6.45221	6.56848	7.56462	7.5292	1.03656	2.05133
394	WBGene00007958	C35C5.9	C35C5.9	UP	10.5727	10.7051	11.6656	11.7341	1.06093	2.08627
395	WBGene00007999	C38C6.6	tag-297	UP	5.78582	5.90464	7.3945	7.21523	1.45963	2.75039
396	WBGene00008010	C38D9.2	C38D9.2	UP	8.29773	8.27194	9.26668	9.37742	1.03721	2.05226
397	WBGene00008066	C43D7.2	fbxb-65	UP	7.53613	7.38485	8.4063	8.48142	0.983367	1.97707
398	WBGene00008138	C47D12.4	C47D12.4	UP	11.3264	11.294	12.5627	12.3764	1.15934	2.23356
399	WBGene00008156	C47E12.13	C47E12.13	UP	7.47045	7.47672	8.86052	9.00915	1.46125	2.75347
400	WBGene00008221	C50B6.8	nhr-168	UP	10.4645	10.4533	11.3617	11.3462	0.895034	1.85965
401	WBGene00008255	C51E3.10	C51E3.10	UP	7.64424	7.41378	9.06509	8.7871	1.39709	2.6337
402	WBGene00008314	C54G4.4	C54G4.4	UP	6.58886	6.49468	7.45212	7.5427	0.955642	1.93944
403	WBGene00008320	C54G10.4	C54G10.4	UP	9.14672	9.10911	10.3355	10.167	1.12333	2.17849
404	WBGene00008366	D1046.5	tpra-1	UP	9.05037	9.5193	10.9141	10.7183	1.53137	2.89061
405	WBGene00008368	D1053.3	D1053.3	UP	7.72958	7.96498	9.3092	9.29364	1.45414	2.73993
406	WBGene00008424	D2045.7	D2045.7	UP	9.06664	9.15084	10.1168	10.0535	0.976389	1.96754
407	WBGene00008449	E01G6.1	E01G6.1	UP	5.68505	5.60972	6.92221	6.88165	1.25454	2.38591
408	WBGene00008454	E02A10.4	E02A10.4	UP	8.10988	8.46366	9.72077	9.69926	1.42324	2.68188
409	WBGene00008476	E03H4.8	E03H4.8	UP	8.29118	8.28575	9.85552	10.0538	1.66618	3.17373
410	WBGene00008477	E03H4.10	clec-17	UP	6.42116	6.40124	8.1684	7.68915	1.51757	2.86309
411	WBGene00008484	E04D5.5	E04D5.5	UP	7.71849	8.00633	9.25763	9.13173	1.33227	2.51798
412	WBGene00008549	F07A11.6	din-1	UP	10.7561	10.5972	12.2082	12.045	1.45	2.73209
413	WBGene00008553	F07C6.2	F07C6.2	UP	8.68367	8.60152	9.79622	9.79532	1.15318	2.22403
414	WBGene00008563	F07H5.13	F07H5.13	UP	11.653	11.9999	13.1145	13.3506	1.40609	2.65019
415	WBGene00008591	F08H9.3	F08H9.3	UP	6.52421	6.49468	7.49885	7.46856	0.974263	1.96464
416	WBGene00008599	F09A5.2	F09A5.2	UP	7.03191	7.04137	8.26791	8.19042	1.19252	2.28552
417	WBGene00008601	F09A5.4	F09A5.4	UP	11.6154	11.5932	12.4837	12.4825	0.878808	1.83886
418	WBGene00008605	F09B12.1	mlt-9	UP	6.14341	6.12034	7.63874	7.5292	1.45209	2.73604
419	WBGene00008622	F09C8.2	F09C8.2	UP	11.5754	11.5916	13.3105	13.2648	1.70417	3.2584
420	WBGene00008628	F09F3.6	ttr-21	UP	10.5338	10.8621	12.2854	12.1479	1.51871	2.86534
421	WBGene00008674	F11A5.6	F11A5.6	UP	7.47045	7.49083	8.27073	8.31304	0.811244	1.75472
422	WBGene00008694	F11C1.5	F11C1.5	UP	11.3188	11.3454	12.2168	12.2313	0.89192	1.85564
423	WBGene00008712	F11E6.9	F11E6.9	UP	5.4828	5.8526	7.56097	7.19332	1.70944	3.27034
424	WBGene00008727	F13A7.12	F13A7.12	UP	6.19797	6.37054	7.73291	7.92759	1.546	2.92006
425	WBGene00008745	F13E6.1	F13E6.1	UP	13.378	13.4319	14.1704	14.1105	0.73545	1.66492
426	WBGene00008758	F13E9.9	F13E9.9	UP	5.34336	5.34779	7.35896	7.02636	1.84709	3.59773
427	WBGene00008760	F13E9.11	F13E9.11	UP	9.88085	10.2766	11.9301	12.0838	1.92825	3.80593
428	WBGene00008820	F14F11.2	F14F11.2	UP	9.082	9.45174	10.9083	10.7904	1.58248	2.99485
429	WBGene00008851	F15B9.8	F15B9.8	UP	7.58739	7.85186	9.2594	9.18946	1.50481	2.83787
430	WBGene00008854	F15D3.4	F15D3.4	UP	6.9341	6.66346	8.51724	8.17606	1.54787	2.92385
431	WBGene00008862	F15D4.5	F15D4.5	UP	9.62358	9.85341	11.0873	11.2578	1.43407	2.70208
432	WBGene00008913	F17C11.1	F17C11.1	UP	8.67126	8.21598	10.0649	10.0122	1.59496	3.02087
433	WBGene00008915	F17C11.4	F17C11.4	UP	11.9641	12.0352	13.5212	13.381	1.45149	2.73491
434	WBGene00008930	F18A11.3	F18A11.3	UP	12.6745	12.6671	13.2827	13.3211	0.631163	1.54881
435	WBGene00008975	F20D1.3	F20D1.3	UP	13.0611	12.936	14.3194	14.096	1.20916	2.31203
436	WBGene00008980	F20D1.10	tag-299	UP	12.3608	12.6341	13.6778	13.8429	1.26288	2.39974
437	WBGene00008999	F21A10.2	F21A10.2	UP	10.9762	10.833	12.1906	12.2768	1.3291	2.51245
438	WBGene00009014	F21D5.9	F21D5.9	UP	8.07087	8.09574	9.07827	9.07355	0.992603	1.98977
439	WBGene00009020	F21D9.6	F21D9.6	UP	11.0378	11.4388	12.8244	13.1503	1.74907	3.36141
440	WBGene00009041	F22B5.3	cut-3	UP	6.60558	6.64746	9.55925	9.18306	2.74463	6.70219
441	WBGene00009152	F26D2.14	F26D2.14	UP	6.60558	6.7923	7.69153	7.74971	1.02168	2.03028
442	WBGene00009156	F26D10.12	clec-196	UP	12.0645	11.919	13.1639	13.3096	1.245	2.37019
443	WBGene00009180	F26H11.2	nurf-1	UP	13.8497	14.0681	15.1968	15.5169	1.39796	2.63528
444	WBGene00009212	F28D1.2	F28D1.2	UP	11.8803	12.0403	13.1981	13.1095	1.1935	2.28707
445	WBGene00009257	F29G6.1	F29G6.1	UP	5.66739	5.54189	6.6454	6.52196	0.979039	1.97115
446	WBGene00009291	F31D4.4	clec-264	UP	10.2708	10.5355	12.0997	12.0024	1.64792	3.13381
447	WBGene00009304	F32A7.3	eva-1	UP	6.33512	6.7923	8.02331	8.36448	1.63018	3.09552
448	WBGene00009306	F32A7.5	F32A7.5	UP	10.2819	10.0896	11.8103	11.7048	1.57177	2.97269
449	WBGene00009342	F32H2.5	fasn-1	UP	11.686	11.5696	13.435	13.3276	1.75352	3.3718
450	WBGene00009343	F32H2.6	F32H2.6	UP	11.2698	11.2291	12.7201	12.906	1.56357	2.95584
451	WBGene00009361	F33E2.5	F33E2.5	UP	11.3452	11.3013	12.6095	12.6413	1.30212	2.4659
452	WBGene00009371	F33H2.8	F33H2.8	UP	8.6517	8.67962	9.91858	9.89698	1.24212	2.36546
453	WBGene00009399	F35C5.11	F35C5.11	UP	6.12034	6.29453	7.52045	7.48762	1.2966	2.45649
454	WBGene00009428	F35E12.4	F35E12.4	UP	8.50667	8.50987	9.66506	9.77558	1.21205	2.31666
455	WBGene00009503	F37A8.5	F37A8.5	UP	7.17571	6.91516	8.58678	8.5088	1.50236	2.83305
456	WBGene00009512	F37H8.3	F37H8.3	UP	11.4811	11.5515	13.6524	13.7563	2.18806	4.55691
457	WBGene00009552	F39B1.1	piki-1	UP	10.3215	10.2376	11.1549	11.1173	0.856566	1.81072
458	WBGene00009628	F42D1.2	tatn-1	UP	8.98114	9.07809	11.9219	10.7371	2.29988	4.92417
459	WBGene00009660	F43G6.8	F43G6.8	UP	10.8375	11.0097	12.0212	11.99	1.08203	2.11701
460	WBGene00009691	F44E5.4	F44E5.4	UP	11.2468	11.6709	13.8769	13.5538	2.25653	4.7784
461	WBGene00009698	F44F1.6	F44F1.6	UP	11.0097	11.5196	12.7459	13.0422	1.62942	3.09388
462	WBGene00009729	F45E10.2	F45E10.2	UP	9.89715	9.99952	11.4294	11.3486	1.44064	2.71441
463	WBGene00009791	F46F3.3	F46F3.3	UP	5.65308	5.8526	6.86713	6.96159	1.16152	2.23693
464	WBGene00009793	F46F6.2	pkn-1	UP	12.4683	12.6	13.6986	13.8106	1.22041	2.33013
465	WBGene00009811	F47B8.10	F47B8.10	UP	7.13153	7.28244	9.99563	10.0212	2.80145	6.97139
466	WBGene00009813	F47B10.2	haly-1	UP	11.6665	11.9586	14.2322	14.0202	2.31367	4.97145
467	WBGene00009823	F47G4.2	gadr-6	UP	12.0679	12.1479	13.2078	13.4035	1.1978	2.29389
468	WBGene00009827	F47G4.6	hmg-6	UP	11.5384	11.6901	13.3073	13.349	1.7139	3.28045
469	WBGene00009926	F52B11.3	noah-2	UP	9.27913	9.30041	11.2242	10.9958	1.8202	3.53129
470	WBGene00009939	F52F12.6	ztf-11	UP	11.4965	11.389	12.552	12.4429	1.05471	2.0773
471	WBGene00009947	F52H3.5	F52H3.5	UP	10.7752	10.8415	12.0476	12.0724	1.25166	2.38116
472	WBGene00009957	F53B2.8	F53B2.8	UP	9.26814	9.23574	10.0143	10.0848	0.797594	1.7382
473	WBGene00009982	F53F1.4	F53F1.4	UP	8.07425	7.36899	10.3296	10.2608	2.57356	5.95278
474	WBGene00009983	F53F1.5	cut-2	UP	6.69134	6.12034	9.85083	9.13207	3.08561	8.48909
475	WBGene00010019	F54B8.4	F54B8.4	UP	10.2408	10.3892	12.3766	12.3339	2.04024	4.11314
476	WBGene00010051	F54D5.5	F54D5.5	UP	12.9919	13.0244	13.7992	13.9103	0.846632	1.7983
477	WBGene00010057	F54D5.15	F54D5.15	UP	6.52017	6.52196	7.18813	7.20429	0.675142	1.59675
478	WBGene00010069	F54F11.1	F54F11.1	UP	8.52901	8.87108	10.2992	10.3581	1.62859	3.09211
479	WBGene00010174	F56H9.2	F56H9.2	UP	16.031	16.0601	16.9777	17.0665	0.976552	1.96776
480	WBGene00010199	F57C7.1	bet-2	UP	8.83374	8.7871	9.7379	9.76875	0.942899	1.92239
481	WBGene00010221	F57G12.1	F57G12.1	UP	12.5051	12.339	14.0769	14.1498	1.69125	3.22937
482	WBGene00010228	F58A4.5	clec-161	UP	6.63122	6.62038	7.73734	8.03651	1.26113	2.39683
483	WBGene00010244	F58D5.5	F58D5.5	UP	9.92191	9.86095	11.0166	11.09	1.1619	2.23751
484	WBGene00010262	F58E10.7	F58E10.7	UP	9.99082	10.1917	12.6739	12.335	2.4132	5.32654
485	WBGene00010269	F58G1.7	F58G1.7	UP	6.80677	6.9459	7.86887	7.89474	1.00548	2.00761
486	WBGene00010288	F58H1.5	F58H1.5	UP	10.9652	10.9467	11.9112	12.044	1.02169	2.0303
487	WBGene00010290	F58H1.7	F58H1.7	UP	9.78838	10.1434	12.5936	12.4454	2.55359	5.87095
488	WBGene00010291	F58H10.1	F58H10.1	UP	9.94161	10.4138	11.8798	12.0665	1.79546	3.47125
489	WBGene00010337	F59F4.2	F59F4.2	UP	12.4158	12.4114	13.4779	13.4472	1.04889	2.06894
490	WBGene00010341	F59F5.2	glo-3	UP	9.27214	9.32488	10.0931	10.1014	0.798713	1.73955
491	WBGene00010374	H08M01.2	rga-5	UP	6.24599	6.15566	7.22242	7.17452	0.997646	1.99674
492	WBGene00010423	H36L18.1	H36L18.1	UP	7.46037	7.62097	8.97877	9.01234	1.45489	2.74135
493	WBGene00010444	K01A6.2	magi-1	UP	11.8752	11.8137	12.706	12.6531	0.835057	1.78393
494	WBGene00010479	K01G5.8	K01G5.8	UP	14.4523	14.4617	15.098	15.0769	0.630455	1.54805
495	WBGene00010558	K04D7.4	ptp-4	UP	8.77635	9.02686	10.2809	10.3927	1.4352	2.70419
496	WBGene00010573	K04H4.2	K04H4.2	UP	6.31285	6.30859	7.7389	7.84321	1.48034	2.79014
497	WBGene00010575	K04H4.7	flp-25	UP	8.21833	8.33716	9.81838	10.1292	1.69605	3.24013
498	WBGene00010640	K07F5.16	K07F5.16	UP	10.048	10.0413	11.5082	11.5477	1.48328	2.79583
499	WBGene00010652	K08C9.5	K08C9.5	UP	6.22451	6.35516	7.50078	7.69284	1.30698	2.47423
500	WBGene00010674	K08E7.6	K08E7.6	UP	5.61679	5.71617	6.67058	6.74793	1.04277	2.06018
501	WBGene00010700	K09A9.1	nipi-3	UP	11.3025	11.5095	13.0668	13.2642	1.75947	3.38574
502	WBGene00010708	K09A11.5	phf-33	UP	6.58886	6.72778	7.74971	7.87107	1.15207	2.22232
503	WBGene00010742	K10D6.2	K10D6.2	UP	9.90731	10.48	11.8714	11.9852	1.73465	3.32798
504	WBGene00010792	K12G11.6	K12G11.6	UP	7.98893	7.92911	8.94492	9.12407	1.07548	2.10742
505	WBGene00010822	M01G12.9	M01G12.9	UP	8.33224	8.45807	9.52399	9.78013	1.25691	2.38983
506	WBGene00010825	M01G12.14	M01G12.14	UP	8.66606	8.64242	10.5534	10.4185	1.83171	3.55959
507	WBGene00010837	M03B6.5	M03B6.5	UP	8.6555	8.53584	9.58998	9.7053	1.05197	2.07335
508	WBGene00010838	M03C11.1	M03C11.1	UP	9.92373	9.92024	10.5456	10.5216	0.611631	1.52799
509	WBGene00010848	M04B2.6	M04B2.6	UP	9.63048	9.40387	10.6786	10.5789	1.11153	2.16075
510	WBGene00010868	M04G12.4	somi-1	UP	9.54803	9.62327	10.3482	10.3537	0.765313	1.69974
511	WBGene00010898	M28.7	nphp-1	UP	7.16684	7.21523	8.30562	8.53289	1.22822	2.34278
512	WBGene00010902	M79.2	M79.2	UP	10.6447	10.945	12.0989	12.0646	1.28689	2.44002
513	WBGene00010935	M163.1	M163.1	UP	10.7016	10.7449	12.6392	12.4645	1.82862	3.55197
514	WBGene00010993	R03E1.2	R03E1.2	UP	11.6393	11.6136	12.4632	12.4176	0.813976	1.75805
515	WBGene00011049	R06A4.6	sdz-26	UP	10.0691	10.0306	10.6677	10.6966	0.632323	1.55006
516	WBGene00011070	R06F6.7	R06F6.7	UP	7.96668	8.10531	9.24262	9.15128	1.16095	2.23605
517	WBGene00011077	R07B1.5	R07B1.5	UP	6.2716	6.15566	7.07125	7.04137	0.842677	1.79337
518	WBGene00011103	R07E3.2	R07E3.2	UP	10.1119	10.1132	10.7096	10.7626	0.623506	1.54061
519	WBGene00011104	R07E3.3	cut-5	UP	6.63933	6.9341	8.78874	8.62625	1.92078	3.78628
520	WBGene00011116	R07E5.10	pdcd-2	UP	13.0668	13.0873	13.8049	13.852	0.751374	1.6834
521	WBGene00011141	R08B4.5	R08B4.5	UP	8.4373	8.74919	11.2852	10.769	2.43386	5.40337
522	WBGene00011186	R10D12.5	clec-226	UP	5.54567	5.62778	6.53764	6.63502	0.999603	1.99945
523	WBGene00011231	R11A5.3	R11A5.3	UP	13.3869	13.3537	14.0724	14.1334	0.732609	1.66164
524	WBGene00011254	R12G8.1	R12G8.1	UP	6.01349	6.47853	9.24109	8.83523	2.79215	6.92659
525	WBGene00011263	R13H4.5	R13H4.5	UP	8.59649	8.77851	9.87207	9.89239	1.19473	2.28902
526	WBGene00011288	R102.1	R102.1	UP	6.63933	6.56848	8.2806	8.00665	1.53972	2.90738
527	WBGene00011314	T01B7.9	T01B7.9	UP	6.77917	6.88026	7.63519	7.66828	0.822018	1.76788
528	WBGene00011326	T01D3.1	T01D3.1	UP	6.76366	6.99993	8.49054	8.55023	1.63859	3.11362
529	WBGene00011328	T01D3.3	T01D3.3	UP	6.62038	6.49468	8.19937	8.3781	1.73121	3.32006
530	WBGene00011360	T01H10.7	lgc-18	UP	5.75301	5.6567	6.95891	7.03033	1.28977	2.44488
531	WBGene00011392	T03D8.3	sbt-1	UP	10.6034	10.8304	11.7755	11.81	1.07583	2.10793
532	WBGene00011428	T04C12.3	T04C12.3	UP	9.56499	9.97166	11.1806	11.2113	1.42767	2.69012
533	WBGene00011475	T05D4.2	T05D4.2	UP	11.8451	11.8753	12.7043	12.7107	0.847293	1.79912
534	WBGene00011479	T05E11.2	T05E11.2	UP	8.58022	8.62083	9.28677	9.27341	0.679572	1.60166
535	WBGene00011494	T05F1.9	T05F1.9	UP	7.08835	7.34234	9.08235	9.2673	1.95948	3.88921
536	WBGene00011508	T05H10.3	T05H10.3	UP	9.00037	9.15934	10.6646	10.4993	1.50208	2.8325
537	WBGene00011531	T06D10.1	rsbp-1	UP	9.72139	9.80641	10.8072	10.9569	1.11816	2.1707
538	WBGene00011548	T06G6.6	T06G6.6	UP	5.417	5.12842	6.72072	6.81965	1.49748	2.82349
539	WBGene00011551	T06G6.12	T06G6.12	UP	8.55786	8.79512	9.85351	10.1136	1.30708	2.4744
540	WBGene00011590	T07F10.4	bus-19	UP	6.40222	6.40124	7.24367	7.16219	0.801196	1.74255
541	WBGene00011671	T10B9.1	cyp-13A4	UP	11.3484	11.4009	12.622	12.3891	1.13082	2.18983
542	WBGene00011677	T10B9.8	cyp-13A1	UP	7.49772	7.56372	8.23945	8.25678	0.717395	1.64421
543	WBGene00011704	T11A5.5	sdz-31	UP	9.34559	9.36081	10.0247	10.0716	0.69493	1.61881
544	WBGene00011705	T11A5.6	T11A5.6	UP	7.41486	7.76788	8.90229	9.18946	1.45451	2.74063
545	WBGene00011737	T12G3.1	sqst-1	UP	12.8786	13.0518	14.5364	14.6311	1.61858	3.07072
546	WBGene00011763	T14B1.1	T14B1.1	UP	7.07451	7.16075	8.37375	8.32934	1.23391	2.35204
547	WBGene00011839	T19C4.5	T19C4.5	UP	10.2708	10.5372	12.1332	11.8357	1.58044	2.99061
548	WBGene00011888	T21B10.6	cutl-15	UP	7.45106	7.73378	9.12816	9.19687	1.57009	2.96924
549	WBGene00011904	T21H8.1	hlb-1	UP	8.91117	8.99294	9.9654	9.94976	1.00552	2.00767
550	WBGene00011905	T21H8.5	T21H8.5	UP	6.90736	6.7158	7.85723	7.94769	1.09088	2.13003
551	WBGene00011927	T22C8.6	T22C8.6	UP	7.60959	7.46856	8.98572	8.70692	1.30724	2.47468
552	WBGene00011977	T24B8.3	T24B8.3	UP	11.3032	11.3574	12.7181	12.6841	1.3708	2.58613
553	WBGene00011978	T24B8.4	T24B8.4	UP	8.93516	8.96813	10.0433	9.91382	1.02693	2.03768
554	WBGene00011995	T24F1.3	rsf-1	UP	11.4479	11.6956	12.9735	13.0162	1.42309	2.68159
555	WBGene00012005	T24H10.7	jun-1	UP	8.44828	8.76543	9.99415	9.95067	1.36556	2.57676
556	WBGene00012098	T27E9.8	fbxb-86	UP	7.34614	7.28244	8.02331	8.046	0.720364	1.6476
557	WBGene00012107	T27F6.8	T27F6.8	UP	8.06152	8.13069	9.88265	9.58452	1.63748	3.11121
558	WBGene00012113	T28B8.1	T28B8.1	UP	12.3973	12.8059	14.4185	14.4404	1.82783	3.55004
559	WBGene00012116	T28B8.5	del-4	UP	6.96869	7.14051	8.31673	8.41081	1.30917	2.47799
560	WBGene00012131	T28F3.5	T28F3.5	UP	6.40222	6.29022	7.22242	7.2461	0.888041	1.85066
561	WBGene00012158	VW06B3R.1	ucr-2.1	UP	13.0475	12.8443	14.1086	14.0769	1.14683	2.21426
562	WBGene00012186	W01F3.3	mlt-11	UP	9.81301	9.6617	12.1171	11.7528	2.19759	4.58712
563	WBGene00012194	W02A11.3	toe-4	UP	9.99829	9.90204	10.7473	10.7993	0.823125	1.76923
564	WBGene00012216	W02D9.10	W02D9.10	UP	8.68135	8.68638	10.3149	10.0393	1.49322	2.81516
565	WBGene00012226	W03G11.4	W03G11.4	UP	9.15178	9.28704	10.3106	10.3736	1.12269	2.17753
566	WBGene00012228	W03H9.2	W03H9.2	UP	6.0357	5.97169	6.73439	6.70529	0.716139	1.64278
567	WBGene00012239	W04A8.4	W04A8.4	UP	12.9608	13.4424	14.6496	14.8637	1.55502	2.93837
568	WBGene00012255	W04G3.1	lpr-6	UP	8.30115	9.03829	10.268	10.6596	1.79409	3.46796
569	WBGene00012256	W04G3.2	lpr-5	UP	7.57225	7.77849	9.04696	9.23455	1.46539	2.76138
570	WBGene00012257	W04G3.3	lpr-4	UP	6.62038	7.40755	8.91895	8.79837	1.84469	3.59177
571	WBGene00012261	W04G3.8	lpr-3	UP	10.4698	10.2955	12.0242	12.0473	1.65311	3.1451
572	WBGene00012306	W06F12.2	W06F12.2	UP	9.35284	9.45277	10.7388	10.4911	1.21217	2.31685
573	WBGene00012307	W06F12.3	W06F12.3	UP	7.60492	7.97889	9.50693	9.2673	1.59521	3.02138
574	WBGene00012317	W06H12.1	ztf-6	UP	10.1976	10.2776	11.2183	11.4363	1.08976	2.12838
575	WBGene00012420	Y7A9D.1	Y7A9D.1	UP	10.9519	10.9744	12.7435	12.678	1.74759	3.35796
576	WBGene00012421	Y9C2UA.1	Y9C2UA.1	UP	7.73291	7.8818	8.94398	8.91418	1.12172	2.17607
577	WBGene00012443	Y15E3A.4	Y15E3A.4	UP	10.3324	10.4929	11.6762	11.629	1.24	2.36198
578	WBGene00012444	Y15E3A.5	Y15E3A.5	UP	12.173	12.4996	13.9002	14.1829	1.70522	3.26079
579	WBGene00012451	Y17D7B.3	Y17D7B.3	UP	6.63933	6.50839	7.95814	8.20001	1.50522	2.83867
580	WBGene00012540	Y37A1B.7	Y37A1B.7	UP	5.60226	5.78582	7.70311	7.35896	1.837	3.57265
581	WBGene00012593	Y38E10A.15	nspe-7	UP	7.42005	7.53613	9.19918	8.82058	1.53179	2.89144
582	WBGene00012603	Y38E10A.25	nspe-6	UP	6.45221	6.42738	8.83837	8.782	2.37039	5.1708
583	WBGene00012621	Y38H6C.8	Y38H6C.8	UP	6.6581	6.63502	7.43461	7.54567	0.843578	1.7945
584	WBGene00012635	Y38H8A.1	Y38H8A.1	UP	8.54547	8.5882	9.66968	9.5974	1.0667	2.09464
585	WBGene00012757	Y41C4A.11	Y41C4A.11	UP	9.29674	9.95222	12.1632	12.3493	2.63174	6.19772
586	WBGene00012763	Y41E3.3	atln-2	UP	6.31285	6.30859	7.27206	7.22949	0.940054	1.9186
587	WBGene00012764	Y41E3.6	Y41E3.6	UP	6.74793	6.67565	8.17606	7.94161	1.34704	2.5439
588	WBGene00012769	Y41E3.11	Y41E3.11	UP	7.50875	7.64871	8.6317	8.53973	1.00699	2.00971
589	WBGene00012796	Y43F4A.1	Y43F4A.1	UP	8.44177	8.50987	9.78338	10.0158	1.42375	2.68282
590	WBGene00012813	Y43F8B.2	Y43F8B.2	UP	12.357	12.6925	13.9918	14.1479	1.54515	2.91835
591	WBGene00012826	Y43F8C.4	dyf-19	UP	6.70529	6.62038	7.59662	7.64062	0.955789	1.93964
592	WBGene00012899	Y46G5A.7	Y46G5A.7	UP	12.0799	12.3515	13.4684	13.6143	1.32566	2.50647
593	WBGene00012909	Y46G5A.19	spds-1	UP	10.1885	10.3088	11.8266	11.9945	1.66187	3.16426
594	WBGene00012961	Y47H10A.5	Y47H10A.5	UP	8.3937	8.70992	10.1425	9.89865	1.46878	2.76788
595	WBGene00013082	Y51A2D.15	grdn-1	UP	8.76292	8.72571	10.1897	10.3353	1.5182	2.86433
596	WBGene00013098	Y51H4A.1	Y51H4A.1	UP	8.80576	9.12046	10.1706	10.2629	1.25365	2.38444
597	WBGene00013145	Y53C12B.6	cutl-2	UP	10.2232	10.2782	11.6501	11.7365	1.44263	2.71816
598	WBGene00013163	Y53F4B.17	Y53F4B.17	UP	6.96869	6.82916	8.37593	8.09013	1.3341	2.52119
599	WBGene00013173	Y53F4B.27	Y53F4B.27	UP	5.50666	5.54189	6.77768	6.60383	1.16648	2.24463
600	WBGene00013244	Y56A3A.33	Y56A3A.33	UP	11.1424	11.0476	12.382	12.3179	1.25496	2.3866
601	WBGene00013255	Y57A10A.10	Y57A10A.10	UP	8.96088	8.88077	10.6064	10.1856	1.47516	2.78014
602	WBGene00013263	Y57A10A.23	Y57A10A.23	UP	12.553	12.5938	13.5185	13.6457	1.0087	2.0121
603	WBGene00013266	Y57A10A.26	Y57A10A.26	UP	12.0613	12.2153	13.3329	13.4085	1.23241	2.34958
604	WBGene00013289	Y57G11A.1	tag-273	UP	7.07451	7.29172	8.42374	8.34256	1.20004	2.29746
605	WBGene00013312	Y57G11C.17	hhat-2	UP	8.88607	9.23574	10.3927	10.7394	1.50516	2.83855
606	WBGene00013335	Y57G11C.46	Y57G11C.46	UP	9.12596	9.07039	9.91524	10.0152	0.867049	1.82393
607	WBGene00013338	Y57G11C.49	lgc-8	UP	6.0357	5.97169	6.84648	6.94722	0.893154	1.85723
608	WBGene00013347	Y59A8B.10	Y59A8B.10	UP	13.3147	13.3126	14.1147	14.1182	0.802802	1.74449
609	WBGene00013388	Y62F5A.10	Y62F5A.10	UP	7.47859	7.41378	9.76717	9.78479	2.3298	5.02735
610	WBGene00013403	Y63D3A.2	fbxb-100	UP	11.031	10.9367	12.3807	12.4996	1.45631	2.74406
611	WBGene00013404	Y63D3A.3	fbxb-101	UP	10.0144	9.91372	11.7944	11.8127	1.83945	3.57875
612	WBGene00013416	Y64G10A.7	Y64G10A.7	UP	7.52045	7.36435	9.25531	9.29364	1.83207	3.56049
613	WBGene00013458	Y67A10A.9	Y67A10A.9	UP	7.59578	7.55241	8.49898	8.53973	0.945265	1.92554
614	WBGene00013509	Y71A12B.12	Y71A12B.12	UP	11.646	11.5928	12.906	13.1586	1.41293	2.66277
615	WBGene00013511	Y71A12B.15	Y71A12B.15	UP	7.41486	7.49083	9.01681	9.07355	1.59234	3.01538
616	WBGene00013515	Y73F4A.2	Y73F4A.2	UP	8.84728	9.37307	10.7566	10.6052	1.57071	2.97051
617	WBGene00013585	Y80D3A.5	cyp-42A1	UP	7.61968	7.90082	9.19165	9.14367	1.40741	2.65261
618	WBGene00013602	Y87G2A.16	Y87G2A.16	UP	7.56462	7.7389	8.81116	9.01922	1.26343	2.40065
619	WBGene00013636	Y105C5A.12	Y105C5A.12	UP	7.07451	7.05233	8.96673	8.61127	1.72558	3.30713
620	WBGene00013672	Y105E8A.12	catp-1	UP	7.19942	7.2461	8.17606	8.05273	0.891633	1.85527
621	WBGene00013677	Y105E8A.19	Y105E8A.19	UP	12.2863	12.286	13.0384	13.0616	0.763842	1.69801
622	WBGene00013682	Y105E8A.25	Y105E8A.25	UP	10.8699	10.8092	11.9476	11.7758	1.02209	2.03085
623	WBGene00013692	Y105E8B.7	Y105E8B.7	UP	11.3844	11.477	12.3258	12.4083	0.936376	1.91371
624	WBGene00013733	Y111B2A.9	Y111B2A.9	UP	8.70217	8.39665	10.2821	10.1772	1.68024	3.2048
625	WBGene00013760	Y113G7B.9	srbc-34	UP	6.14341	6.0357	6.9459	7.03033	0.898553	1.8642
626	WBGene00013826	Y116F11B.10	Y116F11B.10	UP	9.17606	9.16056	9.80619	9.8233	0.646438	1.5653
627	WBGene00013842	ZC47.10	fbxa-34	UP	7.56462	7.82507	8.98752	9.24852	1.42317	2.68175
628	WBGene00013843	ZC47.12	fbxa-49	UP	7.77849	8.1922	9.37256	9.95159	1.67673	3.19703
629	WBGene00013844	ZC47.13	fbxa-50	UP	7.87724	8.13458	9.65319	9.98479	1.81308	3.51391
630	WBGene00013852	ZC101.3	hhat-1	UP	5.61679	5.73958	7.34998	6.97452	1.48407	2.79736
631	WBGene00013899	ZC443.4	ZC443.4	UP	9.68016	9.85449	10.88	10.9195	1.13243	2.19227
632	WBGene00013902	ZC455.1	ZC455.1	UP	6.50839	6.43796	7.72196	7.67086	1.22324	2.3347
633	WBGene00013923	ZK20.1	ghi-1	UP	7.52831	7.56462	9.36437	8.88932	1.58038	2.99049
634	WBGene00013949	ZK262.2	ZK262.2	UP	5.38281	5.62778	6.74793	6.6454	1.19136	2.28369
635	WBGene00013962	ZK287.1	ZK287.1	UP	8.30931	8.69262	10.0221	10.5202	1.77018	3.41096
636	WBGene00013964	ZK287.3	ZK287.3	UP	10.964	10.9486	12.6435	12.4703	1.60065	3.03279
637	WBGene00013970	ZK337.2	ZK337.2	UP	7.04137	7.06844	7.78995	7.81885	0.749497	1.68121
638	WBGene00013982	ZK512.1	ZK512.1	UP	9.02441	9.07103	10.2127	10.4149	1.26611	2.40512
639	WBGene00014024	ZK637.4	ZK637.4	UP	9.16201	9.10911	9.92024	9.91252	0.780824	1.71811
640	WBGene00014053	ZK669.3	ZK669.3	UP	10.8411	11.2315	12.647	12.5822	1.57833	2.98624
641	WBGene00014065	ZK673.11	ZK673.11	UP	6.5815	6.56848	7.43042	7.57225	0.926343	1.90045
642	WBGene00014125	ZK863.8	ZK863.8	UP	9.81986	10.091	11.6068	11.6493	1.67263	3.18795
643	WBGene00014145	ZK899.7	ZK899.7	UP	7.46037	7.48265	8.13585	8.12093	0.656886	1.57668
644	WBGene00014148	ZK909.3	ZK909.3	UP	11.89	12.1208	13.2969	13.5339	1.41002	2.65742
645	WBGene00014149	ZK909.5	fbxb-70	UP	9.90827	10.1235	11.1549	11.4179	1.2705	2.41246
646	WBGene00014156	ZK930.6	ZK930.6	UP	9.27674	9.47731	10.6389	10.749	1.31693	2.49135
647	WBGene00014175	ZK971.1	ZK971.1	UP	8.38803	8.45603	10.4717	10.3927	2.01014	4.02821
648	WBGene00014199	ZK1053.4	ZK1053.4	UP	11.6798	11.6455	12.665	12.8161	1.07788	2.11093
649	WBGene00014213	ZK1073.1	ZK1073.1	UP	9.64408	9.45936	10.552	10.5522	1.00034	2.00048
650	WBGene00014259	ZK1320.11	ZK1320.11	UP	11.3693	11.3475	12.2706	12.2584	0.906127	1.87401
651	WBGene00014492	R166.6	R166.6	UP	12.0481	12.0588	13.4636	13.3425	1.3496	2.54842
652	WBGene00014505	T05E11.9	T05E11.9	UP	12.473	12.7529	14.07	14.382	1.61303	3.05893
653	WBGene00014569	Y39G8C.3	bkip-1	UP	7.85024	7.92911	8.78992	8.91595	0.963266	1.94972
654	WBGene00014836	T09F5.12	T09F5.12	UP	10.5399	10.6344	12.4208	12.3908	1.81865	3.52752
655	WBGene00014858	W09C5.3	W09C5.3	UP	7.11861	7.04137	7.87179	7.82597	0.768894	1.70396
656	WBGene00014999	AH9.3	AH9.3	UP	11.2932	11.385	12.267	12.3843	0.986578	1.98148
657	WBGene00015112	B0281.5	B0281.5	UP	12.5904	12.5338	13.3304	13.2729	0.73958	1.66969
658	WBGene00015178	B0416.2	B0416.2	UP	6.73278	6.59441	8.03785	7.98388	1.34727	2.5443
659	WBGene00015181	B0416.5	B0416.5	UP	12.7298	12.7568	13.4835	13.442	0.71944	1.64654
660	WBGene00015182	B0416.7	B0416.7	UP	7.33339	7.50684	9.05815	9.31588	1.7669	3.40322
661	WBGene00015218	B0507.1	B0507.1	UP	7.19443	7.1956	7.88864	7.91356	0.706086	1.63137
662	WBGene00015268	BE0003N10.3	BE0003N10.3	UP	9.20328	9.44023	10.6841	11.0344	1.5375	2.90292
663	WBGene00015298	C01F1.3	C01F1.3	UP	9.71779	9.62844	11.254	11.1673	1.53756	2.90304
664	WBGene00015328	C02B10.3	C02B10.3	UP	8.8074	8.79239	10.0158	10.1102	1.26308	2.40008
665	WBGene00015330	C02B10.5	C02B10.5	UP	12.0664	12.0437	12.8452	12.9173	0.826193	1.773
666	WBGene00015339	C02E7.6	C02E7.6	UP	5.82433	6.52196	11.27	9.92505	4.42438	21.4719
667	WBGene00015409	C03H5.7	C03H5.7	UP	6.83695	6.70529	7.76216	7.85723	1.03858	2.0542
668	WBGene00015474	C05D9.7	C05D9.7	UP	12.669	12.7822	13.7113	13.6808	0.970426	1.95942
669	WBGene00015480	C05D10.4	C05D10.4	UP	9.26814	9.38411	10.175	10.1746	0.848709	1.80089
670	WBGene00015492	C05E11.1	lnp-1	UP	11.1394	11.1956	12.158	12.194	1.00856	2.0119
671	WBGene00015495	C05E11.6	C05E11.6	UP	8.30314	8.40861	9.35979	9.33566	0.99185	1.98873
672	WBGene00015496	C05E11.7	C05E11.7	UP	6.19797	6.30859	7.36843	7.38285	1.12236	2.17703
673	WBGene00015518	C06E1.1	C06E1.1	UP	11.4363	11.4837	12.5269	12.5381	1.07249	2.10307
674	WBGene00015541	C06E7.4	C06E7.4	UP	10.7827	10.9303	12.5486	12.7662	1.80083	3.4842
675	WBGene00015547	C06G1.4	ain-1	UP	10.6444	10.7092	12.0899	12.1407	1.43848	2.71035
676	WBGene00015548	C06G1.5	C06G1.5	UP	7.29276	7.27311	8.19937	8.29773	0.965619	1.9529
677	WBGene00015561	C07A12.7	C07A12.7	UP	11.5637	11.5729	13.1185	12.9528	1.46735	2.76513
678	WBGene00015569	C07D10.5	C07D10.5	UP	12.0679	12.2713	13.2647	13.3515	1.13848	2.20148
679	WBGene00015574	C07G3.2	irg-1	UP	7.86346	7.88339	9.41173	9.2073	1.43609	2.70586
680	WBGene00015593	C08E3.1	C08E3.1	UP	6.91938	6.8182	8.87193	8.59692	1.86564	3.64429
681	WBGene00015605	C08E3.13	C08E3.13	UP	7.45106	7.28695	9.97826	9.63909	2.43967	5.42517
682	WBGene00015613	C08F1.10	C08F1.10	UP	12.1068	12.2455	13.2402	13.4917	1.18977	2.28116
683	WBGene00015626	C09B9.1	C09B9.1	UP	6.76366	7.16813	8.45807	8.49651	1.5114	2.85086
684	WBGene00015687	C10G11.7	C10G11.7	UP	14.8771	14.9503	15.7014	15.7218	0.797861	1.73852
685	WBGene00015701	C11D2.3	C11D2.3	UP	7.56462	7.67227	8.59046	8.48604	0.919803	1.89186
686	WBGene00015705	C12D5.2	nhr-152	UP	9.00986	9.08818	10.1675	10.2537	1.16161	2.23706
687	WBGene00015748	C14A11.2	C14A11.2	UP	6.4666	6.75616	7.87724	8.00665	1.33056	2.51501
688	WBGene00015779	C14F11.2	C14F11.2	UP	11.0295	10.8879	11.9236	11.9127	0.959456	1.94458
689	WBGene00015781	C14F11.6	C14F11.6	UP	10.4024	10.2121	11.7991	11.7201	1.45237	2.73657
690	WBGene00015782	C14F11.7	C14F11.7	UP	6.92525	6.90311	8.04742	8.13069	1.17488	2.25774
691	WBGene00015799	C15H9.3	C15H9.3	UP	5.75301	6.07316	8.01838	7.97889	2.08555	4.24437
692	WBGene00015847	C16C8.9	C16C8.9	UP	4.91167	5.04342	6.47098	6.76291	1.63939	3.11535
693	WBGene00015926	C17H11.6	C17H11.6	UP	9.73873	9.69373	10.7004	10.6936	0.980766	1.97351
694	WBGene00015955	C18B2.4	C18B2.4	UP	11.4965	11.4097	12.5448	12.5009	1.06976	2.09909
695	WBGene00015969	C18C4.9	glb-6	UP	6.43796	6.52196	7.59835	7.69284	1.16563	2.24332
696	WBGene00015993	C18H7.1	C18H7.1	UP	5.94571	5.90464	7.77451	7.25561	1.58988	3.01025
697	WBGene00016003	C18H9.5	C18H9.5	UP	9.12046	9.4995	11.2315	11.1316	1.87158	3.65933
698	WBGene00016006	C23F12.1	fln-2	UP	6.67405	6.48889	8.38964	8.14099	1.68385	3.21283
699	WBGene00016009	C23F12.4	C23F12.4	UP	11.9044	11.9627	12.8557	12.9119	0.950232	1.93218
700	WBGene00016067	C24H10.1	C24H10.1	UP	9.55112	9.8742	11.0869	11.055	1.35829	2.56381
701	WBGene00016069	C24H10.3	C24H10.3	UP	6.91938	6.8182	8.28834	8.33588	1.44332	2.71946
702	WBGene00016071	C24H12.1	C24H12.1	UP	7.82507	7.80597	8.49474	8.52802	0.695864	1.61985
703	WBGene00016076	C24H12.7	C24H12.7	UP	9.57469	9.66351	10.5959	10.7779	1.06784	2.09629
704	WBGene00016080	C24H12.11	C24H12.11	UP	9.27454	9.31387	10.1118	10.2232	0.873275	1.83182
705	WBGene00016090	C25B8.7	aexr-2	UP	5.34336	5.417	7.16003	7.22949	1.81458	3.51758
706	WBGene00016104	C25F6.4	ddr-1	UP	7.68228	7.49083	8.59412	8.6133	1.01716	2.02393
707	WBGene00016106	C25F6.7	C25F6.7	UP	5.82433	5.78582	6.5394	6.62038	0.774813	1.71097
708	WBGene00016111	C25H3.1	C25H3.1	UP	7.70311	7.76216	8.97425	9.10582	1.3074	2.47495
709	WBGene00016115	C25H3.6	mdt-26	UP	10.5815	10.6321	11.8134	12.0094	1.30461	2.47017
710	WBGene00016175	C27H5.6	C27H5.6	UP	7.3706	7.63248	12.2074	11.952	4.57815	23.8869
711	WBGene00016239	C30A5.4	C30A5.4	UP	9.01681	9.01718	9.95459	9.96702	0.943809	1.9236
712	WBGene00016242	C30A5.10	C30A5.10	UP	5.60226	5.57625	6.65297	6.94722	1.21084	2.31472
713	WBGene00016272	C30G4.7	C30G4.7	UP	10.3927	10.4873	11.9679	11.7126	1.40031	2.63958
714	WBGene00016281	C31B8.4	C31B8.4	UP	7.17571	7.20318	8.68112	8.68257	1.4924	2.81357
715	WBGene00016304	C32B5.11	fbxc-41	UP	5.71947	5.78582	6.6581	6.7923	0.972559	1.96232
716	WBGene00016359	C33F10.13	fbxb-88	UP	11.29	11.4888	12.4683	12.6865	1.18797	2.27832
717	WBGene00016397	C34D4.1	C34D4.1	UP	8.06624	8.1518	9.01439	9.11137	0.953857	1.93704
718	WBGene00016407	C34D10.2	C34D10.2	UP	8.87538	8.82058	9.90581	9.7444	0.977126	1.96854
719	WBGene00016422	C34G6.6	noah-1	UP	11.0634	11.0677	12.7521	12.6796	1.65027	3.13892
720	WBGene00016462	C35E7.10	C35E7.10	UP	7.87724	7.88339	8.53194	8.51328	0.642293	1.56081
721	WBGene00016469	C36B7.6	C36B7.6	UP	11.7539	11.6262	12.5563	12.5656	0.870924	1.82883
722	WBGene00016496	C37C3.2	C37C3.2	UP	12.0302	12.0161	12.8413	12.9353	0.865168	1.82155
723	WBGene00016500	C37C3.8	tag-253	UP	11.5154	11.6772	12.6983	12.7571	1.13145	2.19079
724	WBGene00016514	C38C3.6	C38C3.6	UP	5.92206	6.0357	6.84648	6.85693	0.872826	1.83125
725	WBGene00016520	C39B5.2	C39B5.2	UP	13.2668	13.2459	14.3362	14.5125	1.16801	2.24701
726	WBGene00016547	C40A11.4	C40A11.4	UP	10.4604	10.4234	11.2574	11.306	0.839787	1.78979
727	WBGene00016553	C40A11.10	C40A11.10	UP	8.44886	8.42374	9.47263	9.53516	1.0676	2.09594
728	WBGene00016725	C46H3.2	C46H3.2	UP	9.648	9.55298	10.4321	10.4332	0.832185	1.78038
729	WBGene00016735	C46H11.11	fhod-1	UP	7.27206	7.38285	8.3434	8.56073	1.12461	2.18043
730	WBGene00016782	C49G7.4	phat-3	UP	9.40863	9.4963	10.9762	10.6566	1.36394	2.57387
731	WBGene00016783	C49G7.5	irg-2	UP	10.8087	11.3969	12.7442	13.0602	1.7994	3.48074
732	WBGene00016868	C52B9.8	C52B9.8	UP	11.5408	11.3495	12.5792	12.5503	1.11964	2.17292
733	WBGene00016898	C53C9.2	C53C9.2	UP	8.66606	9.03433	10.407	10.1405	1.42354	2.68242
734	WBGene00016996	D1005.2	D1005.2	UP	9.01681	9.27169	10.5715	10.6638	1.47344	2.77683
735	WBGene00017028	D1044.2	dex-1	UP	7.42947	7.46037	9.07572	8.86961	1.52774	2.88335
736	WBGene00017039	D1073.1	trk-1	UP	6.06519	6.0357	6.87695	6.94722	0.861636	1.8171
737	WBGene00017046	D2021.1	utx-1	UP	10.492	10.5313	11.2	11.2315	0.704089	1.62912
738	WBGene00017050	D2024.1	D2024.1	UP	8.015	8.20241	9.69361	10.0144	1.74528	3.3526
739	WBGene00017061	D2063.2	oac-12	UP	6.74793	6.59441	7.81631	7.90082	1.1874	2.27741
740	WBGene00017126	E04F6.6	E04F6.6	UP	11.1583	11.5426	12.7405	12.7566	1.39813	2.6356
741	WBGene00017133	EEED8.2	EEED8.2	UP	10.844	11.003	12.0952	12.178	1.21312	2.31839
742	WBGene00017184	F02G3.1	ncam-1	UP	10.9158	11.2154	12.5787	12.8395	1.64345	3.12412
743	WBGene00017258	F08F1.4	F08F1.4	UP	12.2816	12.3356	13.4419	13.2448	1.03471	2.0487
744	WBGene00017262	F08F3.4	F08F3.4	UP	12.3922	12.6462	14.3353	14.2222	1.75959	3.38602
745	WBGene00017270	F08F8.5	numr-1	UP	11.4342	12.0422	13.6505	13.9328	2.05343	4.15092
746	WBGene00017291	F09E5.14	F09E5.14	UP	10.2809	10.2355	10.9777	10.9305	0.695887	1.61988
747	WBGene00017307	F09F9.2	F09F9.2	UP	6.0357	6.35516	7.96057	7.71509	1.64239	3.12183
748	WBGene00017309	F09F9.4	F09F9.4	UP	6.01349	6.2716	7.47614	7.71509	1.45307	2.73789
749	WBGene00017338	F10D7.1	F10D7.1	UP	6.86019	6.85387	7.7389	7.80432	0.914581	1.88502
750	WBGene00017340	F10D7.3	F10D7.3	UP	9.79652	10.061	11.975	11.6868	1.90212	3.73762
751	WBGene00017353	F10E9.1	F10E9.1	UP	6.29022	6.35516	7.3945	7.33774	1.04343	2.06113
752	WBGene00017370	F10G7.6	F10G7.6	UP	5.23757	5.32126	6.52196	6.51265	1.23789	2.35853
753	WBGene00017376	F11C7.2	F11C7.2	UP	6.43796	6.64746	7.66919	7.81473	1.19925	2.2962
754	WBGene00017380	F11D5.1	F11D5.1	UP	9.32875	9.48748	10.9866	10.9819	1.57615	2.98172
755	WBGene00017381	F11D5.3	ddr-2	UP	8.80326	9.10481	10.3811	10.4159	1.44447	2.72163
756	WBGene00017382	F11D5.5	F11D5.5	UP	8.28175	8.38718	9.46553	9.35701	1.0768	2.10936
757	WBGene00017419	F13B9.1	F13B9.1	UP	11.0731	10.9429	11.9792	11.9474	0.955276	1.93895
758	WBGene00017421	F13B9.6	cutl-29	UP	9.00705	8.96813	10.2146	10.1136	1.17651	2.26029
759	WBGene00017423	F13C5.2	F13C5.2	UP	11.2362	11.2826	12.3292	12.3943	1.10233	2.14701
760	WBGene00017466	F14F9.3	F14F9.3	UP	9.85362	10.2633	11.6008	11.8641	1.67402	3.19104
761	WBGene00017467	F14F9.4	F14F9.4	UP	10.1147	10.5412	12.0602	12.2332	1.81877	3.52781
762	WBGene00017471	F14H12.3	F14H12.3	UP	9.7055	9.82551	11.4964	11.0659	1.51568	2.85933
763	WBGene00017551	F18A12.2	F18A12.2	UP	6.67405	6.64746	7.69446	7.66114	1.01705	2.02377
764	WBGene00017571	F18E9.5	jmjd-3.1	UP	9.10289	9.36272	10.415	10.5022	1.22582	2.33889
765	WBGene00017582	F18G5.6	F18G5.6	UP	10.6243	10.8538	12.093	12.0316	1.32323	2.50225
766	WBGene00017583	F19B10.1	F19B10.1	UP	12.5752	12.4974	13.7792	13.869	1.28775	2.44147
767	WBGene00017592	F19C7.2	F19C7.2	UP	11.8011	12.0986	13.6718	13.6328	1.70245	3.25453
768	WBGene00017594	F19C7.4	F19C7.4	UP	11.4118	11.8068	13.1097	12.995	1.4431	2.71905
769	WBGene00017637	F20D6.8	F20D6.8	UP	6.67405	6.80531	8.27715	8.29231	1.54505	2.91815
770	WBGene00017644	F20D12.5	exc-9	UP	10.7151	10.7452	11.4677	11.453	0.73025	1.65893
771	WBGene00017658	F21C10.9	F21C10.9	UP	5.97439	5.94571	7.08835	7.10257	1.13541	2.19681
772	WBGene00017666	F21E9.2	F21E9.2	UP	5.61679	5.6567	6.41045	6.49468	0.815821	1.7603
773	WBGene00017699	F22D3.2	flcn-1	UP	12.9477	12.9728	13.7904	13.9209	0.895431	1.86017
774	WBGene00017705	F22E5.6	F22E5.6	UP	7.54567	8.10531	9.42806	9.73535	1.75622	3.37811
775	WBGene00017722	F22F7.4	F22F7.4	UP	7.58739	7.59297	9.18363	9.07355	1.53841	2.90475
776	WBGene00017755	F23F12.9	zip-8	UP	13.2703	13.1951	14.056	14.0183	0.80441	1.74643
777	WBGene00017796	F25G6.1	F25G6.1	UP	7.52831	7.42848	8.27448	8.32425	0.82097	1.76659
778	WBGene00017814	F26A10.2	F26A10.2	UP	6.14341	6.17581	7.61147	7.46037	1.3763	2.59602
779	WBGene00017834	F26F12.3	F26F12.3	UP	10.9798	10.9762	12.377	12.3891	1.405	2.64817
780	WBGene00017868	F27E11.2	slc-28.2	UP	7.03191	6.91516	8.04435	7.91956	1.00842	2.01171
781	WBGene00017885	F28B3.4	F28B3.4	UP	7.85024	7.85186	8.92895	8.96773	1.09729	2.13952
782	WBGene00017901	F28E10.2	igeg-1	UP	9.26241	9.39692	10.4229	10.4286	1.09609	2.13774
783	WBGene00017907	F28F9.3	F28F9.3	UP	7.72448	7.68228	8.82717	8.84556	1.13298	2.19312
784	WBGene00017908	F28H1.1	F28H1.1	UP	12.1726	12.3889	13.5051	13.6817	1.31266	2.48399
785	WBGene00017910	F28H1.5	F28H1.5	UP	6.17581	6.19569	6.77917	6.80531	0.606488	1.52255
786	WBGene00017912	F29A7.2	fbxb-107	UP	10.7719	10.7337	11.5558	11.607	0.828652	1.77602
787	WBGene00017936	F30B5.7	F30B5.7	UP	8.54928	8.75818	9.84107	9.7938	1.16371	2.24032
788	WBGene00017950	F31E3.2	F31E3.2	UP	8.04936	8.03785	8.83291	8.76152	0.753616	1.68601
789	WBGene00017970	F32A5.4	F32A5.4	UP	11.4269	11.6764	12.6923	12.688	1.13852	2.20155
790	WBGene00017983	F32D1.3	F32D1.3	UP	8.60809	8.87108	10.1292	10.4639	1.55698	2.94236
791	WBGene00017991	F32E10.3	clec-180	UP	6.01349	6.09449	6.91803	7.03033	0.920191	1.89237
792	WBGene00018041	F35D2.3	F35D2.3	UP	11.0852	11.1464	11.9679	11.9903	0.863287	1.81918
793	WBGene00018103	F36H5.4	F36H5.4	UP	11.2488	11.2088	12.2624	12.3357	1.07024	2.09978
794	WBGene00018115	F36H9.7	F36H9.7	UP	6.35516	6.29022	7.14051	7.21523	0.85518	1.80898
795	WBGene00018173	F38B6.3	F38B6.3	UP	7.19942	7.13153	8.10988	8.17367	0.976298	1.96741
796	WBGene00018215	F39H12.4	igcm-1	UP	9.72488	10.1168	11.468	11.5837	1.60506	3.04208
797	WBGene00018259	F41B4.3	F41B4.3	UP	12.3006	12.5886	13.8405	14.0657	1.50843	2.84501
798	WBGene00018266	F41B5.10	nhr-183	UP	8.49054	8.64108	9.5193	9.52624	0.956965	1.94122
799	WBGene00018297	F41F3.3	F41F3.3	UP	8.67298	8.51179	12.5996	11.4016	3.40825	10.6166
800	WBGene00018304	F41G3.12	agr-1	UP	8.68135	8.55698	10.4969	10.3987	1.82863	3.55199
801	WBGene00018311	F41G4.8	F41G4.8	UP	8.74291	9.08818	10.3711	10.5202	1.53008	2.88801
802	WBGene00018355	F42G2.6	ceh-86	UP	10.8681	10.9279	11.8998	11.9306	1.01716	2.02393
803	WBGene00018376	F43C9.2	F43C9.2	UP	10.6161	11.0059	12.4081	12.5294	1.65774	3.15521
804	WBGene00018418	F44E2.4	F44E2.4	UP	6.76366	6.9341	8.19042	8.17046	1.33156	2.51674
805	WBGene00018459	F45D11.14	F45D11.14	UP	7.0632	6.93683	9.09198	8.60044	1.8462	3.59551
806	WBGene00018468	F45E4.3	tag-80	UP	7.19443	7.20318	9.17887	8.76995	1.7756	3.42381
807	WBGene00018487	F46C8.8	F46C8.8	UP	6.31285	6.29022	7.20545	7.25561	0.928994	1.90395
808	WBGene00018489	F46E10.2	F46E10.2	UP	11.3597	11.2037	12.5015	12.4841	1.2111	2.31514
809	WBGene00018492	F46E10.11	hpo-26	UP	9.93927	10.0925	11.5668	11.2179	1.37645	2.59628
810	WBGene00018520	F46H5.4	F46H5.4	UP	10.2009	10.2633	11.0344	11.1123	0.841272	1.79163
811	WBGene00018547	F47C12.2	clec-78	UP	7.14182	7.03743	8.50246	8.42643	1.37482	2.59335
812	WBGene00018565	F47E1.1	F47E1.1	UP	5.80522	5.80522	6.92221	7.08961	1.20069	2.2985
813	WBGene00018572	F47F6.1	lin-42	UP	8.92037	8.97555	9.79245	9.89529	0.895911	1.86078
814	WBGene00018579	F47G6.2	acs-16	UP	7.82783	7.89474	8.72181	8.69963	0.849435	1.8018
815	WBGene00018604	F48E3.3	uggt-1	UP	12.3731	12.5178	13.3754	13.4452	0.96483	1.95183
816	WBGene00018607	F48E3.8	F48E3.8	UP	6.77917	6.90311	7.95372	8.19398	1.23271	2.35008
817	WBGene00018655	F49H12.4	F49H12.4	UP	6.12034	6.12034	6.9095	6.92221	0.795514	1.7357
818	WBGene00018682	F52D1.1	aagr-4	UP	9.86766	9.92346	11.1677	11.1788	1.27769	2.4245
819	WBGene00018696	F52E1.8	pho-6	UP	8.18604	8.43269	10.1675	10.2766	1.9127	3.76513
820	WBGene00018699	F52E1.12	F52E1.12	UP	6.09695	6.05758	6.81474	6.85693	0.758574	1.69182
821	WBGene00018710	F52G3.1	F52G3.1	UP	9.88837	9.77349	10.9313	10.8982	1.08384	2.11967
822	WBGene00018716	F52H2.4	F52H2.4	UP	7.61234	7.76788	8.70692	8.70692	1.0168	2.02343
823	WBGene00018724	F53A9.1	F53A9.1	UP	11.8469	11.8771	13.5755	13.4044	1.62794	3.09072
824	WBGene00018725	F53A9.2	F53A9.2	UP	10.7133	10.6942	12.0966	11.7992	1.24416	2.3688
825	WBGene00018726	F53A9.3	F53A9.3	UP	5.75301	5.90464	6.84648	6.80531	0.997073	1.99595
826	WBGene00018727	F53A9.4	jbts-14	UP	7.14182	7.1922	8.4063	8.55314	1.31271	2.48407
827	WBGene00018729	F53A9.6	F53A9.6	UP	12.6444	12.6212	14.3478	14.0068	1.54447	2.91697
828	WBGene00018730	F53A9.7	F53A9.7	UP	12.8447	12.8627	14.4414	14.2536	1.49381	2.81632
829	WBGene00018742	F53B3.3	F53B3.3	UP	5.97439	5.99408	7.02238	6.96159	1.00775	2.01077
830	WBGene00018743	F53B3.5	F53B3.5	UP	10.5153	10.7858	11.8177	11.8931	1.20488	2.30518
831	WBGene00018750	F53C3.6	F53C3.6	UP	8.56589	9.03159	10.334	10.5538	1.64519	3.12789
832	WBGene00018763	F53F10.1	F53F10.1	UP	8.91117	8.95444	10.09	10.0009	1.11262	2.16238
833	WBGene00018787	F54A5.2	cutl-20	UP	10.5518	10.9006	12.1709	12.2942	1.50635	2.8409
834	WBGene00018803	F54D10.2	fbxa-24	UP	10.7878	11.3095	13.1748	13.168	2.12272	4.35514
835	WBGene00018861	F55A4.10	cutl-21	UP	9.267	9.73811	11.1757	11.4385	1.80456	3.49321
836	WBGene00018958	F56C11.6	F56C11.6	UP	10.3759	10.5804	12.1975	12.2637	1.75245	3.36931
837	WBGene00018965	F56D2.3	F56D2.3	UP	7.18569	7.33339	8.36938	8.49498	1.17264	2.25423
838	WBGene00018966	F56D2.5	F56D2.5	UP	10.4438	10.7665	12.1217	12.4891	1.70024	3.24954
839	WBGene00019023	F58A6.2	F58A6.2	UP	6.40222	6.53764	7.40308	7.5292	0.996213	1.99476
840	WBGene00019134	F59H6.3	F59H6.3	UP	11.4508	11.4217	12.5936	12.6324	1.17671	2.26061
841	WBGene00019173	H08J11.2	H08J11.2	UP	7.33774	7.0112	8.829	8.66729	1.57367	2.97662
842	WBGene00019188	H11E01.3	H11E01.3	UP	7.53211	7.46856	8.60022	8.59046	1.095	2.13613
843	WBGene00019272	H42K12.3	H42K12.3	UP	7.73291	7.76788	9.648	9.26481	1.70601	3.26258
844	WBGene00019278	K01A2.3	K01A2.3	UP	8.15863	8.29547	9.70442	9.94306	1.59669	3.02448
845	WBGene00019279	K01A2.4	K01A2.4	UP	7.95889	8.22775	9.50743	9.69439	1.50759	2.84335
846	WBGene00019282	K01A2.8	mps-2	UP	9.50812	9.51559	10.7176	10.6865	1.19021	2.28186
847	WBGene00019283	K01A2.9	K01A2.9	UP	6.40222	6.52196	7.45212	7.35349	0.940715	1.91948
848	WBGene00019285	K01A2.11	cbn-1	UP	5.8526	6.0357	7.62789	7.38285	1.56122	2.95103
849	WBGene00019310	K02E7.5	K02E7.5	UP	11.3954	11.6613	13.321	13.2969	1.78059	3.43568
850	WBGene00019311	K02E7.6	K02E7.6	UP	9.97265	9.99363	11.0427	11.1819	1.12916	2.18731
851	WBGene00019317	K02E10.1	K02E10.1	UP	9.68195	9.97674	11.2687	11.3691	1.48954	2.80799
852	WBGene00019318	K02E10.4	K02E10.4	UP	6.45846	6.32162	7.32438	7.33994	0.94212	1.92135
853	WBGene00019327	K02F3.4	zip-2	UP	13.193	13.3654	14.9544	15.102	1.74902	3.36131
854	WBGene00019407	K05F1.5	K05F1.5	UP	10.3192	10.1706	11.284	11.1872	0.990687	1.98713
855	WBGene00019426	K06A1.3	cutl-16	UP	10.7505	11.43	12.8033	12.8351	1.72897	3.3149
856	WBGene00019434	K06A5.8	nmtn-1	UP	6.9341	7.09485	7.96057	8.02743	0.979523	1.97181
857	WBGene00019448	K06C4.17	frpr-13	UP	6.98856	7.0112	7.72609	7.77681	0.751566	1.68362
858	WBGene00019466	K07B1.6	tos-1	UP	12.5622	12.5261	13.4428	13.4177	0.886093	1.84816
859	WBGene00019482	K07C11.10	K07C11.10	UP	6.52017	6.59441	7.51567	7.51851	0.959799	1.94504
860	WBGene00019507	K07H8.7	K07H8.7	UP	6.14341	6.15566	7.05233	6.9341	0.843677	1.79462
861	WBGene00019511	K08A2.1	K08A2.1	UP	11.5701	11.6346	12.5709	12.6566	1.01145	2.01594
862	WBGene00019514	K08B4.2	K08B4.2	UP	10.6955	10.5093	12.0482	12.0385	1.44097	2.71504
863	WBGene00019592	K09F6.9	K09F6.9	UP	7.40864	7.89474	9.41828	9.55183	1.83336	3.56366
864	WBGene00019593	K09F6.10	K09F6.10	UP	8.16615	8.40655	10.0959	10.2206	1.87189	3.66012
865	WBGene00019612	K10B3.6	K10B3.6	UP	9.43386	9.50024	10.8294	10.6898	1.29255	2.44961
866	WBGene00019615	K10B4.3	K10B4.3	UP	10.8258	10.989	11.975	12.0572	1.10865	2.15644
867	WBGene00019623	K10C9.1	K10C9.1	UP	8.15863	8.21121	8.94191	9.01922	0.795644	1.73585
868	WBGene00019624	K10C9.3	K10C9.3	UP	12.8579	12.8088	14.0492	13.9881	1.18528	2.27408
869	WBGene00019641	K10G6.4	K10G6.4	UP	7.22949	7.40111	8.48444	8.80146	1.32765	2.50993
870	WBGene00019686	K12H6.6	K12H6.6	UP	12.6064	12.6581	13.5546	13.6473	0.968694	1.95707
871	WBGene00019741	M02H5.3	nhr-201	UP	9.56591	9.54073	10.5861	10.7131	1.09628	2.13802
872	WBGene00019759	M03F4.6	M03F4.6	UP	7.57225	7.74971	8.8963	8.88932	1.23183	2.34864
873	WBGene00019760	M03F4.7	calu-1	UP	12.5819	12.574	13.9322	13.9301	1.3532	2.55478
874	WBGene00019815	R02C2.2	kin-34	UP	11.7459	11.792	12.651	12.7527	0.932903	1.90911
875	WBGene00019840	R02F11.2	R02F11.2	UP	6.38097	6.46427	8.64242	8.43521	2.1162	4.3355
876	WBGene00019844	R03E9.3	abts-4	UP	10.0111	10.0533	10.9282	10.8378	0.850766	1.80346
877	WBGene00019855	R03H10.2	R03H10.2	UP	8.30115	8.68112	10.0519	10.2131	1.64135	3.11958
878	WBGene00019872	R04E5.9	R04E5.9	UP	9.29855	9.3747	10.2543	10.3709	0.975956	1.96694
879	WBGene00019902	R05G6.10	R05G6.10	UP	10.9135	11.0962	12.385	12.1119	1.24361	2.3679
880	WBGene00019965	R08F11.1	R08F11.1	UP	6.7923	6.67565	7.87724	7.81885	1.11407	2.16455
881	WBGene00019968	R08F11.4	R08F11.4	UP	6.63933	6.82916	7.82597	7.74297	1.05022	2.07085
882	WBGene00020028	R12C12.8	R12C12.8	UP	10.751	10.7643	11.3922	11.3506	0.613764	1.53025
883	WBGene00020039	R12E2.14	R12E2.14	UP	7.89232	7.49083	10.4185	9.91654	2.47595	5.56332
884	WBGene00020040	R12E2.15	R12E2.15	UP	7.16684	6.58366	10.066	9.39001	2.85277	7.22385
885	WBGene00020051	R13A5.9	R13A5.9	UP	8.62083	8.95444	10.1168	10.2083	1.37489	2.59348
886	WBGene00020062	R13D11.8	nhr-270	UP	6.82109	7.0062	7.96811	8.08283	1.11182	2.16118
887	WBGene00020090	R119.5	R119.5	UP	8.81496	8.8963	10.1563	10.3747	1.40989	2.65718
888	WBGene00020104	R148.5	R148.5	UP	9.39481	9.17338	10.5921	10.4462	1.23507	2.35392
889	WBGene00020136	T01B6.4	T01B6.4	UP	6.09695	5.90464	7.57225	7.34461	1.45764	2.74658
890	WBGene00020156	T02B11.4	T02B11.4	UP	7.0112	7.60036	9.17887	9.03471	1.80101	3.48465
891	WBGene00020160	T02C5.3	igcm-3	UP	11.9957	12.0799	13.749	13.8533	1.76335	3.39486
892	WBGene00020188	T03F1.6	T03F1.6	UP	8.52118	8.43939	9.50938	9.36657	0.957691	1.9422
893	WBGene00020192	T03F1.11	T03F1.11	UP	9.18363	9.54703	10.9152	10.9028	1.54369	2.91538
894	WBGene00020194	T03G6.1	T03G6.1	UP	7.70311	8.31467	10.3046	10.3898	2.33834	5.05722
895	WBGene00020196	T03G11.3	T03G11.3	UP	7.11861	7.29728	8.99438	9.0585	1.8185	3.52713
896	WBGene00020204	T04B8.2	T04B8.2	UP	9.63252	9.58043	10.5592	10.6694	1.00781	2.01086
897	WBGene00020208	T04C4.1	T04C4.1	UP	5.71947	5.80522	6.5796	6.63851	0.846712	1.7984
898	WBGene00020216	T04G9.5	trap-2	UP	12.7228	12.6654	13.4403	13.4374	0.74474	1.67567
899	WBGene00020224	T05A7.7	T05A7.7	UP	8.80576	8.91117	10.1404	10.3275	1.37548	2.59455
900	WBGene00020236	T05B4.1	lgc-1	UP	6.69134	6.6581	7.4081	7.36336	0.711009	1.63695
901	WBGene00020242	T05B4.11	phat-5	UP	5.97439	6.17581	8.18106	7.5292	1.78002	3.43432
902	WBGene00020279	T06A1.4	glb-25	UP	6.82109	6.75616	7.685	7.73211	0.919927	1.89202
903	WBGene00020297	T07A9.9	T07A9.9	UP	12.7157	12.5896	13.6353	13.5831	0.956539	1.94065
904	WBGene00020368	T08H4.3	ast-1	UP	7.09896	7.25806	8.23945	8.27942	1.08093	2.11539
905	WBGene00020379	T09B4.5	T09B4.5	UP	13.4222	13.57	15.1712	15.1968	1.6879	3.22187
906	WBGene00020544	T17A3.7	fbxb-84	UP	12.1021	12.0783	12.6888	12.7245	0.616475	1.53312
907	WBGene00020587	T19H12.1	ugt-9	UP	7.76664	8.08587	9.26402	9.5931	1.5023	2.83295
908	WBGene00020617	T20D4.11	T20D4.11	UP	10.0295	9.99273	11.1684	10.9652	1.0557	2.07872
909	WBGene00020626	T20F5.4	T20F5.4	UP	7.42005	7.29172	8.79697	8.49148	1.28834	2.44247
910	WBGene00020672	T22B7.3	T22B7.3	UP	9.16201	9.5427	10.6828	10.7843	1.38122	2.60489
911	WBGene00020673	T22B7.4	T22B7.4	UP	11.1924	11.3047	12.1234	12.2228	0.924618	1.89818
912	WBGene00020698	T22F3.8	T22F3.8	UP	7.89776	8.1731	9.32545	9.18306	1.21883	2.32757
913	WBGene00020710	T23B3.2	T23B3.2	UP	12.7745	13.0036	14.3108	14.5357	1.53419	2.89626
914	WBGene00020747	T24A6.7	T24A6.7	UP	7.3277	7.60036	9.16343	9.49936	1.86737	3.64866
915	WBGene00020748	T24A6.8	nhr-221	UP	7.42319	7.42319	8.36499	8.3937	0.956151	1.94013
916	WBGene00020758	T24C4.2	T24C4.2	UP	9.94306	10.0742	11.0291	11.2129	1.11241	2.16207
917	WBGene00020800	T25D10.2	zig-10	UP	7.50875	7.77849	8.8963	9.27007	1.43957	2.71239
918	WBGene00020801	T25D10.4	T25D10.4	UP	10.733	10.6876	11.591	11.6327	0.901507	1.86802
919	WBGene00020833	T26C12.3	T26C12.3	UP	10.6317	10.5878	11.9955	12.0229	1.39945	2.63801
920	WBGene00020844	T27A10.2	T27A10.2	UP	6.82109	6.88622	7.76216	7.93504	0.994941	1.993
921	WBGene00020852	T27B7.6	nhr-228	UP	10.5268	10.6596	11.6146	11.7027	1.06546	2.09283
922	WBGene00020865	T27E4.7	T27E4.7	UP	10.5732	10.601	11.6766	11.608	1.05521	2.07802
923	WBGene00020867	T27F7.2	shc-2	UP	11.0585	11.4257	12.5218	12.6303	1.33395	2.52091
924	WBGene00020878	T28A11.16	T28A11.16	UP	7.13153	7.20896	8.23945	8.12093	1.00995	2.01384
925	WBGene00020881	T28A11.19	T28A11.19	UP	9.13029	9.09954	10.5815	10.45	1.40081	2.64049
926	WBGene00020912	W01A11.7	W01A11.7	UP	9.3961	9.46577	10.9232	10.8846	1.47301	2.776
927	WBGene00020921	W01C8.5	W01C8.5	UP	8.9505	9.03433	10.6492	10.5343	1.59929	3.02995
928	WBGene00020976	W03B1.7	oac-51	UP	6.86019	6.7158	8.41362	8.23146	1.53455	2.89698
929	WBGene00020985	W03D8.2	W03D8.2	UP	8.21833	8.3462	9.33774	9.23289	1.00305	2.00423
930	WBGene00021009	W03F11.6	afd-1	UP	6.84469	6.86791	7.52731	7.5379	0.676298	1.59803
931	WBGene00021019	W04B5.2	W04B5.2	UP	9.00037	9.02441	9.95252	10.0716	0.999676	1.99955
932	WBGene00021030	W04H10.1	W04H10.1	UP	7.0632	7.09896	7.83144	7.85024	0.759762	1.69321
933	WBGene00021050	W05H9.3	W05H9.3	UP	11.2154	11.4306	12.5302	12.5451	1.21468	2.32089
934	WBGene00021068	W06H8.6	W06H8.6	UP	8.8781	8.59508	10.3873	10.3369	1.62549	3.08548
935	WBGene00021095	W08F4.6	mlt-8	UP	8.13069	8.27194	9.94253	9.66218	1.60104	3.03361
936	WBGene00021121	W09G12.7	W09G12.7	UP	9.90334	9.98992	11.9375	11.2992	1.67171	3.18592
937	WBGene00021188	Y13C8A.1	Y13C8A.1	UP	12.4337	12.3337	13.3315	13.294	0.929039	1.90401
938	WBGene00021204	Y17G9B.7	fbxb-77	UP	9.75576	9.74218	10.6004	10.6151	0.858779	1.8135
939	WBGene00021333	Y34D9A.8	Y34D9A.8	UP	7.16684	7.24024	8.2632	8.36448	1.1103	2.1589
940	WBGene00021343	Y37B11A.1	cutl-23	UP	8.98857	9.25207	10.3398	10.4176	1.25838	2.39227
941	WBGene00021362	Y37E11AL.6	Y37E11AL.6	UP	7.78507	7.73378	8.91595	8.87538	1.13624	2.19807
942	WBGene00021369	Y37E11AR.2	siah-1	UP	9.34407	9.32293	10.977	10.5288	1.41938	2.67471
943	WBGene00021370	Y37E11AR.3	nape-2	UP	11.3712	11.3272	12.4263	12.3008	1.01434	2.01998
944	WBGene00021374	Y37E11B.1	Y37E11B.1	UP	9.80277	9.87652	10.6875	10.7465	0.877322	1.83696
945	WBGene00021396	Y38C1AA.5	cutl-24	UP	7.58739	7.81794	9.12046	9.37499	1.54506	2.91817
946	WBGene00021400	Y38C1AA.9	Y38C1AA.9	UP	8.25849	8.8963	10.1882	10.8384	1.93591	3.8262
947	WBGene00021407	Y38C1AB.5	Y38C1AB.5	UP	7.75718	7.70311	8.57849	8.56073	0.839461	1.78938
948	WBGene00021415	Y38F2AL.1	nsy-4	UP	7.63695	7.85186	9.16091	9.10481	1.38846	2.61798
949	WBGene00021435	Y39A3A.4	Y39A3A.4	UP	6.60558	6.66346	7.8931	8.06423	1.34415	2.5388
950	WBGene00021463	Y39G10AR.5	zeel-1	UP	10.4374	10.6289	11.7488	11.8899	1.28619	2.43883
951	WBGene00021464	Y39G10AR.6	ugt-31	UP	10.2588	10.3643	11.4078	11.4344	1.1096	2.15786
952	WBGene00021469	Y39G10AR.11	Y39G10AR.11	UP	9.59889	9.46931	10.6033	10.7643	1.14969	2.21866
953	WBGene00021485	Y40A1A.3	Y40A1A.3	UP	8.82717	8.88077	9.93546	10.2119	1.2197	2.32898
954	WBGene00021505	Y41D4A.3	Y41D4A.3	UP	10.9838	11.0561	12.0574	12.1287	1.07303	2.10384
955	WBGene00021525	Y41D4B.26	Y41D4B.26	UP	10.6201	10.4336	11.6988	11.6627	1.15387	2.22511
956	WBGene00021529	Y41G9A.5	Y41G9A.5	UP	8.54041	8.81614	10.8372	10.5054	1.99306	3.98079
957	WBGene00021557	Y45G5AM.5	Y45G5AM.5	UP	11.7664	11.6818	12.6646	12.6462	0.931252	1.90693
958	WBGene00021577	Y46B2A.2	Y46B2A.2	UP	6.21255	6.17581	7.05233	7.0104	0.83718	1.78655
959	WBGene00021601	Y46H3A.5	Y46H3A.5	UP	6.43796	6.33625	9.71991	8.9845	2.9651	7.8088
960	WBGene00021691	Y48G8AL.13	Y48G8AL.13	UP	12.8851	12.6783	13.8515	13.8039	1.04601	2.0648
961	WBGene00021709	Y49C4A.8	ugt-29	UP	11.2848	11.3984	12.7763	12.8039	1.44851	2.72927
962	WBGene00021724	Y49F6C.2	Y49F6C.2	UP	10.7151	10.7799	11.4561	11.4328	0.696952	1.62108
963	WBGene00021966	Y57G7A.2	Y57G7A.2	UP	11.8465	11.8282	12.8263	12.7469	0.949247	1.93087
964	WBGene00021977	Y58A7A.3	Y58A7A.3	UP	12.0992	12.6456	14.0541	14.287	1.7982	3.47786
965	WBGene00021978	Y58A7A.4	Y58A7A.4	UP	10.7027	11.1385	12.8149	13.0031	1.98841	3.968
966	WBGene00022013	Y60C6A.1	Y60C6A.1	UP	7.91727	7.09485	11.6527	10.6475	3.64403	12.5015
967	WBGene00022103	Y71D11A.1	cdh-12	UP	7.67795	7.5116	9.3271	9.16749	1.65252	3.14382
968	WBGene00022111	Y71F9AL.6	Y71F9AL.6	UP	10.4596	10.5478	11.3926	11.5314	0.958301	1.94302
969	WBGene00022129	Y71F9B.8	lron-11	UP	9.6607	9.89418	11.064	11.1695	1.33929	2.53026
970	WBGene00022139	Y71G12A.3	tub-2	UP	9.34726	9.22295	10.6548	10.4663	1.27546	2.42076
971	WBGene00022144	Y71G12B.4	pghm-1	UP	10.1235	10.2587	11.6309	11.5709	1.40976	2.65693
972	WBGene00022146	Y71G12B.6	Y71G12B.6	UP	10.911	10.9457	11.7809	11.9204	0.92222	1.89503
973	WBGene00022181	Y71H2AM.16	pho-9	UP	10.5092	10.4899	12.7615	12.1815	1.97195	3.92299
974	WBGene00022307	Y77E11A.2	Y77E11A.2	UP	11.6324	11.6941	13.2136	13.0625	1.47481	2.77948
975	WBGene00022328	Y82E9BL.12	Y82E9BL.12	UP	6.90736	7.08835	8.87538	8.81496	1.84731	3.59828
976	WBGene00022329	Y82E9BL.13	fbxa-79	UP	8.98433	9.30557	10.4267	10.723	1.42989	2.69426
977	WBGene00022370	Y92H12BR.4	Y92H12BR.4	UP	9.86766	9.70322	11.1132	11.0659	1.30414	2.46936
978	WBGene00022410	Y97E10C.1	Y97E10C.1	UP	7.34614	7.67227	9.12336	8.85957	1.48226	2.79387
979	WBGene00022417	Y102A11A.7	Y102A11A.7	UP	7.26505	7.21857	8.26677	8.38989	1.08652	2.12361
980	WBGene00022418	Y102A11A.8	igcm-4	UP	11.4818	11.5876	12.9957	13.0436	1.48495	2.79908
981	WBGene00022441	Y110A2AL.4	Y110A2AL.4	UP	11.0221	11.416	13.1854	13.3628	2.05504	4.15555
982	WBGene00022500	ZC8.4	lfi-1	UP	9.50494	9.45043	10.8646	10.5932	1.25121	2.3804
983	WBGene00022505	ZC21.3	ZC21.3	UP	5.75301	5.89227	6.92746	7.02238	1.15228	2.22265
984	WBGene00022550	ZC196.6	ZC196.6	UP	6.47669	6.56848	7.59393	7.90082	1.22479	2.33721
985	WBGene00022554	ZC204.2	duxl-1	UP	12.9446	12.9804	13.9055	14.0267	1.00359	2.00498
986	WBGene00022570	ZC239.12	sdz-35	UP	7.54567	8.07087	9.46096	9.74312	1.79377	3.4672
987	WBGene00022591	ZC328.1	cuti-1	UP	10.6147	10.5607	11.9219	11.9828	1.36465	2.57515
988	WBGene00022634	ZC581.7	ZC581.7	UP	7.50875	7.90601	9.23863	9.03021	1.42704	2.68894
989	WBGene00022647	ZK54.1	ZK54.1	UP	9.07302	9.00037	10.134	10.0835	1.07204	2.10241
990	WBGene00022692	ZK250.9	ZK250.9	UP	6.22451	6.19569	7.12889	7.0104	0.859545	1.81447
991	WBGene00022745	ZK470.2	ZK470.2	UP	12.1176	12.0265	13.5273	13.4734	1.42835	2.69138
992	WBGene00022781	ZK622.3	pmt-1	UP	13.1216	13.1193	13.8429	13.7804	0.691208	1.61464
993	WBGene00022824	ZK813.5	ZK813.5	UP	6.82109	7.0632	10.1262	9.92283	3.08236	8.46999
994	WBGene00022837	ZK993.1	ceh-45	UP	6.2716	6.35516	7.47614	7.4356	1.14249	2.20761
995	WBGene00022842	ZK994.6	ZK994.6	UP	6.35516	6.385	7.22242	7.20429	0.843273	1.79412
996	WBGene00022855	ZK1127.9	tcer-1	UP	11.3163	11.2563	12.6064	12.7078	1.37084	2.58622
997	WBGene00022904	C01B12.9	C01B12.9	UP	9.85552	9.83419	10.7148	10.6372	0.83114	1.77909
998	WBGene00022951	C30E1.9	C30E1.9	UP	13.0994	13.284	15.0156	15.3224	1.97732	3.93761
999	WBGene00023159	W06H8.5	W06H8.5	UP	11.4811	11.5196	13.622	13.6835	2.15244	4.4458
1000	WBGene00023209	ZC513.7	ZC513.7	UP	12.6291	12.5085	13.7351	13.684	1.1407	2.20488
1001	WBGene00023276	F25B4.3	F25B4.3	UP	6.31285	6.2716	7.30516	7.2461	0.983403	1.97712
1002	WBGene00023326	M03D4.5	M03D4.5	UP	9.23994	9.28552	10.0562	10.0085	0.769637	1.70484
1003	WBGene00023331	R13H7.3	R13H7.3	UP	8.20632	8.18513	8.88077	8.90341	0.696361	1.62041
1004	WBGene00023423	F43C1.7	F43C1.7	UP	9.05037	9.29869	10.864	11.4833	1.99912	3.99756
1005	WBGene00023470	Y39A3A.6	srz-87	UP	5.417	5.47455	6.41924	6.55314	1.04042	2.05682
1006	WBGene00023472	F16A11.5	F16A11.5	UP	7.22949	7.27311	8.2806	8.53051	1.15425	2.22569
1007	WBGene00043097	C02D5.4	C02D5.4	UP	12.6386	12.6346	13.5802	13.6112	0.959149	1.94416
1008	WBGene00043297	F28F5.4	F28F5.4	UP	7.19443	7.30305	8.49474	8.27942	1.13834	2.20128
1009	WBGene00043981	T14E8.4	T14E8.4	UP	5.34336	5.78582	7.55241	7.22494	1.82408	3.54082
1010	WBGene00044021	R02E4.2	R02E4.2	UP	6.61479	6.66346	7.54746	7.64062	0.954914	1.93846
1011	WBGene00044024	C35A5.11	C35A5.11	UP	5.23757	5.59848	7.22242	6.78536	1.58586	3.00187
1012	WBGene00044057	F18A11.7	F18A11.7	UP	8.44413	8.42115	9.24882	9.34336	0.863447	1.81938
1013	WBGene00044066	Y40B1B.3	fbxb-66	UP	11.5522	11.8508	13.0941	13.3255	1.50828	2.84471
1014	WBGene00044068	ZK867.1	syd-9	UP	8.18175	8.58022	9.98859	10.0946	1.66061	3.16151
1015	WBGene00044138	F31F6.8	sssh-1	UP	7.74144	7.80031	8.91287	9.04561	1.20837	2.31076
1016	WBGene00044143	K09E9.4	K09E9.4	UP	6.77917	6.8182	7.61781	7.58642	0.803432	1.74525
1017	WBGene00044147	M163.11	M163.11	UP	6.62038	6.55314	7.59393	7.79069	1.10555	2.15182
1018	WBGene00044200	H37A05.4	H37A05.4	UP	12.8351	12.7133	13.7238	13.7216	0.948543	1.92992
1019	WBGene00044238	C30H6.12	C30H6.12	UP	6.94722	7.14051	8.70217	8.70692	1.66068	3.16165
1020	WBGene00044245	F32A7.8	F32A7.8	UP	5.97439	5.94571	6.96022	6.92221	0.981162	1.97406
1021	WBGene00044302	F28E10.5	F28E10.5	UP	9.88341	10.0085	11.2036	11.1713	1.24148	2.3644
1022	WBGene00044304	F52B10.3	F52B10.3	UP	8.42844	8.55023	9.64033	9.75085	1.20625	2.30737
1023	WBGene00044359	C16C4.17	C16C4.17	UP	7.15319	7.15204	7.75047	7.71509	0.580165	1.49502
1024	WBGene00044379	F40H7.12	F40H7.12	UP	5.04342	5.32126	7.59393	6.77917	2.00421	4.0117
1025	WBGene00044387	C27A2.8	C27A2.8	UP	7.50875	7.67227	9.01195	9.27341	1.55217	2.93258
1026	WBGene00044412	F40H6.6	F40H6.6	UP	10.6029	10.4468	11.5032	11.5686	1.01104	2.01536
1027	WBGene00044439	Y51H7C.15	Y51H7C.15	UP	12.9923	12.9899	13.9719	14.0344	1.01206	2.01679
1028	WBGene00044442	T08A9.13	T08A9.13	UP	7.69446	7.94651	9.25763	9.09858	1.35762	2.56262
1029	WBGene00044500	T19E7.6	T19E7.6	UP	10.4975	10.5665	11.7966	11.6857	1.20918	2.31206
1030	WBGene00044526	T28A11.22	T28A11.22	UP	10.6405	10.7409	11.6149	11.7561	0.994814	1.99282
1031	WBGene00044567	C46C11.4	C46C11.4	UP	9.88085	9.89818	10.8345	10.8544	0.954931	1.93849
1032	WBGene00044623	T23F2.1	bus-8	UP	6.0357	6.07316	7.4815	7.57797	1.4753	2.78042
1033	WBGene00044641	T01D1.8	T01D1.8	UP	6.76366	6.8182	7.61968	7.60492	0.821373	1.76709
1034	WBGene00044670	K03D3.13	rac-3	UP	7.48969	7.14051	8.83588	8.93863	1.57215	2.97347
1035	WBGene00044681	T24C4.8	T24C4.8	UP	8.53584	8.66868	9.53664	9.49335	0.912741	1.88262
1036	WBGene00044698	K09F5.6	K09F5.6	UP	8.63482	8.55314	9.98859	9.89304	1.34684	2.54354
1037	WBGene00044725	R11G1.7	R11G1.7	UP	11.3565	11.3186	12.0829	12.134	0.770932	1.70637
1038	WBGene00044728	Y53F4B.45	Y53F4B.45	UP	14.1992	14.5491	16.6153	16.6679	2.26739	4.8145
1039	WBGene00044761	Y82E9BR.23	Y82E9BR.23	UP	7.99468	7.95306	9.01922	9.07355	1.07252	2.1031
1040	WBGene00044771	T23E7.5	T23E7.5	UP	6.09695	6.23143	7.42947	7.29385	1.19747	2.29337
1041	WBGene00045077	Y71A12B.18	Y71A12B.18	UP	6.83695	6.91516	7.97889	7.97889	1.10283	2.14776
1042	WBGene00045193	F53B2.10	F53B2.10	UP	6.7191	6.85387	7.79565	7.85499	1.03883	2.05456
1043	WBGene00045207	F13E9.14	F13E9.14	UP	6.35516	6.56848	8.32547	7.96601	1.68392	3.21299
1044	WBGene00045234	Y26D4A.17	Y26D4A.17	UP	5.88032	6.37054	7.96811	8.05802	1.88763	3.70028
1045	WBGene00045235	Y26D4A.18	Y26D4A.18	UP	6.15851	6.25767	7.77849	7.88339	1.62285	3.07982
1046	WBGene00045236	Y26D4A.19	Y26D4A.19	UP	5.2847	5.44607	6.47669	6.45456	1.10024	2.1439
1047	WBGene00045238	Y48G10A.7	rpr-1	UP	11.8356	11.824	13.7904	13.7012	1.91596	3.77365
1048	WBGene00045248	ZK180.7	ZK180.7	UP	8.22084	8.30259	9.90053	9.56998	1.47354	2.77702
1049	WBGene00045255	Y41D4B.27	nhr-146	UP	10.181	10.2512	11.1494	11.0374	0.877299	1.83693
1050	WBGene00045272	F59C12.4	F59C12.4	UP	12.5785	13.1108	15.0609	15.2253	2.29844	4.91925
1051	WBGene00045386	C02B4.4	C02B4.4	UP	7.65397	7.46037	9.08733	9.17687	1.57494	2.97922
1052	WBGene00045388	C38C6.8	C38C6.8	UP	12.0148	12.0407	13.2374	13.2081	1.19504	2.28951
1053	WBGene00045411	C25F9.11	C25F9.11	UP	9.03415	9.20115	11.2995	11.3156	2.18993	4.56283
1054	WBGene00045412	C25F9.12	C25F9.12	UP	7.08835	7.42848	8.57849	8.72912	1.39539	2.63059
1055	WBGene00045457	F33H12.7	F33H12.7	UP	10.9627	10.945	12.3451	12.1142	1.27576	2.42127
1056	WBGene00050875	ZK1025.7	bah-1	UP	5.78582	5.82738	6.53764	6.58537	0.754907	1.68752
1057	WBGene00050899	T10C6.15	T10C6.15	UP	6.73278	6.81139	9.29475	9.13672	2.44365	5.44017
1058	WBGene00050927	B0250.12	B0250.12	UP	9.76623	9.92346	11.0515	11.2185	1.29014	2.44553
1059	WBGene00077490	M03A1.8	M03A1.8	UP	8.74754	9.12076	10.4523	10.4647	1.52436	2.87659
1060	WBGene00077557	F15D3.9	F15D3.9	UP	6.47669	6.45221	7.18813	7.26505	0.76214	1.696
1061	WBGene00077593	C49G7.12	C49G7.12	UP	8.87305	9.28266	10.6426	11.0558	1.77136	3.41376
1062	WBGene00077697	F58E6.13	F58E6.13	UP	6.14341	6.17581	7.71252	7.48762	1.44046	2.71407
1063	WBGene00077761	F17C11.17	zip-9	UP	10.4252	10.1976	12.1524	12.174	1.85184	3.6096
1064	WBGene00077769	F33E2.10	F33E2.10	UP	5.65308	5.54189	6.7923	6.85693	1.22713	2.34102
1065	WBGene00194651	C33D9.13	C33D9.13	UP	12.1341	12.3121	13.3786	13.4604	1.19639	2.29166
1066	WBGene00194713	F19B10.13	F19B10.13	UP	10.1897	10.6932	11.9043	12.2544	1.63791	3.11215
1067	WBGene00195165	F57G4.11	F57G4.11	UP	5.71947	5.74983	6.80346	6.85693	1.09555	2.13695
1068	WBGene00195612	Y51H7C.16	Y51H7C.16	UP	6.49468	6.47853	7.06182	7.08454	0.586572	1.50167
1069	WBGene00206519	F36H5.13	F36H5.13	UP	10.149	10.2214	11.1017	11.2758	1.00357	2.00496
1070	WBGene00219283	F55H12.7	F55H12.7	UP	9.15084	9.09198	10.5029	10.4433	1.3517	2.55213
1071	WBGene00219369	R160.10	R160.10	UP	8.78218	8.72952	10.0015	9.96498	1.22738	2.34141
1072	WBGene00219492	Y53F4B.63	Y53F4B.63	UP	6.85387	6.88026	7.6629	7.69884	0.813804	1.75784
1073	WBGene00219758	Y49F6C.11	linc-11	UP	10.061	10.3008	11.3341	11.5107	1.24149	2.36442
1074	WBGene00220049	R106.7	R106.7	UP	12.2319	12.3187	13.4527	13.4508	1.17647	2.26023
1075	WBGene00235269	F59E12.15	F59E12.15	UP	11.945	11.89	12.8147	12.9542	0.966973	1.95473
1076	WBGene00000024	AC3.3	abu-1	DOWN	7.53613	7.41061	6.37054	6.17581	-1.20019	0.435217
1077	WBGene00000093	Y62E10A.5	agt-1	DOWN	11.226	11.3495	10.3581	10.3724	-0.92247	0.527605
1078	WBGene00000102	C12D8.10	akt-1	DOWN	10.9652	11.1316	10.1017	10.0423	-0.976392	0.508249
1079	WBGene00000118	Y69F12A.2	alh-12	DOWN	10.2009	10.4582	8.56642	8.70992	-1.69139	0.309628
1080	WBGene00000139	F25C8.2	amx-3	DOWN	9.23994	9.29035	7.98999	8.14443	-1.19793	0.435899
1081	WBGene00000177	K07A1.16	aqp-9	DOWN	9.17304	9.09607	7.8818	8.03862	-1.17435	0.443085
1082	WBGene00000206	F35G12.10	asb-1	DOWN	15.205	15.2157	14.4152	14.4742	-0.765635	0.588194
1083	WBGene00000212	ZK455.4	asm-2	DOWN	10.7027	10.9797	8.76519	9.18088	-1.86815	0.273925
1084	WBGene00000213	W03G1.7	asm-3	DOWN	10.9597	11.5584	8.61531	9.16749	-2.36765	0.193761
1085	WBGene00000215	T18H9.2	asp-2	DOWN	14.2628	14.168	11.2357	11.4086	-2.89331	0.134595
1086	WBGene00000216	H22K11.1	asp-3	DOWN	16.3863	15.8364	14.6263	14.3704	-1.61305	0.326907
1087	WBGene00000218	F21F8.3	asp-5	DOWN	15.3094	15.3724	14.2154	14.032	-1.21721	0.430114
1088	WBGene00000239	C05D2.4	bas-1	DOWN	8.85724	9.04867	7.45212	7.64871	-1.40254	0.378262
1089	WBGene00000271	F45E12.2	brf-1	DOWN	9.91925	10.0981	8.8074	8.9215	-1.14423	0.452432
1090	WBGene00000302	C56A3.7	cav-2	DOWN	9.26371	9.36437	7.25695	7.399	-1.98607	0.252426
1091	WBGene00000374	C01F6.3	cyp-31A1	DOWN	9.4778	9.46802	8.21467	8.3937	-1.16873	0.444814
1092	WBGene00000392	F49E8.4	cdd-2	DOWN	12.2501	12.3072	11.5032	11.5046	-0.774756	0.584488
1093	WBGene00000473	F46F11.2	cey-2	DOWN	17.2524	17.3017	16.5956	16.5883	-0.685117	0.621955
1094	WBGene00000474	M01E11.5	cey-3	DOWN	16.6573	16.7316	15.5961	15.6677	-1.06253	0.478791
1095	WBGene00000492	F59C6.7	che-13	DOWN	6.09695	6.15566	5.38281	5.38281	-0.743496	0.59729
1096	WBGene00000530	E04F6.11	clh-3	DOWN	7.25927	7.20318	6.47098	6.47291	-0.759282	0.59079
1097	WBGene00000539	F07B10.1	cln-3.1	DOWN	7.49288	7.42005	6.17812	6.2716	-1.23161	0.425843
1098	WBGene00000550	F55H2.6	clu-1	DOWN	10.504	10.5125	9.74208	9.66506	-0.804646	0.572503
1099	WBGene00000585	C06G3.10	cogc-2	DOWN	9.66194	9.58998	8.79512	8.76311	-0.846845	0.555999
1100	WBGene00000596	C15A11.5	col-7	DOWN	12.5334	12.1924	9.63885	8.20001	-3.44348	0.0919197
1101	WBGene00000597	F11H8.3	col-8	DOWN	13.4805	13.4959	10.1603	9.79147	-3.51231	0.0876375
1102	WBGene00000608	ZK1193.1	col-19	DOWN	12.6632	12.2946	8.96889	8.99754	-3.49569	0.0886529
1103	WBGene00000609	F11G11.11	col-20	DOWN	14.9029	15.01	13.5642	13.195	-1.57686	0.33521
1104	WBGene00000615	F54C9.4	col-38	DOWN	11.1299	10.9028	9.70333	9.62456	-1.3524	0.391639
1105	WBGene00000617	T13B5.4	col-40	DOWN	7.31763	6.9341	5.46626	5.63554	-1.57497	0.335651
1106	WBGene00000646	H17B01.2	col-70	DOWN	10.663	10.5704	8.26089	8.46745	-2.25252	0.209857
1107	WBGene00000651	K03H9.2	col-75	DOWN	6.89388	6.7923	5.95966	5.88032	-0.923099	0.527375
1108	WBGene00000656	C09G5.5	col-80	DOWN	12.7756	12.3997	9.96953	8.08283	-3.56143	0.0847036
1109	WBGene00000675	K02D7.3	col-101	DOWN	12.3772	12.2724	7.93504	7.58069	-4.5669	0.0421917
1110	WBGene00000679	F58F6.2	col-105	DOWN	11.7604	11.5429	10.1943	9.75918	-1.67488	0.313191
1111	WBGene00000680	Y77E11A.15	col-106	DOWN	15.3724	15.6677	13.1085	13.3578	-2.2869	0.204915
1112	WBGene00000693	C53B4.5	col-119	DOWN	13.148	12.9438	9.88734	9.87605	-3.16417	0.111556
1113	WBGene00000696	T05A1.2	col-122	DOWN	15.8923	15.9215	14.673	14.2938	-1.42347	0.372815
1114	WBGene00000698	C24F3.6	col-124	DOWN	12.4405	12.0665	9.21842	8.3462	-3.47121	0.0901702
1115	WBGene00000711	C52D10.13	col-138	DOWN	12.3352	12.1862	9.15682	8.71078	-3.32688	0.0996573
1116	WBGene00000713	F26F12.1	col-140	DOWN	15.6519	15.4775	11.8833	11.4402	-3.90291	0.0668507
1117	WBGene00000714	T15B7.5	col-141	DOWN	7.67795	7.43042	5.68844	5.51442	-1.95276	0.258322
1118	WBGene00000716	T15B7.3	col-143	DOWN	14.0366	13.8787	10.3777	10.4216	-3.55805	0.0849022
1119	WBGene00000730	T11F9.9	col-157	DOWN	11.3894	11.1433	7.98462	7.88951	-3.32929	0.0994912
1120	WBGene00000731	D2023.7	col-158	DOWN	8.89817	8.97555	7.21747	7.42947	-1.61338	0.326831
1121	WBGene00000748	C35B8.1	col-175	DOWN	7.29276	7.09896	5.79224	5.74983	-1.42482	0.372465
1122	WBGene00000751	C34F6.2	col-178	DOWN	14.5617	14.3615	10.4717	10.5009	-3.97537	0.0635764
1123	WBGene00000752	C34F6.3	col-179	DOWN	12.5597	12.2827	8.09013	8.29231	-4.22998	0.0532905
1124	WBGene00000756	F02D10.1	col-183	DOWN	7.11861	7.6262	5.34779	5.38281	-2.00711	0.248772
1125	WBGene00000757	F15A2.1	col-184	DOWN	13.7547	13.5469	11.1563	11.3054	-2.41992	0.186867
1126	WBGene00000779	F28H1.2	cpn-3	DOWN	12.0295	12.1752	10.3777	9.83953	-1.99376	0.251083
1127	WBGene00000789	M04G12.2	cpz-2	DOWN	10.8754	11.0452	9.85351	9.98108	-1.043	0.485319
1128	WBGene00000822	F40E10.3	csq-1	DOWN	10.9849	11.0203	8.95544	8.76783	-2.14093	0.226733
1129	WBGene00000867	H31G24.4	cyb-2.2	DOWN	15.3842	15.5793	14.4087	14.4817	-1.03656	0.48749
1130	WBGene00000883	Y75B12B.2	cyn-7	DOWN	16.2272	16.3125	15.5007	15.5279	-0.755515	0.592335
1131	WBGene00000894	M110.5	dab-1	DOWN	9.88962	9.6875	8.76802	8.75547	-1.02682	0.490791
1132	WBGene00000933	C14A4.2	dap-3	DOWN	10.2701	10.3489	9.49189	9.46864	-0.829256	0.562819
1133	WBGene00000942	ZC477.9	deb-1	DOWN	7.97314	7.76216	6.29453	6.19569	-1.62254	0.324763
1134	WBGene00000966	F55A12.4	dhs-2	DOWN	9.62478	9.45473	6.70529	6.84469	-2.76477	0.147137
1135	WBGene00000967	T02E1.5	dhs-3	DOWN	9.49749	9.50718	7.13269	7.28297	-2.29451	0.203838
1136	WBGene00000971	E04F6.7	dhs-7	DOWN	7.14182	7.3478	5.69511	5.71947	-1.53752	0.344477
1137	WBGene00000983	F35B12.2	dhs-20	DOWN	11.1065	11.0051	8.11833	7.67795	-3.1577	0.112057
1138	WBGene00001021	C01G10.12	dnj-3	DOWN	12.5733	12.6178	11.8319	11.8949	-0.732161	0.602002
1139	WBGene00001028	F22B7.5	dnj-10	DOWN	10.0554	10.2237	9.16526	9.14785	-0.982998	0.505927
1140	WBGene00001044	Y39C12A.8	dnj-26	DOWN	12.4724	12.6778	11.2678	11.2624	-1.31	0.403321
1141	WBGene00001059	F44B9.1	dpf-6	DOWN	7.00137	6.96721	6.07046	5.98001	-0.959054	0.514394
1142	WBGene00001066	Y41E3.2	dpy-4	DOWN	7.67795	7.53613	6.67058	6.58537	-0.979065	0.507308
1143	WBGene00001092	F53A2.5	dro-1	DOWN	9.6607	9.70724	8.39799	8.5241	-1.22292	0.428413
1144	WBGene00001093	T12E12.4	drp-1	DOWN	9.6141	9.61864	8.71945	8.68257	-0.915364	0.53021
1145	WBGene00001095	F10C2.6	dars-2	DOWN	11.7026	11.7307	10.7561	10.8208	-0.928192	0.525517
1146	WBGene00001132	T11B7.4	alp-1	DOWN	7.45106	7.71174	6.14099	6.15566	-1.43308	0.37034
1147	WBGene00001244	F41H10.8	elo-6	DOWN	14.0329	13.8743	12.7521	12.9014	-1.12688	0.457904
1148	WBGene00001389	F15B9.3	far-5	DOWN	10.3503	10.5972	8.62216	8.93125	-1.69703	0.30842
1149	WBGene00001397	W06D12.3	fat-5	DOWN	13.4071	12.9002	11.182	11.3747	-1.87532	0.272567
1150	WBGene00001399	F10D2.9	fat-7	DOWN	9.63919	9.72498	7.03033	7.31763	-2.5081	0.175786
1151	WBGene00001401	H12I13.4	fbf-1	DOWN	11.4213	11.3719	10.6214	10.6418	-0.764958	0.58847
1152	WBGene00001402	F21H12.5	fbf-2	DOWN	11.2496	11.2475	10.5054	10.5039	-0.743882	0.59713
1153	WBGene00001455	C05E11.8	flp-12	DOWN	7.96238	7.84321	6.82573	6.76917	-1.10534	0.464791
1154	WBGene00001486	F59G1.7	frh-1	DOWN	13.1224	13.132	12.3497	12.4229	-0.740892	0.598369
1155	WBGene00001497	T08B2.9	fars-1	DOWN	10.8506	10.805	10.0925	10.0342	-0.764423	0.588689
1156	WBGene00001566	C28C12.9	acdh-13	DOWN	11.6634	11.7074	11.0495	11.0474	-0.636961	0.643066
1157	WBGene00001578	R12A1.4	ges-1	DOWN	10.1691	9.93363	8.46618	8.57058	-1.53298	0.345562
1158	WBGene00001609	F02A9.6	glp-1	DOWN	11.199	11.198	10.5328	10.4622	-0.70098	0.615154
1159	WBGene00001645	C03E10.4	gly-20	DOWN	12.2893	12.4181	11.121	11.2214	-1.18248	0.440594
1160	WBGene00001679	F13D12.7	gpb-1	DOWN	7.70311	7.65675	7.03033	6.98657	-0.671478	0.627863
1161	WBGene00001693	T01B10.1	grd-4	DOWN	6.58886	7.07262	5.02151	5.12842	-1.75577	0.296114
1162	WBGene00001713	F42C5.7	grl-4	DOWN	8.37885	8.32095	7.09771	6.81965	-1.39122	0.381243
1163	WBGene00001752	K08F4.7	gst-4	DOWN	11.2531	11.6011	9.75023	9.62756	-1.73821	0.299742
1164	WBGene00001754	F11G11.3	gst-6	DOWN	10.0889	10.19	8.05102	8.32547	-1.95123	0.258596
1165	WBGene00001758	Y45G12C.2	gst-10	DOWN	10.0769	10.6662	8.11452	8.17606	-2.22628	0.213709
1166	WBGene00001761	T26C5.1	gst-13	DOWN	10.6735	10.8788	9.44732	9.56094	-1.27201	0.414084
1167	WBGene00001774	Y53F4B.29	gst-26	DOWN	9.59889	9.78838	7.66919	8.04264	-1.83772	0.279764
1168	WBGene00001775	Y53F4B.30	gst-27	DOWN	12.3338	12.3011	10.5354	10.8122	-1.6436	0.320057
1169	WBGene00001777	Y53F4B.32	gst-29	DOWN	8.44046	8.52901	7.4417	7.37415	-1.07681	0.474075
1170	WBGene00001780	Y53F4B.37	gst-32	DOWN	7.79798	7.9445	6.77917	6.81965	-1.07183	0.475715
1171	WBGene00001819	ZK484.2	haf-9	DOWN	7.71849	7.84321	6.76761	6.81139	-0.991353	0.503006
1172	WBGene00001841	C36B7.7	hen-1	DOWN	7.74971	7.81206	6.45456	6.68639	-1.21041	0.432146
1173	WBGene00001867	T07G12.12	him-8	DOWN	13.217	13.1887	12.4663	12.5034	-0.717981	0.607948
1174	WBGene00001985	C18E3.8	hop-1	DOWN	12.9225	12.9696	12.2137	12.1993	-0.739533	0.598933
1175	WBGene00002102	T10D4.13	ins-19	DOWN	13.9399	13.9968	11.8954	11.8904	-2.07546	0.23726
1176	WBGene00002110	ZC334.11	ins-27	DOWN	10.7444	10.6735	7.98999	8.15298	-2.63747	0.16071
1177	WBGene00002133	W04D2.3	inx-11	DOWN	11.9677	12.0845	10.8548	11.0007	-1.09837	0.467043
1178	WBGene00002136	F07A5.1	inx-14	DOWN	14.4526	14.4857	13.5532	13.5772	-0.903974	0.534413
1179	WBGene00002148	F44C4.4	gon-14	DOWN	10.8606	10.9327	9.91672	9.97542	-0.950559	0.517432
1180	WBGene00002200	M176.7	kin-16	DOWN	7.82783	8.00803	6.63294	6.52196	-1.34048	0.39489
1181	WBGene00002214	M7.2	klc-1	DOWN	6.35516	6.38097	5.46626	5.54567	-0.862104	0.55015
1182	WBGene00002260	T22G5.6	lbp-8	DOWN	9.88707	10.2809	7.44809	8.13585	-2.29202	0.20419
1183	WBGene00002269	Y55B1AR.1	lec-6	DOWN	13.0886	13.2021	11.6423	11.3039	-1.67228	0.313758
1184	WBGene00002272	C16H3.2	lec-9	DOWN	13.0486	13.2478	10.7522	10.4719	-2.53615	0.172403
1185	WBGene00002274	F38A5.3	lec-11	DOWN	10.4352	10.516	9.56687	9.4867	-0.948823	0.518055
1186	WBGene00002879	C29E4.8	let-754	DOWN	13.3368	13.4684	12.3278	12.4391	-1.01914	0.493411
1187	WBGene00003090	Y22F5A.4	lys-1	DOWN	15.3444	15.6068	13.2463	13.0482	-2.32833	0.199114
1188	WBGene00003091	Y22F5A.5	lys-2	DOWN	13.5122	13.8584	8.64763	9.53516	-4.59392	0.0414088
1189	WBGene00003093	F58B3.1	lys-4	DOWN	14.349	13.824	12.247	12.1559	-1.88507	0.270731
1190	WBGene00003094	F58B3.2	lys-5	DOWN	13.3915	12.8282	11.3602	11.2003	-1.82956	0.28135
1191	WBGene00003095	F58B3.3	lys-6	DOWN	10.1854	9.58043	8.03028	7.97388	-1.88083	0.271527
1192	WBGene00003096	C02A12.4	lys-7	DOWN	17.5786	17.7111	15.4426	14.9462	-2.45049	0.182949
1193	WBGene00003097	C17G10.5	lys-8	DOWN	14.1982	14.0532	12.3912	12.1694	-1.8454	0.278278
1194	WBGene00003099	F17E9.11	lys-10	DOWN	9.96961	9.98603	7.34998	7.41061	-2.59752	0.165222
1195	WBGene00003165	T07H8.4	mec-1	DOWN	8.21234	7.94836	6.92221	6.69134	-1.27358	0.413633
1196	WBGene00003435	C33F10.9	msp-40	DOWN	8.18175	10.3927	6.83615	6.37054	-2.68388	0.155623
1197	WBGene00003473	K11G9.6	mtl-1	DOWN	14.9872	14.9596	13.5927	13.7921	-1.28096	0.411522
1198	WBGene00003485	W10G6.3	mua-6	DOWN	8.26791	8.27194	7.03033	6.84469	-1.33241	0.397104
1199	WBGene00003507	C14C11.6	mut-14	DOWN	13.0613	13.3075	11.9039	11.9244	-1.27026	0.414584
1200	WBGene00003522	K06A4.1	nas-3	DOWN	8.71541	8.88572	7.05355	7.50078	-1.5234	0.347865
1201	WBGene00003539	T11F9.3	nas-20	DOWN	11.5806	11.6019	10.5257	10.5447	-1.05602	0.480955
1202	WBGene00003540	T11F9.5	nas-21	DOWN	6.58886	6.53764	5.90135	5.92206	-0.651542	0.636599
1203	WBGene00003541	T11F9.6	nas-22	DOWN	7.3277	7.2461	6.30859	6.42328	-0.920962	0.528157
1204	WBGene00003612	Y5H2B.2	nhr-13	DOWN	12.2588	12.2546	11.6282	11.6089	-0.638185	0.642521
1205	WBGene00003656	T09A12.4	nhr-66	DOWN	11.5335	11.5069	10.7535	10.7729	-0.757	0.591725
1206	WBGene00003764	Y43F8C.2	nlp-26	DOWN	9.76623	10.1622	7.78414	8.07087	-2.03673	0.243715
1207	WBGene00003766	B0213.3	nlp-28	DOWN	12.4313	13.0172	10.9025	11.2022	-1.67187	0.313846
1208	WBGene00003786	VC5.3	npa-1	DOWN	13.7336	13.5683	12.4405	12.5623	-1.14951	0.450777
1209	WBGene00003912	C38D4.6	pal-1	DOWN	13.0686	13.2962	12.0865	12.0734	-1.10247	0.465717
1210	WBGene00003923	D1054.2	pas-2	DOWN	7.9364	7.84321	7.06182	7.10257	-0.80761	0.571328
1211	WBGene00003928	ZK945.2	pas-7	DOWN	13.9881	14.0587	13.0707	13.1579	-0.909081	0.532524
1212	WBGene00003934	F54C1.7	pat-10	DOWN	14.4311	14.8194	12.9775	12.7773	-1.74786	0.297743
1213	WBGene00003956	ZK112.1	pcp-1	DOWN	12.9148	13.2293	11.1418	11.4395	-1.78134	0.290914
1214	WBGene00003957	F23B2.12	pcp-2	DOWN	9.88837	10.249	8.2323	8.20577	-1.84967	0.277456
1215	WBGene00003960	F54D5.1	pcs-1	DOWN	10.7379	10.9151	9.72478	9.57142	-1.17836	0.441853
1216	WBGene00003993	B0523.3	pgl-2	DOWN	12.4554	12.6294	11.3746	11.3454	-1.18236	0.440629
1217	WBGene00004020	EGAP2.3	pho-1	DOWN	9.44915	9.60581	7.90601	7.58069	-1.78413	0.290351
1218	WBGene00004026	T20B3.7	phy-3	DOWN	6.7191	6.69134	5.94571	5.92206	-0.771334	0.585875
1219	WBGene00004044	F55G1.8	plk-3	DOWN	14.9987	15.0284	14.2299	14.2474	-0.774885	0.584435
1220	WBGene00004061	T02D1.5	pmp-4	DOWN	8.02092	8.00319	6.82573	6.88165	-1.15837	0.44802
1221	WBGene00004062	T10H9.5	pmp-5	DOWN	8.22321	8.15421	6.76442	6.70196	-1.45552	0.364624
1222	WBGene00004092	F44C4.5	ppt-1	DOWN	8.66079	8.91452	7.27311	7.31763	-1.49229	0.355449
1223	WBGene00004112	C46G7.4	pqn-22	DOWN	8.79928	8.9238	7.29663	7.38918	-1.51864	0.349016
1224	WBGene00004190	T27F6.5	pars-2	DOWN	11.7533	11.6523	10.872	10.8115	-0.861012	0.550566
1225	WBGene00004244	C30G12.7	puf-8	DOWN	6.88165	7.07262	5.92206	5.94571	-1.04325	0.485234
1226	WBGene00004269	F59B2.7	rab-6.1	DOWN	12.2208	12.3462	11.3817	11.3896	-0.897871	0.536678
1227	WBGene00004282	Y45F3A.2	rab-30	DOWN	8.34871	8.48119	7.48669	7.5292	-0.907005	0.533291
1228	WBGene00004342	C30A5.2	rfs-1	DOWN	9.57378	9.50322	8.37187	8.28861	-1.20826	0.43279
1229	WBGene00004394	Y57A10A.11	rol-1	DOWN	10.017	9.59345	7.80432	7.14419	-2.33099	0.198748
1230	WBGene00004443	B0513.3	rpl-29	DOWN	13.3989	13.2506	12.0504	12.0899	-1.25462	0.419105
1231	WBGene00004486	T08B2.10	rps-17	DOWN	16.5985	16.648	15.9398	15.9748	-0.665969	0.630265
1232	WBGene00004721	ZC328.4	san-1	DOWN	11.8933	12.116	10.8372	10.8239	-1.17407	0.443171
1233	WBGene00004762	F35G12.3	sel-5	DOWN	10.1325	10.091	9.42127	9.45843	-0.671894	0.627682
1234	WBGene00004823	C06A8.4	skr-17	DOWN	12.5666	12.5012	11.814	11.8025	-0.725637	0.60473
1235	WBGene00004875	F47G4.7	smd-1	DOWN	8.24846	8.12455	6.52196	6.52196	-1.66454	0.315444
1236	WBGene00004932	C08A9.1	sod-3	DOWN	9.98216	9.84431	8.6317	8.67434	-1.26021	0.417483
1237	WBGene00004975	ZC404.3	spe-39	DOWN	9.98894	10.1389	9.02201	8.91048	-1.09768	0.467266
1238	WBGene00004985	T05E11.4	spo-11	DOWN	13.0961	13.2197	11.9133	11.829	-1.28675	0.409874
1239	WBGene00004986	T07C4.4	spp-1	DOWN	14.6215	14.4874	12.5538	12.8045	-1.87529	0.272571
1240	WBGene00004987	T08A9.12	spp-2	DOWN	12.5467	12.3444	10.4166	10.8078	-1.83334	0.280615
1241	WBGene00004988	T08A9.7	spp-3	DOWN	14.5112	14.4173	13.334	13.4774	-1.05857	0.480108
1242	WBGene00004989	T08A9.8	spp-4	DOWN	11.7947	11.8968	9.65958	9.60466	-2.21363	0.21559
1243	WBGene00004990	T08A9.9	spp-5	DOWN	16.3444	16.5448	15.1492	15.2759	-1.23209	0.425702
1244	WBGene00004997	T22G5.7	spp-12	DOWN	10.3154	9.5572	7.49083	7.685	-2.34839	0.196366
1245	WBGene00004999	K09F5.3	spp-14	DOWN	15.611	15.6415	13.9513	13.7931	-1.75407	0.296464
1246	WBGene00005001	F32D8.9	spp-16	DOWN	11.9999	11.9114	10.6942	10.8517	-1.18272	0.440519
1247	WBGene00005002	C54G6.5	spp-17	DOWN	12.4447	12.5299	10.2854	10.0396	-2.32479	0.199603
1248	WBGene00005022	F29F11.1	sqv-4	DOWN	15.4342	15.6519	14.3644	14.3725	-1.17453	0.443028
1249	WBGene00005191	Y51A2D.12	srg-34	DOWN	8.99508	8.86185	7.83144	7.97889	-1.0233	0.49199
1250	WBGene00005271	C06C3.6	srh-48	DOWN	6.52017	6.56848	5.74662	5.7827	-0.779668	0.582501
1251	WBGene00005421	D1065.5	srh-211	DOWN	7.57225	7.57797	6.2716	6.21255	-1.33303	0.396933
1252	WBGene00005444	T05E12.7	srh-237	DOWN	7.54083	7.33339	5.74662	5.71947	-1.70407	0.30692
1253	WBGene00005446	T26H5.3	srh-239	DOWN	6.29022	6.33625	5.52439	5.54567	-0.778207	0.583091
1254	WBGene00005642	C05E4.3	srp-1	DOWN	10.1318	10.4558	8.93715	8.85497	-1.39774	0.379524
1255	WBGene00005871	C44C3.1	srw-124	DOWN	6.63933	6.57564	5.67791	5.79069	-0.873188	0.545939
1256	WBGene00006006	B0507.11	srx-115	DOWN	8.06624	8.00803	6.85546	6.77917	-1.21982	0.429337
1257	WBGene00006311	F57B1.2	sun-1	DOWN	12.7216	12.7226	12.1127	12.1208	-0.60532	0.657326
1258	WBGene00006394	K10D3.3	taf-11.2	DOWN	12.3669	12.4085	10.9849	11.1282	-1.33115	0.397452
1259	WBGene00006408	T14G12.3	tag-18	DOWN	11.3547	11.6666	9.35395	8.47078	-2.59826	0.165138
1260	WBGene00006411	F14D12.6	octr-1	DOWN	9.53218	9.62756	8.74715	8.75212	-0.830237	0.562437
1261	WBGene00006452	R148.6	heh-1	DOWN	13.8582	14.2111	12.2654	12.3454	-1.72921	0.301616
1262	WBGene00006510	C01G6.6	mtrr-1	DOWN	9.95252	9.9409	9.28107	9.30297	-0.654688	0.635213
1263	WBGene00006551	ZK380.1	tbx-32	DOWN	7.10407	6.99993	6.12034	6.14099	-0.921334	0.528021
1264	WBGene00006555	ZK829.5	tbx-36	DOWN	11.1791	11.291	9.9269	10.0769	-1.23317	0.425382
1265	WBGene00006562	K01C8.3	tdc-1	DOWN	13.5268	13.4725	12.648	12.7239	-0.813692	0.568924
1266	WBGene00006572	C06G3.11	tin-9.1	DOWN	14.0461	14.0355	13.1825	13.2763	-0.811415	0.569823
1267	WBGene00006587	F53A9.10	tnt-2	DOWN	8.78949	9.09071	7.26638	6.19569	-2.20907	0.216274
1268	WBGene00006609	W05E10.4	tre-3	DOWN	7.91727	8.00803	6.47669	6.47291	-1.48785	0.356543
1269	WBGene00006610	F15A2.2	tre-4	DOWN	7.40429	7.38285	6.60558	6.67058	-0.755489	0.592346
1270	WBGene00006621	C43G2.5	try-3	DOWN	8.62949	8.54497	7.21523	7.38285	-1.28819	0.409465
1271	WBGene00006636	T14B4.4	tsp-10	DOWN	8.81496	8.94003	6.70529	7.10815	-1.97078	0.255116
1272	WBGene00006692	W06D12.2	twk-42	DOWN	8.04264	8.17641	7.10139	7.08961	-1.01403	0.495162
1273	WBGene00006719	F49E12.4	ubc-24	DOWN	7.66828	7.84799	6.48058	6.69134	-1.17217	0.443752
1274	WBGene00006764	ZK721.2	unc-27	DOWN	13.0759	13.0801	10.9178	10.5555	-2.34131	0.197331
1275	WBGene00006819	F08B6.4	unc-87	DOWN	10.5917	10.8784	9.45174	9.21404	-1.40218	0.378357
1276	WBGene00006889	T06G6.9	pfd-3	DOWN	10.7752	10.7763	10.0817	10.1091	-0.680333	0.624021
1277	WBGene00006895	T17A3.8	ver-2	DOWN	9.17749	9.05612	7.55241	7.75642	-1.46239	0.362891
1278	WBGene00006916	C26H9A.1	vha-7	DOWN	12.7364	12.6965	11.8018	11.7924	-0.919331	0.528754
1279	WBGene00006925	K09F5.2	vit-1	DOWN	11.9108	12.5218	10.0838	9.17821	-2.58529	0.166628
1280	WBGene00006935	ZC513.4	vars-1	DOWN	11.0215	11.1392	10.1352	10.1354	-0.945037	0.519416
1281	WBGene00006949	F38E11.7	wrt-3	DOWN	8.09013	8.27942	6.82573	6.97857	-1.28263	0.411047
1282	WBGene00007001	C43E11.4	tufm-2	DOWN	9.45744	9.3996	8.43269	8.51724	-0.953557	0.516358
1283	WBGene00007065	3R5.1	pot-3	DOWN	11.1164	11.1311	10.4081	10.3625	-0.738446	0.599385
1284	WBGene00007071	AC3.5	AC3.5	DOWN	9.29075	9.39001	7.22242	7.43973	-2.0093	0.248393
1285	WBGene00007101	B0024.11	B0024.11	DOWN	12.1436	12.2141	11.2901	11.2826	-0.892514	0.538675
1286	WBGene00007102	B0024.13	B0024.13	DOWN	13.5191	13.5974	12.731	12.7914	-0.797033	0.575532
1287	WBGene00007112	B0035.13	B0035.13	DOWN	13.6134	13.7677	11.4715	12.0834	-1.91308	0.265524
1288	WBGene00007153	B0365.6	clec-41	DOWN	10.8551	10.1248	8.27448	8.64742	-2.02902	0.245021
1289	WBGene00007155	B0379.1	B0379.1	DOWN	9.64217	9.68107	8.71335	8.59046	-1.00971	0.496645
1290	WBGene00007283	C03E10.6	clec-222	DOWN	12.029	12.0603	10.3764	10.3223	-1.69526	0.308799
1291	WBGene00007304	C04G2.1	ttr-39	DOWN	8.79038	8.75129	8.14669	8.14728	-0.623846	0.648938
1292	WBGene00007331	C05C10.4	pho-11	DOWN	9.86262	10.3069	6.88165	7.52731	-2.88031	0.135813
1293	WBGene00007334	C05C10.7	C05C10.7	DOWN	12.2751	12.2047	11.5439	11.5366	-0.699607	0.61574
1294	WBGene00007336	C05C12.4	C05C12.4	DOWN	9.87652	9.86272	8.30082	8.35887	-1.53978	0.343938
1295	WBGene00007338	C05C12.6	C05C12.6	DOWN	8.29118	8.35027	7.41378	7.49716	-0.865261	0.548947
1296	WBGene00007362	C06B3.3	cyp-35C1	DOWN	13.2668	13.785	10.9032	11.7924	-2.17812	0.220964
1297	WBGene00007384	C06G8.1	swt-3	DOWN	10.3997	10.5768	8.58348	8.90341	-1.7448	0.298374
1298	WBGene00007404	C07A9.8	best-5	DOWN	8.09475	8.15421	7.03033	6.9341	-1.14227	0.453047
1299	WBGene00007431	C08B6.11	C08B6.11	DOWN	8.34112	8.40446	7.07767	7.30356	-1.18217	0.440687
1300	WBGene00007440	C08E8.4	C08E8.4	DOWN	9.29674	9.19659	8.00946	8.09013	-1.19687	0.436222
1301	WBGene00007452	C08F11.3	C08F11.3	DOWN	7.56462	7.38485	5.84346	5.99408	-1.55596	0.340101
1302	WBGene00007466	C08H9.6	chil-2	DOWN	8.18604	8.28407	6.92221	7.11984	-1.21403	0.431062
1303	WBGene00007476	C09E9.1	C09E9.1	DOWN	12.4204	12.4822	11.6789	11.6766	-0.773547	0.584977
1304	WBGene00007478	C09F9.1	C09F9.1	DOWN	9.19659	9.17887	7.46037	7.38918	-1.76296	0.294643
1305	WBGene00007515	C10C6.7	C10C6.7	DOWN	9.6876	9.58172	8.36499	8.31304	-1.29565	0.407353
1306	WBGene00007516	C11E4.1	gpx-5	DOWN	9.50938	9.38024	8.02331	8.00665	-1.42983	0.371174
1307	WBGene00007557	C14A4.6	C14A4.6	DOWN	10.5868	10.552	9.70955	9.76108	-0.834072	0.560944
1308	WBGene00007558	C14A4.7	C14A4.7	DOWN	9.00217	8.90445	7.3945	7.43973	-1.53619	0.344794
1309	WBGene00007565	C14A6.1	clec-48	DOWN	11.0642	10.9755	9.23863	9.61864	-1.59122	0.331891
1310	WBGene00007585	C14C10.2	C14C10.2	DOWN	10.5438	10.6134	9.68279	9.70965	-0.882345	0.542485
1311	WBGene00007598	C15A11.4	C15A11.4	DOWN	9.20786	9.35003	7.69786	8.07232	-1.39386	0.380546
1312	WBGene00007606	C15C8.4	C15C8.4	DOWN	9.99265	10.2003	9.04361	9.07355	-1.03789	0.487039
1313	WBGene00007615	C15H11.5	set-31	DOWN	11.3621	11.473	10.2335	10.1487	-1.2264	0.427384
1314	WBGene00007643	C17E4.3	marc-3	DOWN	12.0902	12.2323	11.0668	11.1097	-1.07299	0.475332
1315	WBGene00007691	C23H4.2	C23H4.2	DOWN	7.46741	7.4552	5.9972	6.07865	-1.42337	0.37284
1316	WBGene00007692	C23H4.3	C23H4.3	DOWN	8.4342	8.41437	6.17581	6.30372	-2.18452	0.219985
1317	WBGene00007695	C23H4.7	C23H4.7	DOWN	7.07451	7.14051	5.9972	6.09939	-1.05921	0.479893
1318	WBGene00007697	C24F3.2	C24F3.2	DOWN	12.7938	12.8305	11.9008	11.9423	-0.890642	0.539374
1319	WBGene00007702	C24H11.5	C24H11.5	DOWN	11.3365	11.3843	10.587	10.6147	-0.759542	0.590684
1320	WBGene00007711	C25A1.12	lid-1	DOWN	10.4975	10.6301	9.40533	9.55925	-1.0815	0.472538
1321	WBGene00007724	C25F9.4	C25F9.4	DOWN	7.53613	7.83853	6.35294	6.45456	-1.28358	0.410776
1322	WBGene00007731	C25G4.3	C25G4.3	DOWN	11.8743	11.913	11.2123	11.2607	-0.657135	0.634137
1323	WBGene00007743	C26C6.9	C26C6.9	DOWN	10.0889	10.154	8.67823	9.01922	-1.27271	0.413882
1324	WBGene00007744	C26D10.3	C26D10.3	DOWN	9.11137	9.15682	8.4925	8.46465	-0.65552	0.634847
1325	WBGene00007796	C28D4.10	C28D4.10	DOWN	6.82109	6.88622	5.90135	5.94571	-0.930132	0.52481
1326	WBGene00007833	C31A11.5	oac-6	DOWN	7.685	7.69103	6.75976	6.7923	-0.911991	0.531451
1327	WBGene00007864	C32H11.1	C32H11.1	DOWN	11.0706	11.1063	7.70916	8.13585	-3.16595	0.111418
1328	WBGene00007866	C32H11.3	C32H11.3	DOWN	10.816	11.0454	7.36843	7.98502	-3.25399	0.104822
1329	WBGene00007867	C32H11.4	C32H11.4	DOWN	11.6265	11.8311	7.685	8.37375	-3.69942	0.0769773
1330	WBGene00007875	C32H11.12	dod-24	DOWN	13.2889	12.3774	10.0987	9.57834	-2.99463	0.125466
1331	WBGene00007885	C33A12.6	ugt-21	DOWN	7.78301	8.07087	6.2716	6.55314	-1.51457	0.350002
1332	WBGene00007963	C36A4.1	cyp-25A1	DOWN	12.2108	12.2334	10.5774	10.5961	-1.63536	0.321891
1333	WBGene00007964	C36A4.2	cyp-25A2	DOWN	12.0054	12.0434	10.8082	10.8323	-1.20416	0.434023
1334	WBGene00007965	C36A4.4	C36A4.4	DOWN	10.6187	10.6336	9.68279	9.68719	-0.941173	0.520809
1335	WBGene00007985	C36F7.2	swah-1	DOWN	12.3899	12.3702	11.3725	11.3735	-1.00705	0.497563
1336	WBGene00008048	C40H5.6	hpo-41	DOWN	10.9838	11.1597	10.0881	10.0788	-0.988298	0.504072
1337	WBGene00008050	C41C4.1	C41C4.1	DOWN	7.99468	8.00803	7.08835	7.11456	-0.899901	0.535924
1338	WBGene00008062	C41G7.4	set-32	DOWN	12.6737	12.7662	11.6979	11.7133	-1.01435	0.49505
1339	WBGene00008123	C47A4.2	ent-6	DOWN	10.1878	10.3352	8.92729	9.12076	-1.23746	0.424119
1340	WBGene00008167	C48B4.1	C48B4.1	DOWN	9.95398	10.001	8.22438	8.32121	-1.70471	0.306783
1341	WBGene00008172	C48B4.9	C48B4.9	DOWN	12.218	12.2718	11.2967	11.3597	-0.916669	0.529731
1342	WBGene00008173	C48B4.10	C48B4.10	DOWN	11.5856	11.6329	10.3657	10.2849	-1.28393	0.410675
1343	WBGene00008193	C49C3.3	C49C3.3	DOWN	8.90376	8.85901	7.94011	7.78414	-1.01926	0.493369
1344	WBGene00008207	C49F5.3	C49F5.3	DOWN	12.7944	12.7609	11.9391	11.9729	-0.821633	0.565801
1345	WBGene00008220	C50B6.7	C50B6.7	DOWN	11.8141	11.9721	9.22537	9.674	-2.44343	0.183846
1346	WBGene00008232	C50F4.4	C50F4.4	DOWN	11.9357	11.9793	10.6589	10.8596	-1.19828	0.435795
1347	WBGene00008275	C53B4.6	nstp-1	DOWN	12.0664	12.0881	11.3972	11.3929	-0.68221	0.62321
1348	WBGene00008284	C53D6.7	C53D6.7	DOWN	9.01337	9.18736	7.8931	8.06423	-1.1217	0.459552
1349	WBGene00008296	C54D10.1	cdr-2	DOWN	11.6466	11.7861	9.51547	9.50743	-2.2049	0.2169
1350	WBGene00008332	C55A6.3	C55A6.3	DOWN	8.52509	8.7871	7.50875	7.46037	-1.17154	0.443948
1351	WBGene00008333	C55A6.4	C55A6.4	DOWN	7.74971	8.06019	5.81808	5.74983	-2.121	0.229888
1352	WBGene00008336	C55A6.7	C55A6.7	DOWN	8.73672	8.92953	7.29663	7.64062	-1.3645	0.388369
1353	WBGene00008340	C55A6.11	C55A6.11	DOWN	7.20545	7.22717	5.71947	5.91339	-1.39988	0.37896
1354	WBGene00008341	C56A3.2	ttr-44	DOWN	10.9908	10.9226	8.31304	8.23146	-2.68443	0.155563
1355	WBGene00008352	cTel54X.1	fbxa-6	DOWN	8.2347	8.20577	6.70529	6.84469	-1.44524	0.36723
1356	WBGene00008354	D1025.2	gcsh-1	DOWN	8.47485	8.55314	6.35939	6.73599	-1.96631	0.255907
1357	WBGene00008364	D1046.3	D1046.3	DOWN	11.6313	11.6593	11.0166	11.0388	-0.617577	0.651764
1358	WBGene00008388	D1086.1	D1086.1	DOWN	11.7346	12.0064	10.5578	10.549	-1.31712	0.401335
1359	WBGene00008390	D1086.3	D1086.3	DOWN	9.46325	10.2918	6.99274	6.85693	-2.95271	0.129165
1360	WBGene00008395	D1086.8	D1086.8	DOWN	9.33328	9.17887	8.13069	8.19042	-1.09552	0.467968
1361	WBGene00008415	D2030.5	mce-1	DOWN	10.7003	10.4779	9.25207	9.3079	-1.3091	0.403572
1362	WBGene00008417	D2030.7	D2030.7	DOWN	13.1822	13.2896	12.1164	12.1549	-1.10027	0.46643
1363	WBGene00008464	E02H4.6	E02H4.6	DOWN	11.6372	11.6812	10.2511	10.4105	-1.32837	0.398218
1364	WBGene00008485	F01D4.1	ugt-43	DOWN	9.73873	9.79207	7.05233	7.86346	-2.3075	0.20201
1365	WBGene00008486	F01D4.2	ugt-44	DOWN	11.2506	11.1948	8.94191	9.23994	-2.13179	0.228174
1366	WBGene00008488	F01D4.5	F01D4.5	DOWN	12.459	12.611	11.489	11.5275	-1.02677	0.490809
1367	WBGene00008492	F01D5.1	F01D5.1	DOWN	9.99725	9.6875	6.88165	6.4967	-3.1532	0.112407
1368	WBGene00008493	F01D5.2	F01D5.2	DOWN	9.43595	9.81925	5.67791	6.19569	-3.69081	0.0774385
1369	WBGene00008494	F01D5.3	F01D5.3	DOWN	10.5228	10.874	5.94571	6.62038	-4.41537	0.0468644
1370	WBGene00008536	F02H6.3	F02H6.3	DOWN	10.3898	10.5199	9.02441	9.04746	-1.41895	0.373985
1371	WBGene00008542	F07A5.3	scav-6	DOWN	9.86459	9.77515	8.32997	8.5088	-1.40048	0.378803
1372	WBGene00008565	F08A8.2	F08A8.2	DOWN	7.9053	7.86346	6.53764	6.25275	-1.48919	0.356212
1373	WBGene00008566	F08A8.3	F08A8.3	DOWN	10.6268	10.6321	8.39555	8.57058	-2.14639	0.225877
1374	WBGene00008584	F08G5.6	F08G5.6	DOWN	11.7959	13.1337	8.95817	8.77489	-3.59824	0.0825701
1375	WBGene00008593	F08H9.5	clec-227	DOWN	8.18604	7.9445	5.81808	6.2716	-2.02043	0.246486
1376	WBGene00008594	F08H9.6	clec-57	DOWN	10.178	10.1262	8.29719	8.7169	-1.64505	0.319735
1377	WBGene00008597	F08H9.9	clec-55	DOWN	8.14099	8.19042	7.12889	7.16219	-1.02016	0.49306
1378	WBGene00008607	F09B12.3	F09B12.3	DOWN	10.4824	10.4367	8.92895	8.68257	-1.6538	0.317802
1379	WBGene00008621	F09C8.1	F09C8.1	DOWN	10.29	10.1616	9.09198	9.11499	-1.12232	0.459355
1380	WBGene00008629	F09F3.9	cpt-5	DOWN	9.28413	9.57378	7.16333	7.26505	-2.21476	0.215422
1381	WBGene00008741	F13D12.6	F13D12.6	DOWN	12.2042	12.3334	10.4425	9.12581	-2.48466	0.178666
1382	WBGene00008769	F13G3.11	mrpl-13	DOWN	6.62038	6.53579	5.81808	5.80522	-0.766436	0.587868
1383	WBGene00008775	F13H10.4	F13H10.4	DOWN	8.48697	8.42374	7.62517	7.58912	-0.848211	0.555473
1384	WBGene00008799	F14E5.1	F14E5.1	DOWN	7.87267	8.12455	6.53764	6.73599	-1.3618	0.389097
1385	WBGene00008804	F14E5.6	acp-4	DOWN	7.15319	6.7158	5.34779	5.417	-1.5521	0.341012
1386	WBGene00008809	F14F7.2	cyp-13A11	DOWN	8.19903	8.015	7.09771	7.12497	-0.995674	0.501501
1387	WBGene00008829	F14H3.10	cyp-35D1	DOWN	8.55314	8.9503	6.9095	7.38285	-1.60554	0.328612
1388	WBGene00008850	F15B9.6	F15B9.6	DOWN	9.6617	9.99082	7.18813	7.46037	-2.50201	0.17653
1389	WBGene00008868	F15G9.5	F15G9.5	DOWN	7.11861	7.1788	6.37054	6.33094	-0.797962	0.575161
1390	WBGene00008919	F17C11.8	vps-36	DOWN	6.70529	6.64746	5.79224	5.80522	-0.877646	0.544255
1391	WBGene00008936	F18E2.1	F18E2.1	DOWN	13.0722	13.1312	11.7548	11.9587	-1.24493	0.421927
1392	WBGene00008953	F19C6.4	F19C6.4	DOWN	7.73291	8.11965	6.35294	6.58537	-1.45712	0.364219
1393	WBGene00008968	F20C5.3	F20C5.3	DOWN	11.3719	11.4952	9.77185	10.0191	-1.53809	0.34434
1394	WBGene00009007	F21D5.2	otub-3	DOWN	12.0396	12.1364	10.8015	10.8438	-1.2654	0.415985
1395	WBGene00009009	F21D5.4	F21D5.4	DOWN	11.099	11.1828	10.0117	10.0566	-1.10676	0.464335
1396	WBGene00009086	F23D12.2	F23D12.2	DOWN	9.97869	9.92542	8.57111	8.76783	-1.28259	0.411058
1397	WBGene00009120	F25H2.6	F25H2.6	DOWN	13.627	13.6026	12.8954	12.9563	-0.688971	0.620296
1398	WBGene00009124	F25H2.13	rtel-1	DOWN	12.0958	12.0483	11.2781	11.3408	-0.76259	0.589437
1399	WBGene00009131	F25H8.1	F25H8.1	DOWN	12.5529	12.6262	11.2545	11.27	-1.32731	0.39851
1400	WBGene00009146	F26C11.1	F26C11.1	DOWN	7.62746	7.64331	6.15566	6.50611	-1.3045	0.404861
1401	WBGene00009192	F27E5.1	F27E5.1	DOWN	11.1074	11.1303	10.4632	10.4946	-0.639875	0.641769
1402	WBGene00009203	F28C6.2	aptf-3	DOWN	11.3142	11.3124	10.6898	10.6638	-0.636478	0.643282
1403	WBGene00009211	F28D1.1	wdr-46	DOWN	9.18194	9.24808	8.22438	8.19398	-1.00583	0.497984
1404	WBGene00009213	F28D1.3	thn-1	DOWN	14.4684	13.9143	12.398	12.2704	-1.85718	0.276016
1405	WBGene00009214	F28D1.4	thn-3	DOWN	9.29855	8.9503	7.16813	7.10257	-1.98908	0.2519
1406	WBGene00009215	F28D1.5	thn-2	DOWN	16.338	15.8736	14.1711	14.1209	-1.95983	0.257058
1407	WBGene00009237	F28H7.3	F28H7.3	DOWN	10.8209	11.0216	8.87381	9.09198	-1.93837	0.260911
1408	WBGene00009238	F28H7.4	F28H7.4	DOWN	7.97314	7.98462	6.2716	6.68639	-1.49988	0.353582
1409	WBGene00009256	F29F11.3	tut-2	DOWN	13.1459	13.0575	12.2574	12.2364	-0.854786	0.552948
1410	WBGene00009276	F30F8.9	F30F8.9	DOWN	10.5627	10.6358	9.3996	9.43619	-1.18138	0.440931
1411	WBGene00009329	F32D8.4	F32D8.4	DOWN	8.47892	8.50987	7.03033	7.25561	-1.35142	0.391905
1412	WBGene00009330	F32D8.5	F32D8.5	DOWN	13.0302	13.0787	12.2202	12.2087	-0.839942	0.558666
1413	WBGene00009336	F32D8.14	F32D8.14	DOWN	13.4925	13.5353	12.6812	12.6929	-0.826809	0.563775
1414	WBGene00009340	F32G8.4	best-14	DOWN	9.33328	9.81161	7.82597	8.09013	-1.61439	0.326603
1415	WBGene00009396	F35C5.8	clec-65	DOWN	14.6263	14.6067	13.6647	13.6863	-0.940966	0.520884
1416	WBGene00009422	F35E8.9	F35E8.9	DOWN	6.49468	6.55314	5.69511	5.71947	-0.816621	0.56777
1417	WBGene00009425	F35E12.1	scl-16	DOWN	7.94374	7.76216	6.23906	6.35084	-1.558	0.339621
1418	WBGene00009427	F35E12.3	fbxa-181	DOWN	9.35768	9.42379	7.83853	7.95372	-1.49462	0.354875
1419	WBGene00009430	F35E12.6	F35E12.6	DOWN	14.1832	14.4254	12.9241	13.1198	-1.28238	0.411118
1420	WBGene00009431	F35E12.7	dct-17	DOWN	10.7423	10.5721	9.0304	8.88607	-1.69894	0.308012
1421	WBGene00009439	F35G12.1	mlcd-1	DOWN	10.8209	10.9248	9.87536	9.68016	-1.09511	0.468099
1422	WBGene00009486	F36G9.7	F36G9.7	DOWN	8.32095	8.54497	6.15566	6.09939	-2.30543	0.2023
1423	WBGene00009514	F37H8.5	F37H8.5	DOWN	12.9142	12.8911	10.477	10.4267	-2.45081	0.182908
1424	WBGene00009518	F38A1.5	clec-166	DOWN	9.26994	9.32488	7.49474	7.75642	-1.67183	0.313855
1425	WBGene00009522	F38A1.9	F38A1.9	DOWN	6.52017	6.46427	5.8526	5.8526	-0.639617	0.641883
1426	WBGene00009526	F38A1.14	clec-169	DOWN	8.98433	7.87724	5.79224	6.12034	-2.4745	0.179929
1427	WBGene00009535	F38C2.1	F38C2.1	DOWN	8.75129	8.9238	7.77849	7.87107	-1.01276	0.495596
1428	WBGene00009554	F39B2.3	F39B2.3	DOWN	9.51559	9.71177	8.50908	8.47642	-1.12093	0.459798
1429	WBGene00009559	F39B2.11	mtx-1	DOWN	11.2461	11.2835	10.2766	10.4029	-0.925031	0.526669
1430	WBGene00009573	F40E10.5	F40E10.5	DOWN	8.79416	8.64375	6.83241	7.20429	-1.70061	0.307657
1431	WBGene00009626	F42A8.1	F42A8.1	DOWN	10.7452	11.0387	8.94191	8.48142	-2.18027	0.220635
1432	WBGene00009638	F42F12.7	nspc-14	DOWN	11.8299	11.865	11.2563	11.2722	-0.58321	0.667477
1433	WBGene00009643	F42G4.6	F42G4.6	DOWN	8.92037	9.02686	7.7389	7.8219	-1.19322	0.437327
1434	WBGene00009645	F42G10.1	F42G10.1	DOWN	7.16684	7.38285	6.0305	6.19569	-1.16175	0.446969
1435	WBGene00009686	F44D12.9	ent-4	DOWN	9.83953	9.92119	8.76519	8.8074	-1.09406	0.46844
1436	WBGene00009705	F44F4.10	F44F4.10	DOWN	8.41806	8.37375	7.63519	7.58069	-0.787962	0.579162
1437	WBGene00009706	F44G3.2	F44G3.2	DOWN	8.00731	8.62267	6.62038	6.72072	-1.64444	0.31987
1438	WBGene00009713	F44G4.3	F44G4.3	DOWN	12.6139	12.6022	11.662	11.6769	-0.9386	0.521739
1439	WBGene00009754	F46A9.1	F46A9.1	DOWN	7.42005	7.56462	6.49468	6.37672	-1.05663	0.480752
1440	WBGene00009773	F46B6.8	lipl-2	DOWN	13.2541	13.4132	10.3192	11.3082	-2.52	0.174343
1441	WBGene00009796	F46G10.1	F46G10.1	DOWN	9.49139	9.44237	7.7237	7.86346	-1.67329	0.313537
1442	WBGene00009877	F49C12.7	F49C12.7	DOWN	10.3245	10.3681	8.74	8.69325	-1.62967	0.323162
1443	WBGene00009883	F49C12.14	F49C12.14	DOWN	11.5127	11.6072	9.25531	9.30015	-2.28225	0.205577
1444	WBGene00009913	F49H6.12	F49H6.12	DOWN	6.69134	6.59441	5.52439	5.53413	-1.11361	0.462135
1445	WBGene00009919	F52A8.6	F52A8.6	DOWN	13.1867	13.1623	12.4523	12.4197	-0.738532	0.599349
1446	WBGene00010015	F54B3.3	atad-3	DOWN	8.13267	8.12455	7.36843	7.38285	-0.752972	0.59338
1447	WBGene00010042	F54C9.6	bcs-1	DOWN	9.57797	9.79911	8.16369	8.28407	-1.46466	0.36232
1448	WBGene00010049	F54D5.3	F54D5.3	DOWN	16.1891	16.3553	14.7016	14.7557	-1.54353	0.343046
1449	WBGene00010050	F54D5.4	F54D5.4	DOWN	12.982	13.4621	11.1083	11.0703	-2.13276	0.228021
1450	WBGene00010062	F54F3.3	lipl-1	DOWN	11.5892	11.5749	10.0097	10.4176	-1.36838	0.387327
1451	WBGene00010064	F54F7.2	F54F7.2	DOWN	11.5487	11.61	9.83953	9.98424	-1.66746	0.314808
1452	WBGene00010085	F55B11.3	F55B11.3	DOWN	14.3539	14.4185	13.2332	13.2095	-1.16485	0.446011
1453	WBGene00010116	F55F3.2	F55F3.2	DOWN	7.05233	7.09485	6.20979	6.23636	-0.850517	0.554586
1454	WBGene00010123	F55G11.2	F55G11.2	DOWN	9.28266	9.9655	6.2716	5.51442	-3.73107	0.0753072
1455	WBGene00010124	F55G11.4	F55G11.4	DOWN	15.6172	15.102	12.278	11.3076	-3.5668	0.0843893
1456	WBGene00010125	F55G11.5	dod-22	DOWN	9.91372	10.686	7.4815	7.05355	-3.03232	0.122231
1457	WBGene00010128	F55G11.8	F55G11.8	DOWN	8.82299	9.50911	6.08914	6.14099	-3.05099	0.12066
1458	WBGene00010137	F55H12.6	ztf-26	DOWN	8.04936	8.16045	6.97582	7.05355	-1.09022	0.46969
1459	WBGene00010183	F57A8.8	fipr-13	DOWN	8.18047	8.1731	6.43606	6.19569	-1.86091	0.275302
1460	WBGene00010185	F57A10.4	F57A10.4	DOWN	11.802	11.8479	10.9191	10.8716	-0.929607	0.525001
1461	WBGene00010193	F57C2.1	btb-20	DOWN	13.5426	13.6193	12.3923	12.4208	-1.17438	0.443075
1462	WBGene00010194	F57C2.2	btb-19	DOWN	14.3373	14.5219	13.2159	13.3711	-1.13615	0.454973
1463	WBGene00010195	F57C2.3	pot-2	DOWN	12.3479	12.3624	11.3278	11.3922	-0.995226	0.501657
1464	WBGene00010274	F58G6.3	F58G6.3	DOWN	8.76744	9.11576	6.70529	7.26758	-1.95517	0.25789
1465	WBGene00010277	F58G6.7	F58G6.7	DOWN	7.81398	7.99834	6.11793	6.53764	-1.57838	0.334859
1466	WBGene00010294	F59A1.8	fbxa-129	DOWN	7.29845	7.25806	6.49468	6.43796	-0.811938	0.569616
1467	WBGene00010305	F59A2.5	F59A2.5	DOWN	11.8717	11.9592	10.6203	10.7814	-1.2146	0.430893
1468	WBGene00010354	H02I12.8	cyp-31A2	DOWN	10.2493	10.5084	9.142	9.24852	-1.18362	0.440245
1469	WBGene00010401	H16D19.3	H16D19.3	DOWN	7.61234	7.81794	6.37054	6.55314	-1.2533	0.419487
1470	WBGene00010420	H28O16.2	mcrs-1	DOWN	9.84847	9.82569	9.23455	9.27007	-0.584765	0.666758
1471	WBGene00010432	H39E23.2	H39E23.2	DOWN	6.69134	6.69134	6.10189	6.05758	-0.611604	0.654469
1472	WBGene00010459	K01C8.7	K01C8.7	DOWN	9.36437	9.58778	8.06624	8.01563	-1.43514	0.36981
1473	WBGene00010460	K01C8.8	clec-142	DOWN	7.94803	8.00803	6.9095	7.05355	-0.996505	0.501213
1474	WBGene00010466	K01D12.7	K01D12.7	DOWN	8.93125	8.98094	7.43461	7.52134	-1.47812	0.358956
1475	WBGene00010472	K01D12.13	cdr-7	DOWN	9.34726	9.11302	7.80432	7.97139	-1.34229	0.394395
1476	WBGene00010474	K01D12.15	K01D12.15	DOWN	8.90078	9.07607	7.35896	7.42947	-1.59421	0.331203
1477	WBGene00010483	K01G12.3	K01G12.3	DOWN	10.7176	10.8429	9.20361	9.36081	-1.49804	0.354033
1478	WBGene00010502	K02C4.3	K02C4.3	DOWN	12.4713	12.6477	11.4364	11.5319	-1.07534	0.474558
1479	WBGene00010528	K03D3.2	K03D3.2	DOWN	7.99468	7.81003	6.45456	6.45456	-1.44779	0.366583
1480	WBGene00010541	K03H1.6	ttr-1	DOWN	10.5228	10.8038	9.10191	9.36081	-1.43192	0.370638
1481	WBGene00010555	K04C1.5	K04C1.5	DOWN	11.6149	11.8644	10.1246	10.292	-1.53137	0.345949
1482	WBGene00010597	K06A4.7	K06A4.7	DOWN	15.2062	15.3951	13.764	13.7341	-1.55157	0.341137
1483	WBGene00010608	K07A1.1	K07A1.1	DOWN	14.714	14.8265	13.8928	13.895	-0.876296	0.544764
1484	WBGene00010637	K07F5.12	K07F5.12	DOWN	11.9012	11.913	10.7431	10.8607	-1.10516	0.464851
1485	WBGene00010655	K08D8.1	K08D8.1	DOWN	7.57984	7.49083	6.45456	6.43796	-1.08907	0.470064
1486	WBGene00010658	K08D8.4	K08D8.4	DOWN	9.88707	9.67798	8.33774	7.49716	-1.86507	0.274509
1487	WBGene00010659	K08D8.5	K08D8.5	DOWN	10.7781	10.6811	7.07767	7.51254	-3.43449	0.0924942
1488	WBGene00010706	K09A11.3	cyp-14A2	DOWN	7.50524	7.48265	6.20979	6.35084	-1.21363	0.431182
1489	WBGene00010707	K09A11.4	cyp-14A3	DOWN	10.4167	10.6796	8.46769	8.84241	-1.89311	0.269227
1490	WBGene00010746	K10D11.2	K10D11.2	DOWN	10.0601	10.0039	7.3915	7.03033	-2.82109	0.141503
1491	WBGene00010793	LLC1.2	LLC1.2	DOWN	13.2284	13.3024	10.8918	10.8871	-2.37589	0.192658
1492	WBGene00010879	M05D6.6	M05D6.6	DOWN	11.9745	11.9678	10.9164	10.9616	-1.03213	0.488986
1493	WBGene00010888	M18.2	dlc-2	DOWN	10.2937	10.2998	9.51684	9.55183	-0.762414	0.589509
1494	WBGene00010904	M88.1	ugt-62	DOWN	10.6687	10.8895	8.76802	9.40518	-1.69249	0.309392
1495	WBGene00010926	M153.3	M153.3	DOWN	6.31285	6.27382	5.57625	5.57625	-0.717084	0.608326
1496	WBGene00010982	R03A10.2	flp-32	DOWN	6.06519	5.99408	5.25681	5.27533	-0.763564	0.589039
1497	WBGene00011000	R03G8.6	R03G8.6	DOWN	8.58183	8.8607	6.75976	6.7923	-1.94524	0.259672
1498	WBGene00011041	R05H5.7	R05H5.7	DOWN	7.33774	7.31545	6.5663	6.4967	-0.795095	0.576305
1499	WBGene00011066	R06C7.9	ztf-15	DOWN	11.9228	12.0992	10.6765	10.7725	-1.28649	0.409947
1500	WBGene00011083	R07B1.12	glo-1	DOWN	9.4121	9.50789	8.16369	8.3781	-1.1891	0.438576
1501	WBGene00011090	R07B7.6	R07B7.6	DOWN	9.48298	9.54073	8.82058	8.77369	-0.714712	0.609327
1502	WBGene00011115	R07E5.7	R07E5.7	DOWN	12.9622	13.0421	12.1752	12.1751	-0.826989	0.563705
1503	WBGene00011134	R08A2.3	ssp-33	DOWN	6.76366	6.50839	5.34779	5.23757	-1.34335	0.394105
1504	WBGene00011155	R09B3.2	R09B3.2	DOWN	17.0379	17.0361	16.1881	16.2214	-0.832255	0.561651
1505	WBGene00011166	R09D1.10	chil-22	DOWN	7.72196	7.60036	5.84346	5.6062	-1.93633	0.261281
1506	WBGene00011167	R09D1.11	chil-23	DOWN	7.77451	7.70482	6.69134	6.74793	-1.02003	0.493106
1507	WBGene00011180	R09H10.2	R09H10.2	DOWN	6.83695	6.8182	6.01349	6.07865	-0.781502	0.581761
1508	WBGene00011181	R09H10.3	R09H10.3	DOWN	12.331	12.2842	10.0032	10.0769	-2.26751	0.207687
1509	WBGene00011182	R09H10.5	R09H10.5	DOWN	11.0533	10.9163	9.69064	9.92005	-1.17945	0.441518
1510	WBGene00011194	R10D12.13	R10D12.13	DOWN	8.59132	8.61699	7.43042	7.46856	-1.15466	0.449171
1511	WBGene00011222	R10H10.3	R10H10.3	DOWN	12.6031	12.6849	10.4223	10.7738	-2.04593	0.242167
1512	WBGene00011225	R10H10.7	R10H10.7	DOWN	11.5107	11.5179	10.4344	10.5895	-1.00232	0.499197
1513	WBGene00011251	R11H6.3	glb-22	DOWN	9.93298	9.83282	8.71801	8.85881	-1.09449	0.468301
1514	WBGene00011262	R13H4.3	pho-8	DOWN	8.49498	8.24251	6.73439	6.56848	-1.71731	0.304115
1515	WBGene00011309	R186.8	R186.8	DOWN	12.5231	12.4037	11.4472	11.4311	-1.02423	0.491671
1516	WBGene00011330	T01D3.6	T01D3.6	DOWN	11.5898	11.8399	10.0827	10.4061	-1.47047	0.360864
1517	WBGene00011334	T01E8.6	mrps-14	DOWN	8.015	8.05679	7.35896	7.34461	-0.684111	0.622389
1518	WBGene00011362	T02B5.1	T02B5.1	DOWN	9.02782	8.11572	5.34336	5.19879	-3.30069	0.101483
1519	WBGene00011416	T04A11.1	T04A11.1	DOWN	9.46163	9.56486	7.82901	7.96601	-1.61574	0.326298
1520	WBGene00011435	T04D3.8	T04D3.8	DOWN	13.9795	14.1213	12.7929	12.8948	-1.20655	0.433303
1521	WBGene00011446	T04F8.8	T04F8.8	DOWN	12.8306	13.0531	11.4386	11.7409	-1.35207	0.39173
1522	WBGene00011478	T05D4.5	T05D4.5	DOWN	7.24024	7.32566	6.20979	6.33094	-1.01259	0.495656
1523	WBGene00011487	T05E12.6	T05E12.6	DOWN	10.5536	10.5895	7.6554	7.58912	-2.9493	0.129471
1524	WBGene00011499	T05G5.4	T05G5.4	DOWN	9.93874	9.94306	8.41362	8.53973	-1.46422	0.362431
1525	WBGene00011513	T06C12.4	fbxa-197	DOWN	11.3086	11.5062	10.304	10.2702	-1.12026	0.46001
1526	WBGene00011556	T07A5.3	vglu-3	DOWN	8.19467	8.30594	6.74793	6.97857	-1.38706	0.382343
1527	WBGene00011571	T07C12.7	ttr-46	DOWN	13.7106	13.7585	12.097	12.2558	-1.55808	0.339604
1528	WBGene00011597	T07G12.6	zim-1	DOWN	12.213	12.2751	11.4132	11.4602	-0.807347	0.571432
1529	WBGene00011662	T09F3.2	T09F3.2	DOWN	10.8767	10.9558	10.1232	10.0406	-0.834326	0.560845
1530	WBGene00011668	T09F5.9	clec-47	DOWN	12.7688	12.0793	9.81754	8.94191	-3.04433	0.121218
1531	WBGene00011670	T09F5.11	fbxa-84	DOWN	6.89388	7.02238	5.62778	5.80522	-1.24163	0.422895
1532	WBGene00011699	T10H4.11	cyp-34A2	DOWN	8.58626	8.97642	7.15074	6.88165	-1.76515	0.294197
1533	WBGene00011718	T11G6.3	T11G6.3	DOWN	10.5831	10.7498	9.6586	9.68347	-0.995421	0.50159
1534	WBGene00011725	T12A7.4	lips-5	DOWN	7.14799	7.14051	5.76613	5.94571	-1.28833	0.409424
1535	WBGene00011741	T12G3.6	T12G3.6	DOWN	15.2856	15.4549	14.3863	14.4055	-0.97431	0.508983
1536	WBGene00011753	T13F3.6	T13F3.6	DOWN	10.4428	10.6932	6.60558	7.34461	-3.59292	0.0828748
1537	WBGene00011803	T16G12.1	T16G12.1	DOWN	8.75547	8.76995	6.9095	6.96159	-1.82716	0.281818
1538	WBGene00011812	T16H12.2	T16H12.2	DOWN	8.83218	8.84034	7.82115	7.80432	-1.02353	0.491913
1539	WBGene00011819	T16H12.11	hal-2	DOWN	12.4425	12.4003	11.4416	11.5429	-0.929209	0.525146
1540	WBGene00011832	T19B10.3	T19B10.3	DOWN	11.6154	11.8824	10.5136	10.6061	-1.18903	0.438598
1541	WBGene00011834	T19B10.6	dvc-1	DOWN	14.7429	14.7982	13.8874	13.9218	-0.865927	0.548694
1542	WBGene00011856	T20D3.2	T20D3.2	DOWN	14.7511	14.7813	13.1228	13.145	-1.63234	0.322565
1543	WBGene00011857	T20D3.3	T20D3.3	DOWN	12.3799	12.4523	11.4726	11.5828	-0.888357	0.540229
1544	WBGene00011858	T20D3.5	T20D3.5	DOWN	13.8821	14.0214	12.8785	12.8824	-1.07126	0.475903
1545	WBGene00011869	T20G5.7	dod-6	DOWN	9.36902	8.7312	6.20979	6.09939	-2.89552	0.134388
1546	WBGene00011870	T20G5.8	T20G5.8	DOWN	12.4138	12.058	10.0221	9.62594	-2.41184	0.187916
1547	WBGene00011872	T20G5.10	blos-1	DOWN	12.9269	12.9323	12.0861	11.9695	-0.901823	0.53521
1548	WBGene00011887	T21B10.5	set-17	DOWN	13.7588	13.8956	12.9002	12.9089	-0.922659	0.527536
1549	WBGene00011929	T22G5.1	T22G5.1	DOWN	7.04137	7.07767	5.74662	5.71947	-1.32648	0.398741
1550	WBGene00011945	T23D8.7	hpo-24	DOWN	10.6943	10.6281	9.85351	9.90731	-0.780771	0.582055
1551	WBGene00011949	T23F6.1	T23F6.1	DOWN	8.32825	8.20241	7.11604	7.08961	-1.16251	0.446736
1552	WBGene00011962	T23G5.2	T23G5.2	DOWN	11.6744	11.6844	10.5987	10.6936	-1.03327	0.4886
1553	WBGene00011979	T24B8.5	T24B8.5	DOWN	13.7421	14.5456	9.83409	9.748	-4.35281	0.0489412
1554	WBGene00012055	T26E4.15	srsx-36	DOWN	7.25091	7.23789	6.12034	6.21255	-1.07795	0.473701
1555	WBGene00012074	T27A8.2	T27A8.2	DOWN	12.0015	12.1768	10.9502	10.9554	-1.13632	0.45492
1556	WBGene00012123	T28D6.3	T28D6.3	DOWN	8.32095	8.74272	6.55314	6.45456	-2.02798	0.245198
1557	WBGene00012134	T28F3.8	T28F3.8	DOWN	11.2073	10.9414	9.35979	9.3548	-1.71707	0.304165
1558	WBGene00012175	W01C9.1	W01C9.1	DOWN	8.18047	7.95588	6.47669	6.72072	-1.46947	0.361114
1559	WBGene00012176	W01C9.2	W01C9.2	DOWN	7.72448	7.36133	5.69511	5.81808	-1.7863	0.289914
1560	WBGene00012195	W02A11.5	bath-34	DOWN	9.12371	9.05796	8.18724	8.12093	-0.93675	0.522408
1561	WBGene00012202	W02B12.4	W02B12.4	DOWN	9.23528	9.28932	7.46856	7.66114	-1.69745	0.308331
1562	WBGene00012217	W02H3.1	W02H3.1	DOWN	9.25471	9.07203	7.89996	7.95814	-1.23432	0.425042
1563	WBGene00012225	W03G11.3	W03G11.3	DOWN	8.42844	8.63398	7.32876	7.30356	-1.21505	0.430759
1564	WBGene00012231	W04A4.2	W04A4.2	DOWN	10.213	10.3597	8.66688	8.81137	-1.54725	0.342162
1565	WBGene00012251	W04E12.6	clec-49	DOWN	9.54803	9.27051	7.82901	8.06423	-1.46265	0.362826
1566	WBGene00012252	W04E12.7	W04E12.7	DOWN	8.14846	8.1731	7.313	7.38285	-0.812857	0.569253
1567	WBGene00012277	W05B10.2	ccch-3	DOWN	13.044	13.1794	12.0065	12.1312	-1.04278	0.485391
1568	WBGene00012291	W06A7.2	W06A7.2	DOWN	9.54073	9.70659	8.35228	8.41594	-1.23955	0.423504
1569	WBGene00012294	W06A7.5	nspa-8	DOWN	7.42947	9.10648	5.74662	5.54567	-2.62183	0.162461
1570	WBGene00012325	W07A12.8	W07A12.8	DOWN	9.53085	9.72761	6.47098	7.15204	-2.81772	0.141834
1571	WBGene00012404	Y6G8.2	Y6G8.2	DOWN	8.55314	8.44413	7.53514	7.4356	-1.01327	0.495423
1572	WBGene00012407	Y7A5A.1	Y7A5A.1	DOWN	11.7693	11.7534	9.44577	9.80005	-2.13843	0.227127
1573	WBGene00012408	Y7A5A.2	Y7A5A.2	DOWN	8.98291	9.13429	7.61781	7.92759	-1.2859	0.410116
1574	WBGene00012439	Y12A6A.1	Y12A6A.1	DOWN	10.2734	10.5647	8.4373	8.76152	-1.81962	0.283295
1575	WBGene00012445	Y16B4A.2	Y16B4A.2	DOWN	9.42725	9.48519	7.45212	7.53514	-1.96259	0.256567
1576	WBGene00012465	Y17G7B.12	Y17G7B.12	DOWN	12.2547	12.4032	11.1112	11.057	-1.24485	0.421953
1577	WBGene00012482	Y18D10A.12	clec-106	DOWN	7.64871	7.57225	6.59063	6.65979	-0.985267	0.505132
1578	WBGene00012509	Y26D4A.12	Y26D4A.12	DOWN	6.38097	6.62038	5.38281	5.40825	-1.10514	0.464857
1579	WBGene00012615	Y38H6C.1	dct-16	DOWN	15.278	15.4735	12.9106	13.1144	-2.36332	0.194344
1580	WBGene00012640	Y38H8A.7	Y38H8A.7	DOWN	10.0248	9.98462	9.27674	9.31928	-0.706703	0.612719
1581	WBGene00012672	Y39B6A.10	Y39B6A.10	DOWN	13.7684	13.7048	12.7018	12.7456	-1.01292	0.495543
1582	WBGene00012675	Y39B6A.13	Y39B6A.13	DOWN	8.27448	8.36556	7.30305	7.33774	-0.999627	0.500129
1583	WBGene00012683	Y39B6A.24	asp-17	DOWN	10.2232	10.4975	8.86448	8.57447	-1.64086	0.320664
1584	WBGene00012715	Y39E4B.2	snpc-1.2	DOWN	13.3822	13.5101	12.4304	12.4544	-1.00374	0.498704
1585	WBGene00012726	Y39G8B.5	Y39G8B.5	DOWN	8.88097	9.03829	7.98607	7.90082	-1.01619	0.494421
1586	WBGene00012728	Y39G8B.9	Y39G8B.9	DOWN	11.0731	11.1454	8.86448	8.44886	-2.45263	0.182677
1587	WBGene00012746	Y40H7A.9	Y40H7A.9	DOWN	8.12552	8.20577	6.88165	7.04137	-1.20413	0.43403
1588	WBGene00012747	Y40H7A.10	Y40H7A.10	DOWN	12.3855	12.3805	9.88734	10.2439	-2.31733	0.200638
1589	WBGene00012780	Y42A5A.5	Y42A5A.5	DOWN	11.187	11.2213	10.3985	10.4309	-0.789441	0.578568
1590	WBGene00012781	Y43C5A.1	nspd-7	DOWN	9.01195	9.28932	6.80346	6.63851	-2.42965	0.18561
1591	WBGene00012782	Y43C5A.2	Y43C5A.2	DOWN	13.7187	13.5806	12.5131	12.2987	-1.24377	0.422268
1592	WBGene00012789	Y43D4A.3	Y43D4A.3	DOWN	9.69286	9.95067	8.64375	8.58074	-1.20952	0.432414
1593	WBGene00012834	Y43F8C.13	Y43F8C.13	DOWN	9.79119	9.82253	8.75508	8.75714	-1.05075	0.482718
1594	WBGene00012867	Y45F10A.4	seld-1	DOWN	9.74661	9.93167	8.62216	8.7244	-1.16586	0.445699
1595	WBGene00012885	Y45F10D.4	Y45F10D.4	DOWN	13.2081	13.1354	12.3719	12.4005	-0.785576	0.58012
1596	WBGene00012916	Y46G5A.28	Y46G5A.28	DOWN	9.64217	9.65388	8.73269	8.79493	-0.884212	0.541783
1597	WBGene00012954	Y47H9C.11	fbxa-217	DOWN	10.6464	10.7509	9.65005	9.72265	-1.01229	0.495759
1598	WBGene00012992	Y48C3A.10	mrpl-20	DOWN	13.2218	13.2647	12.3491	12.4299	-0.853774	0.553335
1599	WBGene00012997	Y48C3A.18	Y48C3A.18	DOWN	11.2806	11.2315	10.3746	10.4309	-0.853279	0.553525
1600	WBGene00013007	Y48E1B.8	Y48E1B.8	DOWN	8.11833	8.09013	5.92206	5.97169	-2.15736	0.224167
1601	WBGene00013035	Y49E10.16	Y49E10.16	DOWN	12.9741	13.0692	11.7172	11.7828	-1.27158	0.414205
1602	WBGene00013037	Y49E10.18	Y49E10.18	DOWN	11.8611	11.8675	9.96063	10.1986	-1.78465	0.290246
1603	WBGene00013041	Y49E10.22	pstk-1	DOWN	10.8491	10.8304	9.86748	9.99743	-0.907329	0.533171
1604	WBGene00013077	Y51A2D.9	ttr-24	DOWN	12.3258	12.595	10.9539	10.7937	-1.58659	0.332958
1605	WBGene00013078	Y51A2D.10	ttr-25	DOWN	12.2486	12.3578	9.73026	9.31588	-2.78013	0.145579
1606	WBGene00013101	Y51H4A.5	Y51H4A.5	DOWN	8.84628	8.61699	6.12034	6.49468	-2.42412	0.186323
1607	WBGene00013118	Y51H4A.24	Y51H4A.24	DOWN	10.4364	10.1635	8.90566	8.9202	-1.38704	0.382349
1608	WBGene00013122	Y52B11A.2	Y52B11A.2	DOWN	10.8517	11.0425	9.57823	9.59532	-1.36032	0.389495
1609	WBGene00013144	Y53C12B.2	Y53C12B.2	DOWN	7.64424	7.66736	6.906	6.85693	-0.774333	0.584659
1610	WBGene00013178	Y53H1A.2	Y53H1A.2	DOWN	11.912	11.9008	11.1303	11.1721	-0.75517	0.592477
1611	WBGene00013207	Y54G9A.4	Y54G9A.4	DOWN	6.82109	6.92221	5.92206	5.92206	-0.949588	0.51778
1612	WBGene00013231	Y56A3A.11	Y56A3A.11	DOWN	13.0919	13.1682	12.257	12.2943	-0.854408	0.553092
1613	WBGene00013237	Y56A3A.19	Y56A3A.19	DOWN	13.463	13.4089	12.7544	12.7251	-0.696191	0.617199
1614	WBGene00013250	Y57A10A.5	Y57A10A.5	DOWN	10.8324	10.9123	9.83953	9.76232	-1.07147	0.475834
1615	WBGene00013275	Y57A10B.3	btb-14	DOWN	10.6214	10.8684	9.38252	9.49461	-1.30632	0.404352
1616	WBGene00013310	Y57G11C.14	Y57G11C.14	DOWN	8.37055	8.39665	7.4417	7.49716	-0.914172	0.530648
1617	WBGene00013329	Y57G11C.40	Y57G11C.40	DOWN	10.5092	10.6631	9.142	9.32836	-1.35094	0.392036
1618	WBGene00013348	Y59A8B.11	fbxa-106	DOWN	12.4657	12.4183	11.4235	11.3188	-1.0709	0.476022
1619	WBGene00013359	Y60A3A.8	Y60A3A.8	DOWN	10.6788	10.6811	10.1032	10.0928	-0.581929	0.66807
1620	WBGene00013375	Y62E10A.4	srsx-25	DOWN	9.14814	9.20143	8.26791	8.302	-0.889834	0.539676
1621	WBGene00013467	Y68A4A.5	Y68A4A.5	DOWN	7.10407	7.04137	6.23143	6.29022	-0.811896	0.569633
1622	WBGene00013481	Y69H2.3	Y69H2.3	DOWN	13.6762	13.6634	12.3698	12.5411	-1.21434	0.430971
1623	WBGene00013484	Y69H2.9	Y69H2.9	DOWN	8.32825	8.18724	6.43796	6.6454	-1.71607	0.304377
1624	WBGene00013489	Y69H2.14	Y69H2.14	DOWN	14.0326	13.8542	12.287	11.6609	-1.96942	0.255355
1625	WBGene00013498	Y70G10A.2	Y70G10A.2	DOWN	8.17547	7.89474	6.32162	6.26925	-1.73967	0.299438
1626	WBGene00013516	Y73F4A.3	Y73F4A.3	DOWN	11.1003	11.1764	10.0405	10.1279	-1.05415	0.481581
1627	WBGene00013559	Y75B8A.28	Y75B8A.28	DOWN	8.10988	8.23945	6.92221	7.07767	-1.17473	0.442967
1628	WBGene00013610	Y102A5C.1	fbxa-206	DOWN	11.8942	12.041	10.8568	10.918	-1.0802	0.472962
1629	WBGene00013654	Y105C5B.15	Y105C5B.15	DOWN	12.4906	12.5913	9.81121	10.2259	-2.52243	0.17405
1630	WBGene00013702	Y106G6D.6	Y106G6D.6	DOWN	9.59672	9.82253	8.31304	8.50644	-1.29988	0.406159
1631	WBGene00013725	Y106G6H.15	ska-1	DOWN	14.285	14.2999	13.6891	13.6857	-0.605032	0.657457
1632	WBGene00013727	Y111B2A.1	Y111B2A.1	DOWN	10.6273	10.6978	9.89538	9.88564	-0.772036	0.58559
1633	WBGene00013740	Y111B2A.20	hut-1	DOWN	12.4392	12.5455	11.5583	11.59	-0.918137	0.529192
1634	WBGene00013797	Y116A8C.20	Y116A8C.20	DOWN	8.35728	8.45246	7.47614	7.42947	-0.952061	0.516893
1635	WBGene00013874	ZC376.2	ZC376.2	DOWN	9.32597	9.34392	8.45902	8.56496	-0.822957	0.565282
1636	WBGene00013884	ZC412.3	ZC412.3	DOWN	9.02782	8.99683	7.45212	6.90879	-1.83187	0.280901
1637	WBGene00013885	ZC412.4	ZC412.4	DOWN	7.0632	7.20318	5.95966	5.88032	-1.2132	0.431311
1638	WBGene00013904	ZC455.4	ugt-6	DOWN	8.20632	8.15421	6.40027	6.63502	-1.66262	0.315864
1639	WBGene00013925	ZK20.4	ZK20.4	DOWN	13.5498	13.6293	12.6705	12.6228	-0.942907	0.520184
1640	WBGene00013946	ZK228.3	ZK228.3	DOWN	7.97889	8.39088	6.2716	6.25275	-1.92271	0.263759
1641	WBGene00013966	ZK287.6	ztf-9	DOWN	11.8081	11.9515	10.4523	10.5905	-1.35839	0.390017
1642	WBGene00013968	ZK287.9	ZK287.9	DOWN	10.3438	10.167	9.20058	9.22537	-1.04244	0.485504
1643	WBGene00013972	ZK384.2	scl-20	DOWN	12.0979	11.78	7.4081	7.90082	-4.28446	0.0513156
1644	WBGene00013978	ZK507.1	ZK507.1	DOWN	6.53764	6.58886	5.94847	5.94571	-0.616158	0.652406
1645	WBGene00013986	ZK512.7	ZK512.7	DOWN	11.5107	11.7592	8.80406	8.86185	-2.80197	0.143391
1646	WBGene00014001	ZK593.1	pyk-2	DOWN	8.31383	8.29144	7.12889	7.21523	-1.13058	0.456733
1647	WBGene00014003	ZK593.3	ZK593.3	DOWN	11.3421	11.1517	9.55645	9.60113	-1.66812	0.314664
1648	WBGene00014041	ZK666.1	ZK666.1	DOWN	8.2323	8.29144	7.54567	7.56462	-0.706728	0.612708
1649	WBGene00014042	ZK666.2	ZK666.2	DOWN	6.76366	7.0632	5.2847	5.38281	-1.57968	0.334557
1650	WBGene00014044	ZK666.4	ZK666.4	DOWN	8.37885	8.32934	7.61412	7.63351	-0.730278	0.602788
1651	WBGene00014047	ZK666.7	clec-61	DOWN	7.42005	6.69134	5.417	5.27533	-1.70953	0.30576
1652	WBGene00014130	ZK892.6	ZK892.6	DOWN	7.91356	7.95306	7.07125	6.98657	-0.9044	0.534255
1653	WBGene00014137	ZK896.6	clec-187	DOWN	9.72405	9.83141	8.03197	8.32934	-1.59708	0.330546
1654	WBGene00014166	ZK945.4	ZK945.4	DOWN	9.92821	10.1019	8.58161	8.77719	-1.33566	0.396211
1655	WBGene00014172	ZK970.2	clpp-1	DOWN	10.8886	10.7071	9.66194	9.71458	-1.10957	0.463431
1656	WBGene00014207	ZK1058.9	ZK1058.9	DOWN	10.0408	10.2388	8.73672	8.57447	-1.48422	0.357442
1657	WBGene00014227	ZK1128.1	ZK1128.1	DOWN	10.9178	11.0025	9.84644	9.84751	-1.11323	0.462259
1658	WBGene00014229	ZK1128.3	ZK1128.3	DOWN	8.02331	8.29323	6.52196	6.53764	-1.62847	0.323431
1659	WBGene00014250	ZK1307.9	ZK1307.9	DOWN	13.7453	13.7741	13.03	13.0736	-0.707923	0.612201
1660	WBGene00014251	ZK1320.1	gstk-1	DOWN	12.2184	12.3033	11.436	11.4888	-0.79844	0.574971
1661	WBGene00014252	ZK1320.2	ZK1320.2	DOWN	15.0078	14.8693	12.4522	12.5583	-2.43331	0.185141
1662	WBGene00014253	ZK1320.3	ZK1320.3	DOWN	8.44471	8.37699	6.63294	6.89096	-1.6489	0.318883
1663	WBGene00014262	ZK1321.4	ZK1321.4	DOWN	8.68135	8.80658	7.31763	7.15074	-1.50978	0.351165
1664	WBGene00014666	C05D12.3	C05D12.3	DOWN	7.77451	8.16808	6.0305	5.97169	-1.9702	0.255218
1665	WBGene00014672	C08F11.6	C08F11.6	DOWN	8.04936	7.99834	7.26266	7.28297	-0.751036	0.594177
1666	WBGene00014730	F01D5.4	F01D5.4	DOWN	12.8275	12.819	11.8788	11.9291	-0.91931	0.528762
1667	WBGene00014811	M162.9	M162.9	DOWN	8.68135	8.63482	7.93165	7.85024	-0.76714	0.587581
1668	WBGene00014826	R13H4.2	R13H4.2	DOWN	10.1255	10.4207	8.68458	7.64062	-2.11048	0.23157
1669	WBGene00014845	T23F1.2	T23F1.2	DOWN	8.6254	8.55497	7.53514	7.29385	-1.17569	0.442671
1670	WBGene00014871	Y37H9A.5	Y37H9A.5	DOWN	15.3692	15.374	14.7219	14.7598	-0.630733	0.645848
1671	WBGene00014917	Y53C10A.13	fbxa-122	DOWN	10.3823	10.451	9.38569	9.29647	-1.07554	0.474493
1672	WBGene00014918	Y53C10A.14	fbxa-123	DOWN	10.4097	10.4166	9.31814	9.45843	-1.02485	0.49146
1673	WBGene00014981	ZK218.9	ZK218.9	DOWN	9.0381	9.00634	8.35228	8.36448	-0.663839	0.631197
1674	WBGene00014987	ZK637.6	ZK637.6	DOWN	11.9693	11.8962	11.1636	11.1643	-0.768756	0.586923
1675	WBGene00015029	B0207.6	B0207.6	DOWN	12.7854	12.8116	12.0145	12.0525	-0.765014	0.588448
1676	WBGene00015044	B0213.15	cyp-34A9	DOWN	11.3608	11.3221	8.96673	9.61708	-2.04954	0.241561
1677	WBGene00015050	B0218.6	clec-51	DOWN	8.46745	8.44886	6.9341	7.22494	-1.37864	0.384582
1678	WBGene00015061	B0228.4	cpna-2	DOWN	7.39252	7.63519	5.69511	5.80522	-1.76369	0.294494
1679	WBGene00015073	B0238.9	B0238.9	DOWN	9.64033	9.60031	8.79474	8.7244	-0.860742	0.550669
1680	WBGene00015110	B0281.3	B0281.3	DOWN	10.3223	10.2502	8.89256	8.96962	-1.35516	0.390891
1681	WBGene00015116	B0286.3	B0286.3	DOWN	11.0168	11.0335	8.9645	9.31928	-1.88329	0.271065
1682	WBGene00015122	B0302.5	B0302.5	DOWN	8.4925	8.62267	7.07767	7.25561	-1.39095	0.381315
1683	WBGene00015134	B0304.2	B0304.2	DOWN	12.5337	12.6362	11.6191	11.5775	-0.986629	0.504656
1684	WBGene00015172	B0410.3	B0410.3	DOWN	9.87652	10.0279	8.62216	8.73672	-1.27277	0.413865
1685	WBGene00015196	B0454.5	B0454.5	DOWN	10.7096	10.9112	8.36117	8.72181	-2.26893	0.207484
1686	WBGene00015279	C01B10.4	C01B10.4	DOWN	8.75914	8.79837	7.63248	7.64871	-1.13816	0.454338
1687	WBGene00015284	C01B10.10	C01B10.10	DOWN	9.80501	9.80177	8.10401	8.31868	-1.59204	0.331702
1688	WBGene00015337	C02D5.3	gsto-2	DOWN	6.63933	6.64746	5.90135	5.94571	-0.719868	0.607153
1689	WBGene00015349	C02F5.6	henn-1	DOWN	8.71905	8.897	7.69153	7.69284	-1.11584	0.461423
1690	WBGene00015355	C02F12.5	C02F12.5	DOWN	14.6514	14.4569	12.9828	12.9763	-1.57458	0.335741
1691	WBGene00015369	C03A7.11	ugt-51	DOWN	8.2347	8.3096	7.4815	7.42055	-0.821127	0.566
1692	WBGene00015382	C03B1.14	C03B1.14	DOWN	10.9077	10.9389	10.3275	10.2964	-0.611412	0.654556
1693	WBGene00015389	C03F11.3	scav-1	DOWN	11.0747	11.1603	10.3239	10.3045	-0.803292	0.57304
1694	WBGene00015391	C03G5.1	sdha-1	DOWN	8.61531	8.53194	7.72196	7.7237	-0.850787	0.554482
1695	WBGene00015393	C03G6.5	C03G6.5	DOWN	8.41231	8.37835	6.2268	6.2716	-2.14613	0.225918
1696	WBGene00015399	C03G6.14	cyp-35A1	DOWN	7.86967	8.25594	5.84346	6.2716	-2.00527	0.249089
1697	WBGene00015407	C03H5.5	C03H5.5	DOWN	8.9393	8.91895	7.93709	8.08283	-0.919167	0.528814
1698	WBGene00015423	C04E6.7	C04E6.7	DOWN	7.73291	7.81794	6.94992	6.94273	-0.829101	0.56288
1699	WBGene00015433	C04E12.2	C04E12.2	DOWN	9.20328	9.23068	7.93709	7.61147	-1.4427	0.367878
1700	WBGene00015434	C04E12.4	C04E12.4	DOWN	8.34871	8.14912	7.03033	6.97857	-1.24446	0.422065
1701	WBGene00015435	C04E12.5	C04E12.5	DOWN	7.25927	7.10556	5.85872	5.8526	-1.32676	0.398664
1702	WBGene00015465	C05C8.8	C05C8.8	DOWN	6.66426	6.69134	5.34779	5.57625	-1.21578	0.43054
1703	WBGene00015469	C05D2.8	C05D2.8	DOWN	12.6819	12.5967	11.2866	11.453	-1.26949	0.414806
1704	WBGene00015532	C06E4.3	C06E4.3	DOWN	7.88408	7.98462	6.72072	6.86861	-1.13968	0.453859
1705	WBGene00015581	C07H6.4	C07H6.4	DOWN	7.22357	7.25454	6.6581	6.63851	-0.590748	0.663998
1706	WBGene00015590	C08C3.2	bath-15	DOWN	10.8769	11.0129	9.648	9.76108	-1.24035	0.42327
1707	WBGene00015599	C08E3.7	fbxa-164	DOWN	6.92525	6.85387	5.69511	5.54567	-1.26917	0.414898
1708	WBGene00015692	C10H11.3	ugt-25	DOWN	12.3545	12.441	10.9838	11.0435	-1.38408	0.383135
1709	WBGene00015694	C10H11.5	ugt-27	DOWN	6.30372	6.45221	5.37437	5.34779	-1.01689	0.494181
1710	WBGene00015698	C10H11.10	kca-1	DOWN	11.8604	11.9043	11.0809	10.9992	-0.842245	0.557775
1711	WBGene00015759	C14C6.5	C14C6.5	DOWN	14.5141	13.7198	11.4794	10.7096	-3.0224	0.123074
1712	WBGene00015780	C14F11.4	C14F11.4	DOWN	8.59132	8.54928	7.8818	7.90382	-0.677493	0.625251
1713	WBGene00015807	C16A3.2	C16A3.2	DOWN	11.2056	11.24	10.2701	10.3369	-0.919341	0.52875
1714	WBGene00015843	C16C8.5	C16C8.5	DOWN	13.0535	13.0801	12.1479	12.1764	-0.904658	0.534159
1715	WBGene00015849	C16C8.11	C16C8.11	DOWN	12.2177	12.2207	11.3862	11.427	-0.812579	0.569363
1716	WBGene00015886	C17B7.12	C17B7.12	DOWN	7.61968	7.44809	6.20979	6.41924	-1.21937	0.429469
1717	WBGene00015932	C17H12.6	C17H12.6	DOWN	6.67405	7.77849	5.11262	5.08654	-2.12669	0.228983
1718	WBGene00015933	C17H12.8	C17H12.8	DOWN	12.7293	12.7464	9.43734	9.27341	-3.38252	0.0958869
1719	WBGene00015938	C17H12.13	anat-1	DOWN	13.6422	13.6956	12.9571	12.9895	-0.695617	0.617445
1720	WBGene00015950	C18A11.4	C18A11.4	DOWN	7.52045	7.69615	5.6062	5.81808	-1.89616	0.268658
1721	WBGene00016013	C23G10.6	C23G10.6	DOWN	9.80177	10.5654	7.08835	7.54567	-2.86658	0.137112
1722	WBGene00016023	C23H5.1	prmt-6	DOWN	8.79416	8.90003	6.16607	6.40027	-2.56393	0.169115
1723	WBGene00016027	C23H5.8	C23H5.8	DOWN	13.4538	13.6145	9.82569	10.5822	-3.33021	0.0994274
1724	WBGene00016046	C24B5.4	C24B5.4	DOWN	9.73303	9.93298	7.82115	7.81078	-2.01704	0.247064
1725	WBGene00016052	C24B9.9	dod-3	DOWN	12.5103	12.4894	9.33774	9.3316	-3.16518	0.111477
1726	WBGene00016056	C24D10.5	C24D10.5	DOWN	10.8195	10.817	9.58753	9.76604	-1.14146	0.453301
1727	WBGene00016061	C24G6.6	hpo-15	DOWN	8.56264	8.51815	7.53514	7.54567	-0.999996	0.500001
1728	WBGene00016093	C25E10.3	srsx-34	DOWN	9.61204	9.72478	8.81496	8.79038	-0.865743	0.548764
1729	WBGene00016095	C25E10.5	C25E10.5	DOWN	10.146	10.3657	9.13207	9.16937	-1.1051	0.464871
1730	WBGene00016112	C25H3.3	C25H3.3	DOWN	11.1092	11.1749	10.3269	10.3659	-0.79562	0.576096
1731	WBGene00016113	C25H3.4	C25H3.4	DOWN	12.0404	12.2756	11.0248	10.9333	-1.17896	0.44167
1732	WBGene00016129	C26B2.7	C26B2.7	DOWN	12.8001	12.8167	11.8063	11.818	-0.996257	0.501299
1733	WBGene00016134	C26B9.5	C26B9.5	DOWN	11.7911	11.9637	10.6168	10.8015	-1.16824	0.444965
1734	WBGene00016142	C26E6.6	mrps-18C	DOWN	10.7473	10.7754	10.0423	10.0009	-0.739753	0.598842
1735	WBGene00016162	C27D6.4	crh-2	DOWN	8.6682	8.63263	8.00207	8.02059	-0.639085	0.64212
1736	WBGene00016177	C28C12.1	C28C12.1	DOWN	8.74291	8.78992	7.27311	7.45319	-1.40327	0.378072
1737	WBGene00016217	C29F9.2	C29F9.2	DOWN	8.84728	8.82422	7.28244	7.51254	-1.43826	0.369012
1738	WBGene00016226	C29F9.12	C29F9.12	DOWN	10.3574	10.3589	8.39319	8.6133	-1.8549	0.276452
1739	WBGene00016236	C29H12.5	cec-9	DOWN	11.3516	11.3963	10.2408	10.2747	-1.11618	0.461313
1740	WBGene00016266	C30F12.7	idhg-2	DOWN	9.06463	9.26433	7.685	7.64062	-1.50167	0.353145
1741	WBGene00016274	C30G12.2	C30G12.2	DOWN	10.1971	10.1489	7.21523	7.87107	-2.62985	0.161561
1742	WBGene00016277	C30G12.6	C30G12.6	DOWN	12.2514	12.2696	11.6218	11.607	-0.646104	0.639004
1743	WBGene00016317	C32D5.10	C32D5.10	DOWN	12.2793	12.3125	11.6932	11.7192	-0.589656	0.664501
1744	WBGene00016353	C33F10.4	C33F10.4	DOWN	11.4041	11.5217	10.5054	10.5538	-0.933264	0.523672
1745	WBGene00016395	C34B2.10	C34B2.10	DOWN	13.5777	13.7238	12.5828	12.6002	-1.05929	0.479867
1746	WBGene00016402	C34D4.10	C34D4.10	DOWN	11.3786	11.3972	10.3336	10.3148	-1.06364	0.478422
1747	WBGene00016411	C34E10.10	C34E10.10	DOWN	12.4187	12.5378	11.4162	11.4922	-1.02406	0.491729
1748	WBGene00016460	C35E7.8	C35E7.8	DOWN	10.0963	10.2462	8.87193	8.9505	-1.26004	0.417533
1749	WBGene00016481	C36C5.12	C36C5.12	DOWN	7.61234	7.79069	6.26474	6.21255	-1.46287	0.36277
1750	WBGene00016484	C36C5.15	C36C5.15	DOWN	8.06624	8.06624	6.2268	6.47291	-1.71638	0.304311
1751	WBGene00016486	C36C9.3	fbxa-170	DOWN	10.6423	10.8092	9.48969	9.5974	-1.18222	0.440673
1752	WBGene00016494	C37A2.8	C37A2.8	DOWN	12.3383	12.4686	11.4173	11.3776	-1.00605	0.497906
1753	WBGene00016505	C37C3.13	ttr-33	DOWN	6.89388	6.90879	6.01349	6.01349	-0.887842	0.540422
1754	WBGene00016516	C38C3.8	C38C3.8	DOWN	7.45106	7.48669	6.32162	6.17581	-1.22016	0.429235
1755	WBGene00016535	C39D10.8	C39D10.8	DOWN	9.67712	9.5916	8.70692	8.63032	-0.965743	0.512015
1756	WBGene00016588	C42C1.10	hpo-12	DOWN	12.1941	12.173	11.4004	11.381	-0.792811	0.577218
1757	WBGene00016590	C42C1.12	C42C1.12	DOWN	13.4527	13.513	12.2764	12.3956	-1.14683	0.451616
1758	WBGene00016623	C44B7.1	psmd-9	DOWN	14.6836	14.7933	13.7359	13.716	-1.01251	0.495682
1759	WBGene00016629	C44B7.7	C44B7.7	DOWN	10.5797	10.6973	9.54341	9.6608	-1.03638	0.487549
1760	WBGene00016657	C44E12.1	C44E12.1	DOWN	7.0112	6.97857	5.85872	5.97169	-1.07968	0.473134
1761	WBGene00016658	C45B2.1	C45B2.1	DOWN	10.2458	10.9687	7.8818	8.92231	-2.20521	0.216854
1762	WBGene00016664	C45E5.1	C45E5.1	DOWN	8.4342	8.3434	6.95891	7.14419	-1.33725	0.395774
1763	WBGene00016669	C45G7.2	ilys-2	DOWN	14.6961	14.5374	12.2649	12.6433	-2.16262	0.223351
1764	WBGene00016714	C46F2.1	C46F2.1	DOWN	8.68135	9.00037	7.28988	7.49716	-1.44734	0.366697
1765	WBGene00016722	C46G7.2	C46G7.2	DOWN	10.3961	10.7302	8.54928	8.55314	-2.01194	0.247939
1766	WBGene00016767	C49C8.3	C49C8.3	DOWN	11.7146	11.7755	10.9197	10.9144	-0.828004	0.563308
1767	WBGene00016769	C49C8.5	C49C8.5	DOWN	11.395	11.3941	10.1512	9.90942	-1.36427	0.388432
1768	WBGene00016778	C49D10.10	nep-3	DOWN	7.33339	7.27311	6.35294	6.2716	-0.990978	0.503137
1769	WBGene00016822	C50E3.11	C50E3.11	DOWN	12.6593	12.5148	11.2773	11.389	-1.25387	0.419323
1770	WBGene00016823	C50E3.12	C50E3.12	DOWN	12.1794	12.065	10.8414	11.064	-1.16951	0.444572
1771	WBGene00016824	C50E3.13	C50E3.13	DOWN	11.834	11.6777	10.5603	10.5971	-1.17712	0.442232
1772	WBGene00016844	C50F7.4	sucg-1	DOWN	13.2323	13.3304	12.1953	12.1974	-1.085	0.471391
1773	WBGene00016846	C50F7.6	C50F7.6	DOWN	10.8071	10.8403	9.71779	9.69064	-1.1195	0.460252
1774	WBGene00016863	C52A10.2	C52A10.2	DOWN	9.33731	9.31841	8.60481	8.64375	-0.703578	0.614047
1775	WBGene00016875	C52D10.1	C52D10.1	DOWN	7.18569	7.25454	5.94571	5.97169	-1.26142	0.417135
1776	WBGene00016892	C53A3.2	C53A3.2	DOWN	8.77467	9.17999	7.21747	7.20429	-1.76645	0.293931
1777	WBGene00016930	C54G6.1	madf-6	DOWN	9.43748	9.44915	8.44886	8.41283	-1.01247	0.495696
1778	WBGene00016932	C54G6.3	C54G6.3	DOWN	6.74793	6.64369	5.57625	5.38281	-1.21628	0.430392
1779	WBGene00016939	C55B6.1	C55B6.1	DOWN	10.6121	10.762	9.4162	9.53184	-1.21305	0.431355
1780	WBGene00016943	C55B7.4	acdh-1	DOWN	13.2101	13.4488	10.9013	11.1992	-2.27919	0.206013
1781	WBGene00016957	C55F2.1	C55F2.1	DOWN	8.92712	8.92643	7.29663	7.50078	-1.52807	0.34674
1782	WBGene00016980	C56G2.5	C56G2.5	DOWN	8.64784	8.67298	7.55241	7.55132	-1.10854	0.463762
1783	WBGene00017005	D1007.8	D1007.8	DOWN	12.4	12.5272	11.5283	11.5799	-0.909518	0.532363
1784	WBGene00017037	D1069.3	D1069.3	DOWN	9.00217	9.11137	8.03785	8.10988	-0.982907	0.505959
1785	WBGene00017071	D2096.3	aagr-1	DOWN	11.9505	11.9542	10.3648	10.6822	-1.42881	0.371437
1786	WBGene00017089	E01A2.7	poml-2	DOWN	9.40469	9.49335	8.32095	8.21833	-1.17938	0.441541
1787	WBGene00017093	E02C12.8	E02C12.8	DOWN	7.61234	7.46226	5.92206	6.0357	-1.55842	0.339523
1788	WBGene00017098	E02D9.1	E02D9.1	DOWN	9.79652	9.69373	8.69431	8.68482	-1.05555	0.481112
1789	WBGene00017103	E02H9.5	klo-2	DOWN	8.91342	8.88248	8.01838	7.92759	-0.924961	0.526695
1790	WBGene00017105	E02H9.7	E02H9.7	DOWN	9.32488	9.30817	8.28407	8.33197	-1.0085	0.497063
1791	WBGene00017128	E04F6.9	E04F6.9	DOWN	13.9149	14.3937	12.5397	12.409	-1.67994	0.312096
1792	WBGene00017131	E04F6.15	E04F6.15	DOWN	8.56264	8.66278	6.37054	6.56848	-2.1432	0.226377
1793	WBGene00017138	EEED8.10	EEED8.10	DOWN	12.0493	12.1399	11.3024	11.2555	-0.815674	0.568143
1794	WBGene00017151	EGAP9.3	EGAP9.3	DOWN	7.91956	8.07087	6.35294	6.37054	-1.63347	0.322312
1795	WBGene00017159	F01F1.2	F01F1.2	DOWN	14.9605	15.167	13.968	14.0225	-1.06852	0.476807
1796	WBGene00017168	F01F1.14	F01F1.14	DOWN	8.22084	7.93977	6.82573	6.92221	-1.20634	0.433367
1797	WBGene00017177	F02E8.4	F02E8.4	DOWN	11.7525	11.7459	10.7771	10.9028	-0.909254	0.53246
1798	WBGene00017201	F07C4.7	grsp-4	DOWN	10.3722	10.7261	9.04867	8.70692	-1.67139	0.313951
1799	WBGene00017301	F09F7.4	F09F7.4	DOWN	10.5009	10.5389	9.39906	9.51136	-1.06468	0.47808
1800	WBGene00017319	F09G8.3	mrps-9	DOWN	12.4197	12.3884	11.8194	11.7973	-0.595634	0.661753
1801	WBGene00017322	F09G8.8	clec-160	DOWN	10.8997	11.0595	9.27169	9.48371	-1.60193	0.329436
1802	WBGene00017336	F10D2.11	ugt-41	DOWN	10.8296	11.2884	9.33525	9.5542	-1.61429	0.326626
1803	WBGene00017374	F10G7.11	ttr-41	DOWN	14.2048	13.9407	11.6399	11.6523	-2.42665	0.185997
1804	WBGene00017388	F11G11.13	F11G11.13	DOWN	9.52176	9.27988	7.52134	7.49716	-1.89157	0.269513
1805	WBGene00017397	F12A10.8	F12A10.8	DOWN	11.7886	11.7556	10.712	10.7397	-1.04622	0.484234
1806	WBGene00017402	F12E12.1	F12E12.1	DOWN	11.5605	11.5898	10.9687	10.9774	-0.60209	0.658799
1807	WBGene00017436	F13H8.3	F13H8.3	DOWN	9.80805	10.1107	7.76788	7.76037	-2.19523	0.218358
1808	WBGene00017441	F13H8.8	F13H8.8	DOWN	9.12437	9.28266	8.02331	8.11511	-1.1343	0.455556
1809	WBGene00017443	F13H8.11	F13H8.11	DOWN	9.56881	9.52412	7.92759	8.23945	-1.46294	0.362753
1810	WBGene00017452	F14D2.4	bath-29	DOWN	9.5702	9.62235	8.41751	8.44886	-1.16309	0.446555
1811	WBGene00017460	F14D2.12	bath-30	DOWN	12.4484	12.5263	11.4764	11.4436	-1.02733	0.490617
1812	WBGene00017461	F14D2.13	bath-28	DOWN	13.0369	12.9802	12.1097	12.1089	-0.899281	0.536154
1813	WBGene00017483	F15E6.2	lgc-22	DOWN	10.695	10.6989	9.30041	9.19873	-1.44738	0.366687
1814	WBGene00017484	F15E6.3	F15E6.3	DOWN	13.105	13.1833	11.1327	11.2962	-1.92966	0.262491
1815	WBGene00017485	F15E6.4	F15E6.4	DOWN	11.3473	12.5642	9.11071	9.56308	-2.61887	0.162795
1816	WBGene00017501	F15E11.15	pud-3	DOWN	8.74377	9.81925	6.99993	7.4356	-2.06375	0.239193
1817	WBGene00017537	F17A9.5	F17A9.5	DOWN	9.05612	9.04085	7.78995	7.99331	-1.15686	0.448488
1818	WBGene00017539	F17E9.2	F17E9.2	DOWN	11.2633	11.3506	9.68026	9.90204	-1.51583	0.349696
1819	WBGene00017548	F18A1.7	F18A1.7	DOWN	15.6902	15.7157	14.8479	14.9503	-0.803842	0.572822
1820	WBGene00017567	F18E3.11	F18E3.11	DOWN	8.69305	8.56758	6.9341	6.94722	-1.68965	0.310001
1821	WBGene00017584	F19B10.2	F19B10.2	DOWN	11.9571	12.0147	11.3049	11.3313	-0.667814	0.62946
1822	WBGene00017591	F19C7.1	F19C7.1	DOWN	11.3759	11.4167	9.64665	9.81433	-1.66584	0.315162
1823	WBGene00017641	F20D12.1	csr-1	DOWN	12.379	12.2785	11.4497	11.3717	-0.918021	0.529234
1824	WBGene00017668	F21E9.4	ins-39	DOWN	7.11861	7.14419	6.35939	6.40027	-0.751568	0.593957
1825	WBGene00017673	F21F3.3	F21F3.3	DOWN	8.55645	8.35728	6.73439	7.08961	-1.54487	0.342727
1826	WBGene00017674	F21F3.4	F21F3.4	DOWN	11.6238	11.7383	10.6973	10.6873	-0.988778	0.503905
1827	WBGene00017686	F21H12.6	tpp-2	DOWN	8.78949	8.93125	7.70916	7.7237	-1.14394	0.452521
1828	WBGene00017687	F22A3.1	ets-4	DOWN	10.8886	10.945	9.52448	9.70377	-1.30268	0.405374
1829	WBGene00017688	F22A3.2	ttr-35	DOWN	10.7817	11.1229	9.56998	9.58987	-1.37236	0.386259
1830	WBGene00017691	F22A3.6	ilys-5	DOWN	16.9014	17.177	14.1529	14.5042	-2.71064	0.152762
1831	WBGene00017696	F22B7.6	polk-1	DOWN	11.9588	12.0935	10.4848	10.4932	-1.53712	0.344574
1832	WBGene00017701	F22D3.5	F22D3.5	DOWN	11.2641	11.2952	9.74777	9.79147	-1.51006	0.351097
1833	WBGene00017718	F22F4.5	F22F4.5	DOWN	10.5861	10.7763	9.54803	9.58371	-1.11533	0.461586
1834	WBGene00017751	F23F12.3	F23F12.3	DOWN	6.19797	6.19569	5.12842	5.08654	-1.08935	0.469974
1835	WBGene00017765	F25B4.1	gcst-1	DOWN	12.7561	12.8264	12.0425	12.0665	-0.7367	0.600111
1836	WBGene00017770	F25B4.7	F25B4.7	DOWN	12.8298	12.8648	11.9008	11.9428	-0.925521	0.52649
1837	WBGene00017771	F25B4.8	F25B4.8	DOWN	9.56881	9.51805	7.24745	7.33774	-2.25084	0.210102
1838	WBGene00017772	F25B4.9	clec-1	DOWN	13.8633	14.0003	12.3383	11.9297	-1.79773	0.287626
1839	WBGene00017780	F25E2.2	F25E2.2	DOWN	8.30931	8.62625	6.30859	6.25275	-2.18711	0.219591
1840	WBGene00017781	F25E2.3	F25E2.3	DOWN	9.55309	9.49335	8.71801	8.75464	-0.786895	0.57959
1841	WBGene00017806	F26A1.8	F26A1.8	DOWN	7.08835	7.0632	6.10189	5.94571	-1.05198	0.482307
1842	WBGene00017829	F26F4.9	F26F4.9	DOWN	10.9252	11.0066	10.1208	10.1822	-0.81438	0.568653
1843	WBGene00017840	F26G1.4	ttm-2	DOWN	9.35493	9.26135	8.15863	8.02743	-1.21511	0.430741
1844	WBGene00017847	F27B3.5	F27B3.5	DOWN	11.9474	11.9466	11.3294	11.3574	-0.603567	0.658125
1845	WBGene00017880	F28A12.3	F28A12.3	DOWN	7.95588	7.85186	6.62038	6.58537	-1.301	0.405845
1846	WBGene00017881	F28A12.4	asp-13	DOWN	13.6143	13.6713	10.6548	11.1685	-2.73115	0.150606
1847	WBGene00017886	F28B3.5	F28B3.5	DOWN	12.8797	13.0218	11.6583	11.7165	-1.26337	0.416571
1848	WBGene00017892	F28B4.3	F28B4.3	DOWN	11.6013	11.6609	9.77266	8.62625	-2.43168	0.185349
1849	WBGene00017916	F29A7.6	F29A7.6	DOWN	12.0679	11.9397	11.0218	11.0909	-0.947403	0.518565
1850	WBGene00017931	F29G9.2	F29G9.2	DOWN	12.9861	12.9593	12.0792	12.12	-0.873112	0.545968
1851	WBGene00017962	F31F4.15	fbxa-72	DOWN	8.76744	9.11302	6.9341	7.14419	-1.90109	0.267741
1852	WBGene00017964	F31F7.1	F31F7.1	DOWN	13.4796	13.5243	12.6885	12.676	-0.819658	0.566576
1853	WBGene00018014	F33G12.2	F33G12.2	DOWN	10.5854	10.6896	9.65005	9.72023	-0.952376	0.516781
1854	WBGene00018015	F33G12.3	F33G12.3	DOWN	9.60351	9.61864	8.5756	8.57447	-1.03604	0.487663
1855	WBGene00018054	F35F10.4	F35F10.4	DOWN	8.98857	8.93125	7.69153	7.45319	-1.38755	0.382213
1856	WBGene00018118	F36H12.2	F36H12.2	DOWN	10.9737	10.9714	10.3239	10.3413	-0.639993	0.641716
1857	WBGene00018138	F37B4.7	folt-2	DOWN	9.47528	10.0587	7.24367	7.40111	-2.44462	0.183695
1858	WBGene00018146	F37C4.6	F37C4.6	DOWN	8.82299	8.88572	7.0426	7.3277	-1.6692	0.314427
1859	WBGene00018148	F37C4.8	F37C4.8	DOWN	7.19443	7.11456	5.4417	5.63554	-1.61588	0.326267
1860	WBGene00018153	F37C12.10	F37C12.10	DOWN	10.4161	10.2232	8.51724	8.58074	-1.77064	0.293079
1861	WBGene00018160	F38A5.1	odr-8	DOWN	10.1723	10.1816	9.52399	9.57563	-0.627122	0.647467
1862	WBGene00018174	F38B6.4	F38B6.4	DOWN	9.06068	8.7509	7.58912	7.66374	-1.27936	0.411978
1863	WBGene00018189	F38H12.3	nhr-181	DOWN	9.86104	9.7492	8.64763	8.75212	-1.10525	0.464822
1864	WBGene00018195	F39E9.2	btb-16	DOWN	10.044	10.0395	7.62789	7.75642	-2.34958	0.196203
1865	WBGene00018200	F39E9.11	btb-17	DOWN	9.08355	8.99076	6.97857	7.28015	-1.90779	0.266501
1866	WBGene00018217	F40A3.2	F40A3.2	DOWN	8.56073	8.68874	7.30852	7.44394	-1.2485	0.420885
1867	WBGene00018224	F40B1.2	bath-18	DOWN	7.88864	7.91837	7.04137	6.9341	-0.915773	0.53006
1868	WBGene00018240	F40G9.2	cox-17	DOWN	13.2202	13.2781	12.4425	12.5021	-0.77679	0.583664
1869	WBGene00018249	F40H3.1	F40H3.1	DOWN	11.5689	11.7017	10.4385	10.5882	-1.12194	0.459476
1870	WBGene00018250	F40H3.2	F40H3.2	DOWN	7.50875	7.5835	6.5796	6.6454	-0.933628	0.52354
1871	WBGene00018257	F41B4.1	F41B4.1	DOWN	7.49288	7.43879	6.78066	6.81139	-0.669812	0.628588
1872	WBGene00018267	F41C3.1	F41C3.1	DOWN	9.76127	9.5974	8.06152	8.48392	-1.40662	0.377195
1873	WBGene00018286	F41E6.5	F41E6.5	DOWN	11.2405	10.9157	9.08036	9.25677	-1.90954	0.266177
1874	WBGene00018335	F42A9.6	F42A9.6	DOWN	13.4807	13.5924	12.5913	12.6159	-0.932939	0.52379
1875	WBGene00018342	F42A10.6	F42A10.6	DOWN	12.2597	12.3749	9.97453	10.1953	-2.23236	0.21281
1876	WBGene00018343	F42A10.7	F42A10.7	DOWN	12.5954	12.9557	11.1696	11.1156	-1.63295	0.322429
1877	WBGene00018353	F42G2.4	fbxa-182	DOWN	8.74291	8.80308	7.32438	7.6262	-1.2977	0.406773
1878	WBGene00018354	F42G2.5	F42G2.5	DOWN	7.00137	6.9341	5.79224	5.88032	-1.13146	0.456455
1879	WBGene00018357	F42G8.6	moc-3	DOWN	11.9671	12.0134	11.068	11.0537	-0.929432	0.525065
1880	WBGene00018375	F43C9.1	F43C9.1	DOWN	9.02989	8.90747	6.12034	6.33094	-2.74304	0.14937
1881	WBGene00018380	F43C11.3	decr-1.1	DOWN	10.2499	10.3528	7.66919	7.64424	-2.64463	0.159914
1882	WBGene00018393	F43E2.5	msra-1	DOWN	12.5656	12.6124	11.9327	11.9543	-0.645494	0.639274
1883	WBGene00018399	F43H9.3	F43H9.3	DOWN	12.3068	12.4027	11.4078	11.4201	-0.940792	0.520947
1884	WBGene00018409	F44B9.8	F44B9.8	DOWN	12.5489	12.5366	11.5791	11.6392	-0.933603	0.523549
1885	WBGene00018423	F44E2.10	F44E2.10	DOWN	13.138	13.1822	12.0923	12.2534	-0.987244	0.504441
1886	WBGene00018424	F44E7.2	F44E7.2	DOWN	12.7273	12.7746	11.5769	11.7776	-1.07369	0.475103
1887	WBGene00018426	F44E7.4	F44E7.4	DOWN	11.2073	11.1811	10.1048	9.99508	-1.14426	0.452423
1888	WBGene00018443	F45C12.12	btb-7	DOWN	9.74289	9.85746	8.70692	8.84949	-1.02197	0.492444
1889	WBGene00018509	F46F11.6	F46F11.6	DOWN	13.5386	13.5755	12.8845	12.8794	-0.675101	0.626288
1890	WBGene00018513	F46F11.10	F46F11.10	DOWN	10.8722	10.9873	9.81121	9.97461	-1.03683	0.487397
1891	WBGene00018523	F46H5.8	lact-1	DOWN	9.37201	9.27742	8.20577	8.21467	-1.1145	0.461852
1892	WBGene00018599	F48C1.6	F48C1.6	DOWN	10.813	10.867	10.148	10.1279	-0.702007	0.614716
1893	WBGene00018602	F48D6.4	F48D6.4	DOWN	13.1017	13.0104	11.0979	11.1246	-1.94478	0.259754
1894	WBGene00018635	F49E8.1	nprl-2	DOWN	9.51559	9.52916	8.87609	8.85497	-0.656847	0.634263
1895	WBGene00018643	F49F1.1	F49F1.1	DOWN	9.55733	9.75365	7.18813	7.11456	-2.50415	0.17627
1896	WBGene00018645	F49F1.5	F49F1.5	DOWN	9.4121	9.13914	8.08481	8.05802	-1.20421	0.434008
1897	WBGene00018646	F49F1.6	mul-1	DOWN	10.1885	10.3413	9.00705	8.85881	-1.33196	0.397228
1898	WBGene00018659	F52C6.2	F52C6.2	DOWN	11.5908	11.5894	10.8312	10.7805	-0.78424	0.580658
1899	WBGene00018660	F52C6.3	F52C6.3	DOWN	12.2414	12.4089	11.1693	11.0822	-1.19936	0.435469
1900	WBGene00018665	F52C6.8	bath-4	DOWN	8.91117	8.91452	7.67875	7.70642	-1.22026	0.429204
1901	WBGene00018668	F52C6.11	bath-2	DOWN	12.093	12.1954	11.2551	11.303	-0.865154	0.548988
1902	WBGene00018679	F52C12.2	F52C12.2	DOWN	9.04561	8.98187	7.82115	7.84097	-1.18268	0.440532
1903	WBGene00018755	F53C3.12	bcmo-2	DOWN	9.73303	9.88887	7.59835	7.82597	-2.09879	0.233454
1904	WBGene00018760	F53E10.4	irg-3	DOWN	11.0866	11.1915	8.49474	8.64831	-2.56749	0.168698
1905	WBGene00018808	F54D10.7	F54D10.7	DOWN	13.924	13.9284	12.9249	13.0385	-0.944451	0.519627
1906	WBGene00018863	F55A12.2	F55A12.2	DOWN	9.68387	9.86882	8.69179	8.70169	-1.07961	0.473157
1907	WBGene00018867	F55A12.10	F55A12.10	DOWN	13.3078	13.3273	12.6611	12.6489	-0.662558	0.631757
1908	WBGene00018885	F55E10.6	F55E10.6	DOWN	9.18363	9.48748	5.85872	6.19569	-3.30835	0.100946
1909	WBGene00018903	F55G1.7	F55G1.7	DOWN	9.97665	10.1365	8.38124	8.64742	-1.54223	0.343354
1910	WBGene00018912	F56A4.4	F56A4.4	DOWN	9.02989	9.56486	6.9095	6.96159	-2.36183	0.194544
1911	WBGene00018927	F56A11.7	F56A11.7	DOWN	8.30314	8.30594	7.57887	7.61147	-0.709375	0.611585
1912	WBGene00018939	F56C3.2	fbxa-190	DOWN	7.73291	7.57225	5.94571	6.25275	-1.55335	0.340717
1913	WBGene00018946	F56C3.9	F56C3.9	DOWN	7.50524	7.53211	6.49468	6.40631	-1.06818	0.476919
1914	WBGene00018951	F56C9.7	F56C9.7	DOWN	13.8488	13.9357	11.549	11.7063	-2.2646	0.208107
1915	WBGene00018959	F56D1.1	F56D1.1	DOWN	12.7845	12.8671	11.9419	11.9525	-0.878643	0.543879
1916	WBGene00018984	F56F10.1	F56F10.1	DOWN	12.4366	12.5716	10.4737	10.6164	-1.95905	0.257197
1917	WBGene00019001	F57B10.3	ipgm-1	DOWN	14.0136	14.0447	13.3538	13.2885	-0.708017	0.612161
1918	WBGene00019011	F57C9.4	F57C9.4	DOWN	12.1937	12.2309	11.3307	11.3719	-0.860977	0.55058
1919	WBGene00019017	F57F4.4	F57F4.4	DOWN	10.6635	10.917	8.99275	8.60809	-1.98984	0.251766
1920	WBGene00019021	F57H12.6	F57H12.6	DOWN	7.0632	6.95956	6.08914	5.94571	-0.993955	0.502099
1921	WBGene00019022	F58A6.1	F58A6.1	DOWN	9.45043	9.58288	8.47992	8.5572	-0.998094	0.500661
1922	WBGene00019029	F58B6.1	F58B6.1	DOWN	8.58183	9.15178	7.17339	7.38285	-1.58868	0.332474
1923	WBGene00019076	F59A3.3	mrpl-24	DOWN	11.2353	11.2258	9.91858	10.0703	-1.23614	0.424506
1924	WBGene00019105	F59D6.3	asp-8	DOWN	7.50875	7.43042	5.84346	5.5945	-1.75061	0.297177
1925	WBGene00019138	F59H6.8	bath-21	DOWN	8.30314	8.31813	7.70143	7.65356	-0.633139	0.644772
1926	WBGene00019139	F59H6.9	bath-1	DOWN	9.815	9.84787	9.17258	9.15334	-0.668472	0.629173
1927	WBGene00019141	F59H6.11	bath-5	DOWN	11.6627	11.9286	10.5687	10.5739	-1.22435	0.42799
1928	WBGene00019142	F59H6.12	btb-4	DOWN	10.3649	10.394	9.53664	9.54341	-0.839453	0.558855
1929	WBGene00019187	H11E01.2	H11E01.2	DOWN	9.0707	8.89256	7.81242	7.94161	-1.10462	0.465026
1930	WBGene00019197	H14A12.5	H14A12.5	DOWN	11.6636	11.7478	10.5758	10.7205	-1.0576	0.480432
1931	WBGene00019203	H14N18.3	ttr-47	DOWN	12.2393	12.4229	10.7535	10.9163	-1.49618	0.35449
1932	WBGene00019208	H17B01.3	lips-14	DOWN	9.30992	9.44732	5.97439	6.09939	-3.34172	0.0986372
1933	WBGene00019268	H41C03.1	H41C03.1	DOWN	10.1608	10.3567	9.15397	9.08339	-1.14008	0.453734
1934	WBGene00019288	K02A2.1	K02A2.1	DOWN	6.6581	6.69134	6.04088	6.07865	-0.614957	0.652949
1935	WBGene00019332	K02F3.9	K02F3.9	DOWN	10.1344	10.2984	8.20753	8.24423	-1.99053	0.251647
1936	WBGene00019368	K03H6.2	K03H6.2	DOWN	9.88962	10.1917	8.32547	8.55314	-1.60135	0.329567
1937	WBGene00019376	K04A8.5	lipl-4	DOWN	8.31813	7.46856	6.16607	5.92206	-1.84928	0.277531
1938	WBGene00019431	K06A5.3	K06A5.3	DOWN	9.04561	9.22714	7.9423	8.08283	-1.12381	0.458879
1939	WBGene00019439	K06B9.2	K06B9.2	DOWN	11.5932	11.7003	10.4693	10.3148	-1.25467	0.419089
1940	WBGene00019464	K07B1.4	K07B1.4	DOWN	7.685	7.89474	6.6581	6.67565	-1.12299	0.45914
1941	WBGene00019472	K07C6.4	cyp-35B1	DOWN	8.68828	9.01718	5.69511	5.99408	-3.00813	0.124297
1942	WBGene00019519	K08B5.2	K08B5.2	DOWN	10.3746	10.2894	9.31614	9.33774	-1.00506	0.498248
1943	WBGene00019550	K09C4.5	K09C4.5	DOWN	8.61531	8.34112	7.18813	7.30633	-1.23098	0.426027
1944	WBGene00019604	K09H11.7	K09H11.7	DOWN	11.4311	11.4784	9.90409	10.139	-1.43321	0.370307
1945	WBGene00019605	K10B2.2	K10B2.2	DOWN	6.6581	6.6581	5.58706	5.48674	-1.1212	0.45971
1946	WBGene00019619	K10C2.3	asp-14	DOWN	12.5832	13.0538	9.44732	9.55051	-3.31961	0.100161
1947	WBGene00019653	K11G9.2	K11G9.2	DOWN	7.57418	7.59297	6.5663	6.30964	-1.1456	0.452
1948	WBGene00019655	K11G9.5	K11G9.5	DOWN	8.58183	8.85724	7.24745	7.44809	-1.37177	0.386417
1949	WBGene00019668	K12B6.3	fil-2	DOWN	6.60558	6.37054	5.34779	5.417	-1.10567	0.464687
1950	WBGene00019682	K12H4.7	K12H4.7	DOWN	13.6813	14.0946	10.7297	11.1336	-2.95633	0.128841
1951	WBGene00019723	M02B7.1	fbxc-47	DOWN	12.0602	12.1808	11.0132	11.1577	-1.03497	0.488026
1952	WBGene00019727	M02D8.1	M02D8.1	DOWN	10.2109	10.5721	9.05612	8.96962	-1.3786	0.384593
1953	WBGene00019731	M02D8.5	M02D8.5	DOWN	8.31813	8.55931	7.27206	7.33994	-1.13272	0.456054
1954	WBGene00019803	PDB1.1	PDB1.1	DOWN	11.8618	11.9228	10.645	10.7797	-1.17991	0.441379
1955	WBGene00019846	R03G5.5	gpx-7	DOWN	9.67712	9.71458	6.86713	7.33994	-2.59232	0.165819
1956	WBGene00019886	R05D8.9	R05D8.9	DOWN	7.20545	7.39252	5.49856	5.79069	-1.65436	0.317679
1957	WBGene00019894	R05F9.11	R05F9.11	DOWN	10.8268	10.8142	9.93546	10.0063	-0.849621	0.55493
1958	WBGene00019905	R05G9.3	R05G9.3	DOWN	11.8183	11.8346	10.5463	10.7636	-1.17148	0.443964
1959	WBGene00019973	R09A1.3	R09A1.3	DOWN	8.6254	8.66278	7.60959	7.60492	-1.03684	0.487395
1960	WBGene00019986	R09F10.1	R09F10.1	DOWN	12.1512	12.0859	10.8738	11.0864	-1.13838	0.454269
1961	WBGene00020022	R12C12.1	R12C12.1	DOWN	6.49468	6.45221	5.6062	5.54567	-0.897514	0.536811
1962	WBGene00020027	R12C12.7	R12C12.7	DOWN	14.9039	15.0788	13.8697	13.9135	-1.09976	0.466593
1963	WBGene00020029	R12C12.9	R12C12.9	DOWN	10.1261	10.2374	8.34816	8.36448	-1.8254	0.282162
1964	WBGene00020082	R57.1	gcp-2.1	DOWN	9.01195	9.08606	7.16003	7.19332	-1.87233	0.273132
1965	WBGene00020103	R148.4	R148.4	DOWN	9.11302	9.01195	8.21009	8.14728	-0.883801	0.541938
1966	WBGene00020110	R151.7	R151.7	DOWN	8.98857	9.03159	8.36499	8.38184	-0.636661	0.6432
1967	WBGene00020129	R193.3	R193.3	DOWN	9.40997	9.12076	7.19619	7.49716	-1.9187	0.264494
1968	WBGene00020139	T01B11.2	T01B11.2	DOWN	8.25849	8.40446	6.67058	6.65979	-1.66628	0.315064
1969	WBGene00020182	T03D3.1	ugt-53	DOWN	8.57301	8.814	6.85546	6.81965	-1.85595	0.27625
1970	WBGene00020191	T03F1.10	clec-53	DOWN	8.44828	8.42115	6.50839	6.67565	-1.8427	0.2788
1971	WBGene00020222	T05A7.5	fut-6	DOWN	8.89256	8.8781	8.17606	8.10988	-0.742358	0.597762
1972	WBGene00020329	T07H3.6	bath-26	DOWN	7.29276	7.4552	5.46626	5.38281	-1.94944	0.258916
1973	WBGene00020394	T10B5.8	T10B5.8	DOWN	9.2181	10.3986	6.97857	7.44809	-2.595	0.165512
1974	WBGene00020433	T11F8.1	T11F8.1	DOWN	12.7382	12.7755	11.6627	11.8011	-1.02495	0.491427
1975	WBGene00020441	T12A2.7	T12A2.7	DOWN	12.9851	12.9329	11.9938	12.091	-0.916562	0.52977
1976	WBGene00020443	T12A2.15	esyt-2	DOWN	11.0852	11.0631	10.0158	10.0769	-1.02786	0.490439
1977	WBGene00020448	T12B5.1	fbxa-51	DOWN	7.88408	7.88951	7.17816	7.20429	-0.69557	0.617465
1978	WBGene00020466	T12F5.1	sld-2	DOWN	13.6911	13.7225	13.0333	13.0746	-0.652818	0.636037
1979	WBGene00020467	T12F5.2	T12F5.2	DOWN	10.7547	10.7725	9.86841	9.74312	-0.95782	0.514834
1980	WBGene00020500	T14B4.3	T14B4.3	DOWN	13.5652	13.6145	12.7815	12.8001	-0.79903	0.574735
1981	WBGene00020516	T15B7.1	T15B7.1	DOWN	11.9105	12.2123	9.47138	10.0485	-2.30147	0.202857
1982	WBGene00020569	T19D7.1	lgc-32	DOWN	9.50521	9.89698	8.21234	8.32121	-1.43432	0.370022
1983	WBGene00020585	T19E7.1	clec-178	DOWN	7.79798	7.90601	6.68094	6.84469	-1.08918	0.470029
1984	WBGene00020625	T20F5.3	mrrf-1	DOWN	12.8057	12.8751	12.0315	12.0979	-0.775705	0.584103
1985	WBGene00020636	T20H4.5	T20H4.5	DOWN	11.3959	11.3648	10.6269	10.6855	-0.724124	0.605365
1986	WBGene00020662	T21H3.1	T21H3.1	DOWN	16.4152	16.1881	14.6419	14.0602	-1.95055	0.258717
1987	WBGene00020674	T22B7.7	T22B7.7	DOWN	15.033	14.9939	11.4094	12.3829	-3.11731	0.115238
1988	WBGene00020688	T22D1.11	T22D1.11	DOWN	7.60036	7.61042	6.30859	6.57743	-1.16238	0.446776
1989	WBGene00020717	T23B12.2	mrpl-4	DOWN	10.1069	10.252	9.23068	9.19687	-0.965666	0.512042
1990	WBGene00020730	T23E1.3	T23E1.3	DOWN	8.2347	8.38045	7.19619	7.29845	-1.06026	0.479547
1991	WBGene00020741	T23F4.3	T23F4.3	DOWN	8.09475	8.16808	5.62778	5.6062	-2.51442	0.175018
1992	WBGene00020783	T24H7.4	blos-4	DOWN	13.2208	13.2724	12.4536	12.4923	-0.77365	0.584936
1993	WBGene00020784	T24H7.5	tat-4	DOWN	15.2878	15.3012	14.6882	14.6974	-0.601699	0.658977
1994	WBGene00020796	T25D3.2	mrpl-28	DOWN	10.6916	10.8219	9.66968	9.7031	-1.07033	0.47621
1995	WBGene00020808	T25F10.6	T25F10.6	DOWN	9.72139	9.79652	8.13069	7.5379	-1.92466	0.263403
1996	WBGene00020819	T26A5.2	T26A5.2	DOWN	11.1333	11.1797	10.3599	10.3898	-0.781659	0.581697
1997	WBGene00020914	W01B11.2	sulp-6	DOWN	7.14182	7.08454	6.41045	6.40631	-0.704801	0.613527
[truncated: 169 more rows]
